# Supplementary material for: The Genomes of Oryza sativa: A History of Duplications
Source: PLoS Biol. 2005 Feb 1;3(2):e38. doi: 10.1371/journal.pbio.0030038 (PMC546038; doi:10.1371/journal.pbio.0030038)
Supplement: Table S1 — Read length is the number of Q20 bases with an error rate of 10−2 or better. Effective coverage is based on the depth of reads in contigs over 5 kb in size, ignoring regions with 20-mer repeats. Clone insert sizes are specified in terms of tenth and 90th percentiles. (16 KB XLS). [file pbio.0030038.st001.xls]

## Sheet: Sheet1
	Beijing indica	Syngenta japonica
Reads for initial contigs
all shotgun reads	6448869	7852425
reads of length>200	4986685	5958836
mean Q20 length	551.111	425.374
median Q20 length	578	455
effective coverage	6.28	6.02
Plasmids for scaffolds
plasmid end pairs	2780793	3669371
insert-size range	1.6k--2.8k	1.4k--2.0k
plasmid end pairs	165833
insert-size range	2.8k--3.6k
plasmid end pairs	71902
insert-size range	3.7k--8.0k
BACs in super-scaffolds
Indica end pairs	36778	36778
insert-size range	116k--197k	116k--197k
Japonica end pairs	54789	54789
insert-size range	127k--177k	127k--177k
