# Supplementary material for: The Genomes of Oryza sativa: A History of Duplications
Source: PLoS Biol. 2005 Feb 1;3(2):e38. doi: 10.1371/journal.pbio.0030038 (PMC546038; doi:10.1371/journal.pbio.0030038)
Supplement: Table S2 — As a result of our efforts to identify indica–japonica polymorphisms, the sequence is divided into four nonoverlapping categories: unassembled, assembled-but-unmapped, mapped-but-unaligned, and aligned (with all the SNPs). (28 KB XLS). [file pbio.0030038.st002.xls]

## Sheet: unaligned
9311 unaligned sequence:				assembled size:
				98849075
		Total (bp)	% of data set	% of repeats
Simple repeats	SSRs	1568689	1.58695	6.06114
	Low_complexity	1003965	1.01565	3.87915
	Subtotal	2572654	2.60261	9.94029
Class I	LINEs	546856	0.553223	2.11296
	SINEs	66511	0.0672854	0.256987
	gypsy-like	13545477	13.7032	52.3374
	copia-like	3194753	3.23195	12.344
	Subtotal	17353597	17.5556	67.0513
Class II	Ac/Ds TEs	100506	0.101676	0.388338
	En/Spm TEs	266403	0.269505	1.02934
	MULEs	2003657	2.02699	7.74178
	Subtotal	2370566	2.39817	9.15946
Class III	Stowaway-like	1440615	1.45739	5.56629
	Tourist-like	1940943	1.96354	7.49947
	Unknown MITEs	202702	0.205062	0.783205
	Subtotal	3584260	3.62599	13.849
	Grand Total	25881077	26.1824	100

## Sheet: unmapped
9311 unmapped sequence:				assembled size:
(count only sequence >=2K)				51280805
		Total (bp)	% of data set	% of repeats
Simple repeats	SSRs	582498	1.1359	3.01597
	Low_complexity	328060	0.639733	1.69858
	Subtotal	910558	1.77563	4.71456
Class I	LINEs	99085	0.19322	0.513028
	SINEs	7625	0.0148691	0.0394796
	gypsy-like	15156192	29.5553	78.4736
	copia-like	2214475	4.31833	11.4658
	Subtotal	17477377	34.0817	90.4919
Class II	Ac/Ds	14574	0.02842	0.0754592
	En/Spm	85014	0.165781	0.440173
	MULEs	383969	0.748758	1.98806
	Subtotal	483557	0.942959	2.50369
Class III	Stowaway-like	153613	0.299553	0.795355
	tourist-like	221762	0.432446	1.14821
	Unknown MITEs	66890	0.130439	0.346333
	Subtotal	442265	0.862438	2.2899
	Grand Total	19313757	37.6627	100

## Sheet: unassembled
9311 fully masked reads:				equivalent size:
(20-mer depth >=14 read)				3.95131e+07
		Total (bp)	% of data set	% of repeats
Simple repeats	SSRs	222044	0.56195	1.5303
	Low_complexity	199208	0.504158	1.37292
	Subtotal	421252	1.06611	2.90322
Class I	LINEs	40811.6	0.103286	0.28127
	SINEs	1014.81	0.00256829	0.00699396
	gypsy-like	1.23147e+07	31.1661	84.8714
	copia-like	1.25839e+06	3.18473	8.67267
	Subtotal	1.36149e+07	34.4566	93.8323
Class II	Ac/Ds	4175.64	0.0105677	0.0287781
	En/Spm	49586.3	0.125493	0.341744
	MULEs	179447	0.454146	1.23673
	Subtotal	233209	0.590207	1.60725
Class III	Stowaway-like	50595.2	0.128047	0.348697
	Tourist-like	140493	0.35556	0.968261
	Unknown MITEs	49368.2	0.124941	0.34024
	Subtotal	240456	0.608548	1.6572
	Grand Total	1.45098e+07	36.7215	100

## Sheet: usable SNP
9311 aligned sequence:				assembled size:
				260552083
		Total (bp)	% of data set	% of repeats
Simple repeats	SSRs	2196277	0.842932	6.35497
	Low_complexity	2365002	0.907689	6.84318
	Subtotal	4561279	1.75062	13.1982
Class I	LINEs	1496336	0.574294	4.32968
	SINEs	237302	0.0910766	0.686638
	gypsy-like	7849069	3.01248	22.7114
	copia-like	2043721	0.784381	5.91355
	Subtotal	11626428	4.46223	33.6413
Class II	Ac/Ds TEs	287420	0.110312	0.831656
	En/Spm TEs	376284	0.144418	1.08879
	MULEs	4951653	1.90045	14.3277
	Subtotal	5615357	2.15518	16.2482
Class III	Stowaway-like	5299695	2.03403	15.3348
	Tourist-like	7003277	2.68786	20.2641
	Unknown MITEs	453938	0.174222	1.31348
	Subtotal	12756910	4.89611	36.9124
	Grand Total	34559974	13.2641	100
