# Supplementary material for: The Genomes of Oryza sativa: A History of Duplications
Source: PLoS Biol. 2005 Feb 1;3(2):e38. doi: 10.1371/journal.pbio.0030038 (PMC546038; doi:10.1371/journal.pbio.0030038)
Supplement: Table S3 — For each region of the Venn diagram, we use BLAT to align the predicted gene to the other assembly (or assemblies) where the gene is supposedly missing. The objective is to determine whether it is the sequence that is missing, or whether the discrepancy is due to the errors in the ab initio predictions. What we find is a bit of both. However, fragmented sequence assemblies are not a problem. If the gene is found at all, it is usually found in one piece. What is striking is that predicted genes that are unique to the two WGS assemblies do tend to be genuinely missing from IRGSP japonica sequence. This supports the idea that the WGS method can sometimes identify genes that are not well represented in the BAC clone libraries. (17 KB XLS). [file pbio.0030038.st003.xls]

## Sheet: Sheet1
FOUND IN	BUT NOT IN	Total	% with EST		# with EST	% found in genome	% found in one piece		# w/o EST	% found in genome	% found in one piece
Beijing indica	Syngenta japonica IRGSP japonica	8595	4.92		423	64.0662	43.4988		8172	44.3221	33.9085
Beijing indica Syngenta japonica	IRGSP japonica	1967	27		531	10.5461	6.77966		1436	28.4123	21.8663
Beijing indica IRGSP japonica	Syngenta japonica	1586	20.05		318	46.5409	36.478		1268	60.1735	47.0032
Beijing indica and ALL others		36940	38.9		14369	N/A	N/A		22571	N/A	N/A
Syngenta japonica	Beijing indica IRGSP japonica	3268	3.03		99	74.7475	58.5859		3169	32.029	26.9486
Syngenta japonica Beijing indica	IRGSP japonica	1727	29.3		506	10.2767	7.31225		1221	27.6822	22.113
Syngenta japonica IRGSP japonica	Beijing indica	5777	8.53		493	44.8276	34.4828		5284	57.2483	44.436
Syngenta japonica and ALL others		35052	39.5		13844	N/A	N/A		21208	N/A	N/A
IRGSP japonica	Beijing indica Syngenta japonica	1079	7.69		83	60.241	50.6024		996	77.3092	62.1486
IRGSP japonica Beijing indica	Syngenta japonica	1331	20.89		278	42.446	37.4101		1053	58.0247	48.8129
IRGSP japonica Syngenta japonica	Beijing indica	5817	8.77		510	41.9608	32.7451		5307	57.5655	44.9783
IRGSP japonica and ALL others		35408	40.31		14273	N/A	N/A		21135	N/A	N/A
