# Supplementary material for: The Genomes of Oryza sativa: A History of Duplications
Source: PLoS Biol. 2005 Feb 1;3(2):e38. doi: 10.1371/journal.pbio.0030038 (PMC546038; doi:10.1371/journal.pbio.0030038)
Supplement: Table S4 — One table compares predicted genes from Arabidopsis and Beijing indica. The second table compares predicted genes from Beijing indica with nr-KOME cDNAs. (169 KB XLS). [file pbio.0030038.st004.xls]

## Sheet: O.sativa_9311_VS_A.thaliana.dom
	Monocot-eudicot	O.sativa(Beijing)		A.thaliana
	# of Genes in data set	49088		25426
	# with Interpro_ID	14407		10422
Interpro_ID	Domain_Name	Genes	Rank	Genes	Rank
IPR002219	Phorbol esters/diacylglycerol binding domain	836	1	494	3
IPR001810	F-box domain	809	2	641	1
IPR001170	Natriuretic peptides receptor, N-terminus	641	3	457	4
IPR002182	NB-ARC domain	453	4	133	14
IPR001841	RING finger	435	5	495	2
IPR001899	Gram-positive cocci surface protein 'anchoring' hexapeptide	424	6	283	7
IPR000477	RNA-directed DNA polymerase (Reverse transcriptase)	384	7	77	36
IPR001005	Myb DNA binding domain	373	8	312	5
IPR000345	Cytochrome c family heme-binding site	372	9	257	8
IPR000504	RNA-binding region RNP-1 (RNA recognition motif)	341	10	302	6
IPR003885	Leucine-rich repeat cysteine-containing subfamily	307	11	177	11
IPR001084	Microtubule associated Tau protein	278	12	94	27
IPR002048	EF-hand	255	13	238	9
IPR000822	Zinc finger, C2H2 type	253	14	201	10
IPR001230	Prenyl group binding site (CAAX box)	251	15	148	12
IPR003439	ABC transporter	241	16	123	15
IPR003163	Yeast DNA-binding domain	192	17	107	21
IPR003015	Myc-type, helix-loop-helix dimerization domain	185	18	106	22
IPR000210	BTB/POZ domain	178	19	64	46
IPR001471	AP2 domain/ethylene responsive element binding protein	170	20	146	13
IPR000561	EGF-like domain	163	21	64	47
IPR000169	Eukaryotic thiol (cysteine) proteases active site	155	22	68	39
IPR003612	Plant lipid transfer/seed storage/trypsin-alpha amylase inhibitor domain	138	23	95	26
IPR001623	DnaJ N-terminal domain	126	24	107	20
IPR000637	HMG-I and HMG-Y DNA-binding domain (A+T-hook)	125	25	85	33
IPR001589	Actinin-type actin-binding domain	124	26	104	23
IPR001092	Basic helix-loop-helix dimerization domain (bHLH)	118	27	99	25
IPR001934	Heavy-metal-associated domain	116	28	86	32
IPR003006	Immunoglobulin and major histocompatibility complex domain	112	29	52	57
IPR000424	Single-strand binding protein family	110	30	65	45
IPR001007	von Willebrand factor, type C repeat	108	31	62	49
IPR003657	WRKY DNA binding domain	106	32	70	38
IPR003609	Divergent subfamily of APPLE domain	105	33	35	78
IPR002078	Sigma-54 factor interaction domain	104	34	109	18
IPR001064	Crystallin	100	35	112	17
IPR001650	Helicase C-terminal domain	97	36	94	28
IPR000008	C2 domain	95	37	99	24
IPR000626	Ubiquitin domain	95	38	93	29
IPR001356	Homeobox domain	94	39	91	30
IPR004330	FAR1 protein	94	40	17	142
IPR000097	AP endonucleases family 1	92	41	35	76
IPR000953	Chromo domain	92	42	17	136
IPR001932	Protein phosphatase 2C domain	91	43	80	35
IPR004045	Glutathione S-transferase N terminus	89	44	55	56
IPR000130	Neutral zinc metallopeptidases, zinc-binding region	88	45	65	44
IPR000531	TonB-dependent receptor protein	83	46	59	51
IPR002083	Meprin and TRAF Homology domain (MATH)	81	47	59	52
IPR004332	Plant MuDR transposase	81	48	74	37
IPR002100	MADS-box domain	79	49	108	19
IPR004046	Glutathione S-transferase C terminus	79	50	50	58
IPR002168	Lipolytic enzymes	78	51	31	86
IPR001881	Calcium-binding EGF-like domain	73	52	24	104
IPR000571	Zinc finger C-x8-C-x5-C-x3-H type	69	53	67	40
IPR001789	Response regulator receiver domain	69	54	39	68
IPR002528	Uncharacterized domain UPF0013	69	55	62	50
IPR001965	PHD-finger	68	56	90	31
IPR003594	Histidine kinase-, DNA gyrase B-, phytochrome-like ATPase	68	57	31	87
IPR003613	Modified RING finger domain	68	58	58	53
IPR001220	Legume lectin beta domain	66	59	38	71
IPR000063	Thioredoxin	63	60	65	42
IPR003245	Plant cyanin copper (blue) type domain	61	61	35	77
IPR001752	Kinesin motor domain	60	62	63	48
IPR001929	Germin	60	63	37	72
IPR003137	Protease associated (PA) domain	60	64	66	41
IPR001917	Aminotransferases class-II	58	65	26	100
IPR004253	DUF231 domain	58	66	46	60
IPR000070	Pectinesterase	53	67	65	43
IPR000689	UbiH/COQ6 monooxygenase family	53	68	57	54
IPR000629	ATP-dependent helicase, DEAD-box	51	69	38	70
IPR000644	CBS domain	51	70	29	91
IPR000743	Glycoside hydrolase family 28	51	71	82	34
IPR000623	Shikimate kinase	50	72	42	64
IPR001343	Hemolysin-type calcium-binding region	50	73	26	98
IPR001575	FAD linked oxidase, N-terminal	50	74	44	62
IPR000608	Ubiquitin-conjugating enzymes	47	75	47	59
IPR000194	ATP synthase alpha and beta subunit, central region	46	76	43	63
IPR000595	Cyclic nucleotide-binding domain	44	77	30	89
IPR003656	BED finger	43	78	13	177
IPR004087	KH domain	41	79	35	79
IPR000449	Ubiquitin-associated domain	40	80	34	80
IPR000985	Legume lectin alpha domain	37	81	25	102
IPR001895	Guanine-nucleotide dissociation stimulators CDC25 family	37	82	33	83
IPR000005	AraC type helix-turn-helix	36	83	14	160
IPR001214	SET-domain of transcriptional regulators (TRX, EZ, ASH1 etc)	36	84	34	81
IPR001825	ADP-glucose pyrophosphorylase	36	85	26	99
IPR002162	D-isomer specific 2-hydroxyacid dehydrogenase	36	86	30	90
IPR003660	HAMP domain	36	87	4	382
IPR000849	GlpT family of transporters	35	88	29	92
IPR001849	Pleckstrin homology (PH) domain	35	89	40	67
IPR000432	DNA mismatch repair protein MutS family, C-terminal domain	34	90	13	169
IPR001229	Jacalin-related lectin domain	34	91	40	66
IPR002035	von Willebrand factor type A domain	34	92	22	111
IPR000727	Target SNARE coiled-coil domain	33	93	33	82
IPR000897	GTP-binding signal recognition particle (SRP54) G-domain	33	94	21	114
IPR001753	Enoyl-CoA hydratase/isomerase	33	95	18	131
IPR000086	NUDIX hydrolase	32	96	30	88
IPR001251	Cellular retinaldehyde-binding protein (CRAL)/Triple function domain (TRIO)	32	97	36	75
IPR000774	Domain amino terminal to FKBP-type peptidyl-prolyl isomerase	31	98	20	118
IPR001320	Ionotropic glutamate receptor	31	99	19	123
IPR001737	Ribosomal RNA adenine dimethylase	31	100	21	115
IPR002912	ACT domain	31	101	23	108
IPR004314	Arabidopsis DUF239 protein	31	102	42	65
IPR000330	SNF2 related domain	30	103	38	69
IPR001487	Bromodomain	30	104	32	84
IPR001763	Rhodanese/cdc25 fold	30	105	17	139
IPR000315	B-box zinc finger domain	29	106	36	74
IPR000679	GATA-type zinc finger domain	29	107	27	95
IPR001073	Complement C1q protein	29	108	11	204
IPR001510	Poly(ADP-ribose) polymerase zinc finger domain	29	109	15	153
IPR002130	Cyclophilin-type peptidyl-prolyl cis-trans isomerase	29	110	29	93
IPR000232	Heat shock factor (HSF)-type DNA-binding domain	28	111	25	101
IPR000583	Glutamine amidotransferase class-II	28	112	17	135
IPR000886	Endoplasmic reticulum targeting sequence	28	113	44	61
IPR002464	ATP-dependent helicase, DEAH-box	28	114	29	94
IPR002482	LysM motif	28	115	13	175
IPR004161	Elongation factor Tu domain 2	28	116	27	97
IPR001678	NOL1/NOP2/sun family	27	117	17	138
IPR004359	Histidine kinase C-terminal	27	118	12	199
IPR001357	BRCT domain	26	119	15	152
IPR003029	S1 RNA binding domain	26	120	19	124
IPR003851	Dof zinc finger	26	121	37	73
IPR000014	PAS domain	25	122	20	117
IPR000672	Tetrahydrofolate dehydrogenase/cyclohydrolase	25	123	12	183
IPR000965	Gamma-glutamyl phosphate reductase	24	124	11	203
IPR001159	Double-stranded RNA binding (DsRBD) domain	24	125	17	137
IPR001594	DHHC-type Zn-finger	24	126	22	110
IPR000292	Formate and nitrite transporters	23	127	5	314
IPR001002	Chitin-binding domain	23	128	15	151
IPR001313	Pumilio-family RNA binding domains (aka PUM-HD, Pumilio homology domain)	23	129	25	103
IPR001876	Zn-finger in ranbp and others	23	130	18	132
IPR002939	DnaJ C terminal domain	23	131	20	121
IPR003104	Formin Homology 2 Domain	23	132	24	107
IPR001433	Oxidoreductase FAD and NAD(P)-binding domain	22	133	12	188
IPR001478	PDZ domain (also known as DHR or GLGF)	22	134	18	130
IPR002913	START domain	22	135	24	105
IPR000160	Domain of unknown function, DUF9	21	136	0	Inf
IPR001858	Phosphatidylethanolamine-binding protein family	21	137	7	269
IPR002135	3-hydroxyacyl-CoA dehydrogenase	21	138	20	120
IPR003616	Post-SET domain	21	139	19	125
IPR003661	Histidine kinase A, N-terminal	21	140	8	255
IPR004367	Cyclin C-terminus	21	141	32	85
IPR000717	Domain in components of the proteasome, COP9-complex and eIF3 (PCI)	20	142	16	143
IPR001202	WW / rsp5 / WWP domain	20	143	10	216
IPR003016	2-oxo acid dehydrogenases acyltransferase component lipoyl binding site	20	144	16	145
IPR003100	PAZ domain	20	145	12	197
IPR003958	Transcription factor (CBF/NF-Y) and archaeal histone	20	146	23	109
IPR000195	RabGAP/TBC domain	19	147	21	112
IPR000304	Delta 1-pyrroline-5-carboxylate reductase	19	148	18	127
IPR000804	Clathrin adaptor complex, small chain	19	149	14	163
IPR001450	4Fe-4S ferredoxin, iron-sulfur binding domain	19	150	8	245
IPR002942	S4 domain	19	151	12	196
IPR004333	SBP plant protein domain	19	152	15	159
IPR000306	FYVE Zn-finger, rabphilin/VPS27/FAB1 type	18	153	13	168
IPR000760	Inositol monophosphatase	18	154	12	184
IPR001024	Lipoxygenase, region 2	18	155	8	243
IPR001609	Myosin head (motor domain)	18	156	27	96
IPR003165	Piwi domain	18	157	10	224
IPR003617	Domain in N-terminus of transcription elongation factor S-II (and elsewhere)	18	158	15	157
IPR003961	Fibronectin type III domain	18	159	11	211
IPR004014	Cation transporter ATPase	18	160	19	126
IPR004182	GRAM domain	18	161	13	179
IPR000058	AN1-like Zinc finger	17	162	11	200
IPR000062	Thymidylate kinase	17	163	10	213
IPR000302	Ribosomal protein L24/bacterial NUSG	17	164	21	113
IPR000524	Bacterial regulatory proteins, GntR family	17	165	3	399
IPR001045	Spermidine synthase	17	166	18	128
IPR001199	Cytochrome b5	17	167	18	129
IPR001764	Glycoside hydrolase family 3, N terminal	17	168	13	173
IPR002199	Uncharacterized protein family UPF0005	17	169	18	133
IPR000253	Forkhead-associated (FHA) domain	16	170	13	167
IPR000283	Respiratory-chain NADH dehydrogenase 75 Kd subunit	16	171	7	261
IPR000385	MoaA / nifB / pqqE family	16	172	8	241
IPR000594	UBA/THIF-type NAD/FAD binding fold	16	173	10	214
IPR001025	BAH (bromo-adjacent homology) domain	16	174	19	122
IPR001026	Epsin N-terminal homology (ENTH) domain	16	175	20	119
IPR001587	Uncharacterized protein UPF0036	16	176	14	165
IPR001633	Domain of unknown function 2	16	177	2	472
IPR001652	NAD-dependent glycerol-3-phosphate dehydrogenase	16	178	15	154
IPR001882	Biotin-requiring enzymes attachment site.	16	179	12	192
IPR003753	Exonuclease VII, large subunit	16	180	16	146
IPR000092	Polyprenyl synthetase	15	181	17	134
IPR000166	Histone-fold/TFIID-TAF/NF-Y domain	15	182	15	149
IPR000558	Histone H2B	15	183	11	202
IPR001012	UBX domain	15	184	13	171
IPR001541	SUR2-type hydroxylase/desaturase catalytic domain	15	185	14	164
IPR001663	Bacterial ring hydroxylating dioxygenases alpha-subunit	15	186	8	246
IPR002645	STAS domain	15	187	12	193
IPR002934	DNA polymerase beta-like domain	15	188	12	195
IPR003034	SAP domain	15	189	10	223
IPR003280	Two pore domain of K+ channel	15	190	14	166
IPR003347	jmjC domain	15	191	17	141
IPR003606	N-terminal to some SET domains	15	192	11	210
IPR004331	SPX, N-terminal	15	193	21	116
IPR004365	OB-fold nucleic acid binding domain	15	194	16	147
IPR000095	PAK-box /P21-Rho-binding	14	195	12	181
IPR000173	Glyceraldehyde 3-phosphate dehydrogenase	14	196	9	230
IPR000467	D111/G-patch domain	14	197	14	162
IPR000782	Beta-Ig-H3/Fasciclin domain	14	198	13	170
IPR000792	Bacterial regulatory protein, LuxR family	14	199	1	540
IPR000838	Sigma factor, ECF subfamily	14	200	4	360
IPR000842	Phosphoribosyl pyrophosphate synthetase	14	201	12	185
IPR001206	DAG-kinase catalytic domain (presumed)	14	202	10	217
IPR001739	Methyl-CpG binding domain	14	203	10	220
IPR002028	Tryptophan synthase alpha chain	14	204	2	481
IPR004156	Organic Anion Transporter Polypeptide (OATP) N-terminus	14	205	10	228
IPR000262	FMN-dependent alpha-hydroxy acid dehydrogenases	13	206	8	239
IPR000352	Class I peptide chain release factor	13	207	9	231
IPR000403	Phosphatidylinositol 3- and 4-kinase	13	208	12	182
IPR000843	Bacterial regulatory protein, LacI family	13	209	2	463
IPR001745	GHMP kinases putative ATP-binding domain	13	210	12	190
IPR001951	Histone H4	13	211	3	416
IPR002625	Smr domain	13	212	11	207
IPR002710	Dilute (DIL) domain	13	213	12	194
IPR002925	Dienelactone hydrolase	13	214	4	377
IPR002999	Tudor domain	13	215	24	106
IPR003105	G9a domain	13	216	12	198
IPR004099	Pyridine nucleotide-disulphide oxidoreductase dimerisation domain	13	217	5	338
IPR000164	Histone H3	12	218	11	201
IPR000287	Arginase family	12	219	4	349
IPR000313	PWWP domain	12	220	14	161
IPR000922	D-galactoside/L-rhamnose binding SUEL lectin domain	12	221	10	215
IPR001093	IMP dehydrogenase / GMP reductase	12	222	4	361
IPR001305	DnaJ central domain (CXXCXGXG)	12	223	8	244
IPR001977	Uncharacterized protein family UPF0038	12	224	7	271
IPR002014	VHS domain	12	225	10	221
IPR003035	RWP-RK domain	12	226	15	156
IPR003583	Helix-hairpin-helix DNA-binding motif class 1	12	227	7	281
IPR004009	Myosin N-terminal SH3-like domain	12	228	10	227
IPR000198	RhoGAP domain	11	229	7	260
IPR000326	PA-phosphatase related phosphoesterase	11	230	8	240
IPR000433	ZZ Zinc finger	11	231	8	242
IPR000535	Major sperm protein (MSP) domain	11	232	9	232
IPR001715	Calponin homology (CH) domain	11	233	12	189
IPR001727	Uncharacterized protein family UPF0016	11	234	13	172
IPR001781	LIM domain	11	235	12	191
IPR002108	Cofilin/tropomyosin-type actin-binding protein	11	236	13	174
IPR002867	Cysteine-rich domain (C6HC)	11	237	17	140
IPR003018	GAF domain	11	238	10	222
IPR000551	Bacterial regulatory proteins, MerR family	10	239	0	Inf
IPR001920	Aspartate and glutamate racemases	10	240	7	270
IPR001943	UvrB/uvrC motif	10	241	9	234
IPR002125	Cytidine and deoxycytidylate deaminase zinc-binding region	10	242	16	144
IPR003121	BAF60b domain of the SWIB complex	10	243	13	176
IPR003349	jmjN domain	10	244	8	253
IPR003607	Metal dependent phosphohydrolase HD domain	10	245	10	225
IPR003864	Domain of unknown function DUF221	10	246	13	178
IPR003890	Middle domain of eIF4G	10	247	9	236
IPR004152	GAT domain	10	248	8	257
IPR000244	Ribosomal protein L9	9	249	5	312
IPR000612	Uncharacterized protein family UPF0057	9	250	6	291
IPR000741	Fructose-bisphosphate aldolase, class-I	9	251	7	264
IPR001030	Aconitate hydratase, N-terminal	9	252	5	321
IPR001078	2-Oxo acid dehydrogenase acyltransferase catalytic domain	9	253	5	324
IPR001828	Receptor family ligand binding region	9	254	8	249
IPR001880	Uncharacterized protein family UPF0003	9	255	11	205
IPR002202	Hydroxymethylglutaryl-coenzyme A reductase	9	256	3	418
IPR002346	FAD binding domain in molybdopterin dehydrogenase	9	257	6	300
IPR003103	Domain present in Hsp70 regulator	9	258	5	333
IPR003106	Homeobox associated leucine zipper	9	259	8	250
IPR003111	ATP-dependent protease La (LON) domain	9	260	7	279
IPR003130	Dynamin GTPase effector domain	9	261	11	208
IPR003216	Linker histone, N-terminus	9	262	11	209
IPR003231	Acyl carrier protein (ACP)	9	263	8	252
IPR003305	Cellulose binding domain	9	264	9	235
IPR003892	CUE domain	9	265	2	509
IPR004146	DC1 domain	9	266	8	256
IPR004154	Anticodon binding domain	9	267	8	258
IPR004157	Organic Anion Transporter Polypeptide (OATP) C-terminus	9	268	8	259
IPR004274	NLI interacting factor	9	269	11	212
IPR000266	Ribosomal protein S17	8	270	6	287
IPR000291	D-alanine--D-alanine ligase	8	271	5	313
IPR000308	14-3-3 proteins	8	272	15	150
IPR000485	Bacterial regulatory proteins, AsnC family	8	273	1	533
IPR000569	HECT domain (Ubiquitin-protein ligase)	8	274	7	262
IPR000756	Diacylglycerol kinase accessory domain (presumed)	8	275	7	265
IPR000808	Mrp family	8	276	6	293
IPR000904	SEC7-like domain	8	277	9	233
IPR001145	Bacterial outer membrane protein	8	278	0	Inf
IPR001304	C-type lectin domain	8	279	12	187
IPR001331	Guanine-nucleotide dissociation stimulators CDC24 family	8	280	2	469
IPR001608	Uncharacterized pyridoxal-5'-phosphate dependent enzyme family UPF0001	8	281	4	366
IPR001660	SAM domain (Sterile alpha motif)	8	282	10	219
IPR001683	PX (Bem1/NCF1/PI3K) domain	8	283	8	247
IPR001823	Aldose 1-epimerase	8	284	4	368
IPR001852	Uncharacterized protein family UPF0019	8	285	4	369
IPR001884	Eukaryotic initiation factor 5A hypusine (eIF-5A)	8	286	4	370
IPR001950	Translation initiation factor SUI1	8	287	11	206
IPR002013	Synaptojanin N-terminal domain	8	288	7	273
IPR002075	Nuclear transport factor 2 (NTF2)	8	289	15	155
IPR002197	Helix-turn-helix Fis-type	8	290	0	Inf
IPR002478	PUA domain	8	291	5	331
IPR002888	[2Fe-2S] binding domain	8	292	6	302
IPR003453	Domain of unknown function DUF140	8	293	3	431
IPR003584	Helix-hairpin-helix motif class 2 (Pol1-type)	8	294	8	254
IPR003602	DNA topoisomerase I DNA-binding domain	8	295	3	434
IPR003725	Molybdenum-binding protein, N-terminal	8	296	0	Inf
IPR003891	MA3 domain	8	297	10	226
IPR004176	Clp amino terminus	8	298	10	229
IPR004193	Isoamylase N-terminus	8	299	7	286
IPR000061	SWAP / SURP	7	300	15	148
IPR000189	SLT domain	7	301	1	526
IPR000285	Bacterial regulatory proteins, IclR family	7	302	2	450
IPR000297	PpiC-type peptidyl-prolyl cis-trans isomerase	7	303	3	391
IPR000529	Ribosomal protein S6	7	304	6	290
IPR000543	YER057c/YjgF/UK114 family	7	305	2	456
IPR000772	Ricin B lectin domain	7	306	3	403
IPR001691	Glutamine synthetase	7	307	6	297
IPR001731	Delta-aminolevulinic acid dehydratase	7	308	8	248
IPR001822	Site-specific recombinase	7	309	0	Inf
IPR001900	Ribonuclease II domain	7	310	3	415
IPR002020	Citrate synthase	7	311	7	274
IPR002121	HRDC domain	7	312	4	371
IPR002205	DNA gyrase/topoisomerase IV, subunit A	7	313	4	373
IPR002376	Formyl transferase N-terminus	7	314	3	419
IPR002687	Putative snoRNA binding domain	7	315	7	276
IPR003169	GYF domain	7	316	8	251
IPR003843	UPF0010_DUF	7	317	7	284
IPR004217	Tim10/DDP zinc finger	7	318	4	385
IPR000114	Ribosomal protein L16	6	319	0	Inf
IPR000127	Ubiquitin-activating enzyme repeat domain	6	320	4	344
IPR000206	Ribosomal protein L7/L12 C-terminal domain	6	321	8	238
IPR000218	Ribosomal protein L14b/L23e family	6	322	4	347
IPR000294	Vitamin K-dependent carboxylation/gamma-carboxyglutamic (GLA) domain	6	323	4	350
IPR000365	4-hydroxybenzoyl-CoA thioesterase family active site	6	324	3	395
IPR000409	Beige/BEACH domain	6	325	6	289
IPR000517	Ribosomal protein L30	6	326	4	352
IPR000692	Fibrillarin	6	327	5	316
IPR000716	Thyroglobulin type-1 repeat	6	328	5	318
IPR000793	ATP synthase alpha and beta subunit, C-terminal	6	329	4	359
IPR000961	Protein kinase C-terminal domain	6	330	12	186
IPR001075	Nitrogen-fixing protein NifU	6	331	5	323
IPR001094	Flavodoxin-like domain	6	332	4	362
IPR001104	Steroid 5-alpha reductase, C-terminal domain	6	333	5	325
IPR001212	Somatomedin B domain	6	334	7	266
IPR001293	TRAF-type zinc finger	6	335	2	467
IPR001452	Src homology 3 (SH3) domain	6	336	4	365
IPR001468	Indole-3-glycerol phosphate synthase	6	337	2	470
IPR001606	AT-rich interaction domain (ARID)	6	338	10	218
IPR001772	Kinase associated domain 1	6	339	3	413
IPR001910	Inosine-uridine preferring nucleoside hydrolase	6	340	5	329
IPR002004	Poly-adenylate binding protein, unique domain	6	341	7	272
IPR002715	Nascent polypeptide Associated Complex (NAC) domain	6	342	7	277
IPR002893	MYND zinc finger (ZnF) domain	6	343	7	278
IPR003131	K+ channel tetramerisation domain	6	344	3	426
IPR003582	ShK toxin domain	6	345	4	378
IPR003604	U1-like zinc finger	6	346	4	381
IPR003611	Intron-encoded nuclease repeat 2	6	347	5	336
IPR003736	DUF157	6	348	3	435
IPR003811	DUF205	6	349	6	303
IPR003832	DUF212	6	350	5	337
IPR004022	DDT domain	6	351	6	306
IPR004095	TGS domain	6	352	6	307
IPR004160	Elongation factor Tu C-terminal domain	6	353	5	340
IPR004167	E3 binding domain	6	354	5	341
IPR004179	Sec63 domain	6	355	5	342
IPR000002	Cdc20/Fizzy	5	356	8	237
IPR000004	Saposin type B	5	357	4	343
IPR000118	Granulin	5	358	5	309
IPR000181	Formylmethionine deformylase	5	359	2	446
IPR000214	Formamidopyrimidine-DNA glycolase, zinc binding domain	5	360	2	447
IPR000347	Metallothionein (family 15)	5	361	2	453
IPR000358	Ribonucleotide reductase	5	362	3	394
IPR000374	Phosphatidate cytidylyltransferase	5	363	6	288
IPR000544	Lipoate-protein ligase B	5	364	5	315
IPR000568	ATP synthase A subunit	5	365	3	400
IPR000702	Ribosomal protein L6	5	366	4	355
IPR000704	Casein kinase II, regulatory subunit	5	367	5	317
IPR000705	Galactokinase	5	368	4	356
IPR000711	ATP synthase, delta (OSCP) subunit	5	369	4	357
IPR000911	Ribosomal protein L11	5	370	6	294
IPR001222	TFIIS zinc ribbon domain	5	371	6	296
IPR001347	SIS domain	5	372	1	550
IPR001368	TNFR/CD27/30/40/95 cysteine-rich region	5	373	4	364
IPR001381	Dehydroquinase class I active site	5	374	1	552
IPR001645	Folylpolyglutamate synthetase	5	375	4	367
IPR001651	Gastrin/cholecystokinin family	5	376	1	555
IPR001694	Respiratory-chain NADH dehydrogenase subunit 1	5	377	5	326
IPR001748	G10 protein	5	378	1	562
IPR001754	Orotidine 5'-phosphate decarboxylase	5	379	1	564
IPR001765	Prokaryotic-type carbonic anhydrase	5	380	6	298
IPR001783	Riboflavin synthase alpha chain family lumazine binding domain	5	381	6	299
IPR001890	Uncharacterized protein family UPF0044	5	382	5	328
IPR001983	Translationally controlled tumor protein	5	383	2	479
IPR001999	Osteonectin domain	5	384	2	480
IPR002044	Glycosyl hydrolase, starch-binding domain	5	385	2	482
IPR002059	Cold-shock DNA-binding domain	5	386	3	417
IPR002369	Integrins, beta chain	5	387	5	330
IPR002547	Putative tRNA binding domain	5	388	3	420
IPR002735	Domain found in IF2B/IF5	5	389	5	332
IPR002781	Domain of unknown function DUF81	5	390	4	375
IPR002936	Toprim domain	5	391	3	424
IPR002994	SURF1 family	5	392	2	493
IPR003348	Anion-transporting ATPase	5	393	3	429
IPR003395	SMC domain N terminal domain	5	394	5	335
IPR003405	SMC family, C-terminal domain	5	395	3	430
IPR003603	Motif occurring C-terminal to leucine-rich repeats	5	396	4	380
IPR003618	Domain in central region of transcription elongation factor S-II (and elsewhere)	5	397	7	282
IPR003651	Iron-sulfur cluster loop (FCL)	5	398	7	283
IPR003781	DUF184	5	399	4	383
IPR003877	SPla and the RYanodine Receptor (SPRY)	5	400	7	285
IPR003953	Fumarate reductase/succinate dehydrogenase flavoprotein, N-terminal	5	401	3	437
IPR004343	Plus-3	5	402	4	386
IPR004361	Glyoxalase I	5	403	3	442
IPR000020	Anaphylatoxin/Fibulin	4	404	1	522
IPR000049	Electron transfer flavoprotein beta-subunit	4	405	2	443
IPR000131	ATP synthase gamma subunit	4	406	5	310
IPR000139	Antitermination protein NusB	4	407	2	445
IPR000170	High potential iron-sulfur protein	4	408	0	Inf
IPR000196	Ribosomal protein L19e	4	409	4	345
IPR000197	TAZ finger	4	410	4	346
IPR000235	Ribosomal protein S7	4	411	4	348
IPR000257	Uroporphyrinogen decarboxylase (URO-D)	4	412	3	389
IPR000267	Asparaginase/glutaminase family	4	413	3	390
IPR000398	Thymidylate synthase	4	414	4	351
IPR000573	Aconitate hydratase, C-terminal	4	415	7	263
IPR000592	Ribosomal protein S27E	4	416	4	353
IPR000652	Triosephosphate isomerase	4	417	2	458
IPR000683	Oxidoreductase, N-terminal	4	418	4	354
IPR000730	Proliferating cell nuclear antigen	4	419	3	402
IPR000738	WHEP-TRS domain	4	420	5	319
IPR000740	GrpE protein	4	421	4	358
IPR000783	RNA polymerase H/23 kD subunit	4	422	5	320
IPR000923	Type-1 copper (blue) domain	4	423	3	405
IPR001052	Rubredoxin	4	424	3	406
IPR001374	R3H domain	4	425	7	267
IPR001460	Penicillin binding protein transpeptidase domain	4	426	0	Inf
IPR001640	Prolipoprotein diacylglyceryl transferase	4	427	0	Inf
IPR001655	Neutrophil cytosol factor 1	4	428	3	410
IPR001684	Ribosomal protein L27	4	429	3	411
IPR001725	RNA polymerases K/14 to 18 Kd subunits	4	430	2	476
IPR001741	Glucokinase regulatory protein	4	431	1	561
IPR001829	Gram-negative pili assembly chaperone	4	432	2	477
IPR001886	Laminin N-terminal (Domain VI)	4	433	1	567
IPR001949	Respiratory-chain NADH dehydrogenase 51 Kd subunit	4	434	1	569
IPR002192	Pyruvate phosphate dikinase, PEP/pyruvate binding domain	4	435	4	372
IPR002350	Kazal-type serine protease inhibitor domain	4	436	2	485
IPR002500	Phosphoadenosine phosphosulfate reductase	4	437	4	374
IPR002501	Pseudouridylate synthase, TruB family, N-terminus	4	438	2	487
IPR002909	IPT/TIG domain	4	439	3	422
IPR002932	Ferredoxin-dependent glutamate synthase	4	440	3	423
IPR003097	FAD-binding domain	4	441	3	425
IPR003135	ATP-grasp domain	4	442	1	586
IPR003141	PHP domain N-terminal region	4	443	1	587
IPR003148	KTN NAD-binding domain	4	444	2	497
IPR003152	FATC domain	4	445	3	427
IPR003156	DHHA1 domain	4	446	1	590
IPR003307	eIF4-gamma/eIF5/eIF2-epsilon	4	447	7	280
IPR003364	Seryl-tRNA synthetase N-terminal domain	4	448	2	502
IPR003511	HORMA domain	4	449	3	432
IPR003648	Splicing factor motif	4	450	2	505
IPR004010	Cache domain	4	451	0	Inf
IPR004104	Oxidoreductase, C-terminal	4	452	3	440
IPR004342	EXS C-terminus	4	453	13	180
IPR004462	Desulfoferrodoxin FeS4 iron-binding domain	4	454	0	Inf
IPR000001	Kringle	3	455	1	521
IPR000054	Ribosomal protein L31e	3	456	3	387
IPR000089	Biotin / Lipoyl attachment	3	457	3	388
IPR000119	Bacterial histone-like DNA-binding protein	3	458	0	Inf
IPR000156	RanBP1 domain	3	459	5	311
IPR000268	RNA polymerases N/8 Kd subunits	3	460	2	449
IPR000281	Helix-turn-helix domain, RpiR family	3	461	0	Inf
IPR000305	UvrC homology region 1	3	462	3	392
IPR000307	Ribosomal protein S16	3	463	3	393
IPR000396	cAMP phosphodiesterases class-II	3	464	1	530
IPR000421	Coagulation factor 5/8 type C domain (FA58C)	3	465	3	397
IPR000540	Flagellar motor protein MotA	3	466	0	Inf
IPR000758	Virulence-related outer membrane protein	3	467	1	537
IPR000781	Enhancer of rudimentary	3	468	1	539
IPR000814	Transcription factor TFIID	3	469	2	462
IPR000830	Peripherin/rom-1 family	3	470	1	541
IPR000909	Phosphatidylinositol-specific phospholipase C, X domain	3	471	3	404
IPR001040	Eukaryotic translation initiation factor 4E (eIF-4E)	3	472	5	322
IPR001119	S-layer protein (SLH domain)	3	473	2	465
IPR001120	Prokaryotic N-terminal methylation site	3	474	0	Inf
IPR001194	DENN (AEX-3) domain	3	475	3	407
IPR001290	Poly(ADP-ribose) polymerase, catalytic region	3	476	2	466
IPR001309	ICE-like protease (caspase) p20 domain	3	477	2	468
IPR001607	Zn-finger in ubiquitin-hydrolases and other proteins	3	478	7	268
IPR001648	Ribosomal protein S18	3	479	3	409
IPR001653	Diaminopimelate epimerase	3	480	2	473
IPR001796	Dihydrofolate reductase	3	481	3	414
IPR001919	Cellulose-binding domain, bacterial type	3	482	1	568
IPR001989	Radical activating enzymes	3	483	0	Inf
IPR002073	3'5'-cyclic nucleotide phosphodiesterase	3	484	1	571
IPR002126	Cadherin domain	3	485	0	Inf
IPR002288	DNA gyrase, subunit B C-terminus	3	486	2	484
IPR002477	Putative peptidoglycan binding domain 1	3	487	1	576
IPR002539	MaoC-like dehydratase domain	3	488	1	577
IPR002652	Importin beta binding domain	3	489	6	301
IPR002863	DNA mismatch repair protein MutS family, N-terminal domain	3	490	4	376
IPR003014	PAN domain	3	491	2	494
IPR003033	SCP-2 sterol transfer domain	3	492	1	583
IPR003093	Apoptosis regulator protein, Bcl-2 family BH4 domain	3	493	0	Inf
IPR003126	Putative zinc finger in N-recognin	3	494	2	496
IPR003128	Villin headpiece domain	3	495	5	334
IPR003308	Integrase zinc-binding domain	3	496	0	Inf
IPR003338	Amino-terminal subdomain, VAT-Nn	3	497	3	428
IPR003352	Phosphotransferase system, EIIC	3	498	0	Inf
IPR003581	Tail specific protease	3	499	1	595
IPR003595	Protein tyrosine phosphatase, catalytic domain	3	500	4	379
IPR003601	DNA topoisomerase I ATP-binding domain	3	501	3	433
IPR003645	Follistatin-like N-terminal domain	3	502	1	598
IPR003769	DUF174	3	503	2	507
IPR003774	DUF179	3	504	1	607
IPR003823	CP12	3	505	3	436
IPR003829	DUF209	3	506	1	611
IPR003888	FY-rich domain N-terminus	3	507	6	304
IPR003893	Iroquois-class homeodomain protein motif	3	508	2	510
IPR003954	RNA recognition_1	3	509	3	438
IPR004003	NAD(P) transhydrogenase beta subunit	3	510	0	Inf
IPR004017	Domain of unknown function DUF224	3	511	0	Inf
IPR004035	Endonuclease III, FCL	3	512	1	616
IPR004100	ATP synthase alpha and beta subunit, N-terminal	3	513	1	617
IPR004101	Cytoplasmic peptidoglycan synthetases, C-terminal	3	514	1	618
IPR004106	Prolyl oligopeptidase, N-terminal beta-propeller domain	3	515	5	339
IPR004107	Phage integrase N-terminal SAM-like domain	3	516	0	Inf
IPR004112	Fumarate reductase/succinate dehydrogenase flavoprotein, C-terminal	3	517	3	441
IPR004149	NAD-dependent DNA ligase C4 zinc finger domain	3	518	0	Inf
IPR004181	MIZ zinc finger	3	519	2	516
IPR004362	Methylglyoxal synthase-like domain	3	520	2	519
IPR000077	Ribosomal protein L39e	2	521	2	444
IPR000098	Interleukin-10 family	2	522	1	524
IPR000100	Bacterial ribonuclease P protein	2	523	1	525
IPR000191	Formamidopyrimidine-DNA glycolase	2	524	1	527
IPR000271	Ribosomal protein L34	2	525	1	528
IPR000289	Ribosomal protein S28e	2	526	2	451
IPR000299	Band 4.1 family	2	527	0	Inf
IPR000327	'POU' domain	2	528	2	452
IPR000389	Small hydrophilic plant seed protein	2	529	2	454
IPR000392	NifH/frxC family	2	530	3	396
IPR000489	Dihydropteroate synthase	2	531	3	398
IPR000550	7,8-Dihydro-6-hydroxymethylpterin-pyrophosphokinase	2	532	2	457
IPR000591	Pleckstrin putative G-protein interacting domain	2	533	1	535
IPR000627	Intradiol ring-cleavage dioxygenase	2	534	3	401
IPR000675	Cutinase	2	535	2	459
IPR000691	Streptomyces subtilisin-type inhibitor	2	536	0	Inf
IPR000713	Cytoplasmic peptidoglycan synthetases, N-terminal	2	537	0	Inf
IPR000737	Serine protease inhibitor, squash family	2	538	0	Inf
IPR000754	Ribosomal protein S9	2	539	6	292
IPR000779	Interleukin-2	2	540	2	460
IPR000791	GPR1/FUN34/yaaH family	2	541	2	461
IPR000938	CAP-Gly domain	2	542	1	543
IPR000967	Zinc finger NF-X1 type	2	543	1	544
IPR000980	Src homology 2 (SH2) domain	2	544	2	464
IPR000998	MAM domain	2	545	0	Inf
IPR001031	Thioesterase	2	546	0	Inf
IPR001121	Gamma-adaptin, C-terminus	2	547	4	363
IPR001127	Sugar-specific permease, EIIA 1 domain	2	548	0	Inf
IPR001227	Acyl transferase domain	2	549	1	547
IPR001303	Class II Aldolase and Adducin N-terminal domain	2	550	1	548
IPR001378	Uncharacterized protein family UPF0066 (VIRR)	2	551	1	551
IPR001462	Hepadnaviral P protein C-terminal domain	2	552	0	Inf
IPR001523	'Paired box' domain	2	553	2	471
IPR001637	Glutamine synthetase class-I adenylation site	2	554	0	Inf
IPR001662	Elongation factor 1 gamma chain	2	555	2	474
IPR001674	GMP synthase C terminal domain	2	556	1	556
IPR001698	F-actin capping protein beta subunit	2	557	1	557
IPR001706	Ribosomal protein L35	2	558	2	475
IPR001707	Chloramphenicol acetyltransferase	2	559	3	412
IPR001721	C-terminal domain of threonine dehydratase	2	560	1	560
IPR001792	Acylphosphatase	2	561	1	566
IPR001827	'Homeobox' antennapedia-type protein	2	562	5	327
IPR001928	Endothelin and related toxins	2	563	0	Inf
IPR001942	Neuromedin U	2	564	2	478
IPR001960	WH1 domain	2	565	0	Inf
IPR001996	PTS (phosphotransferase system) EIIB domain	2	566	0	Inf
IPR002026	Urease gamma subunit	2	567	1	570
IPR002221	WAP-type (Whey Acidic Protein) four-disulfide core domain	2	568	1	572
IPR002223	Pancreatic trypsin inhibitor (Kunitz)	2	569	2	483
IPR002420	Phosphoinositide 3-kinase C2 domain	2	570	1	573
IPR002483	PWI domain	2	571	2	486
IPR002570	Hpt domain	2	572	2	489
IPR002713	FF domain	2	573	2	490
IPR002719	Retinoblastoma-associated protein B domain	2	574	1	578
IPR002720	Retinoblastoma-associated protein A domain	2	575	1	579
IPR002734	RibD/ribG C-terminal domain	2	576	1	580
IPR002772	Glycoside hydrolase family 3, C terminal	2	577	2	491
IPR002871	NifU-like N terminal domain	2	578	3	421
IPR002894	HypB/UreG nucleotide-binding domain	2	579	1	581
IPR002908	Frataxin-like domain	2	580	1	582
IPR002938	Monooxygenases FAD binding domain	2	581	0	Inf
IPR002993	Ornithine decarboxylase antizyme	2	582	2	492
IPR003123	Vacuolar sorting protein 9 (VPS9) domain	2	583	2	495
IPR003124	WH2 domain	2	584	1	585
IPR003151	FAT domain	2	585	1	589
IPR003162	Transcription factor TAFII-31	2	586	1	591
IPR003221	DNA directed RNA polymerase, 7 kDa subunit	2	587	2	500
IPR003228	Transcription initiation factor TFIID subunit	2	588	2	501
IPR003585	Putative band 4.1 homologue	2	589	0	Inf
IPR003608	MIR domain	2	590	2	504
IPR003610	Chitin-binding domain type 3	2	591	0	Inf
IPR003732	DUF154	2	592	1	600
IPR003746	DUF167	2	593	1	603
IPR003788	DUF185	2	594	1	608
IPR003789	DUF186	2	595	1	609
IPR003798	DUF195	2	596	0	Inf
IPR003838	DUF214	2	597	0	Inf
IPR003858	Surface exposed protein, C-terminus	2	598	0	Inf
IPR003889	FY-rich domain C-terminus	2	599	6	305
IPR004006	Dak kinase domain	2	600	2	511
IPR004011	GYR motif	2	601	0	Inf
IPR004015	SKIP/SNW domain	2	602	1	614
IPR004016	ERCC4 domain	2	603	3	439
IPR004098	Prp18 domain	2	604	2	514
IPR004111	Tetracyclin repressor, C-terminal	2	605	0	Inf
IPR004125	Signal peptide binding (SRP54) M-domain	2	606	4	384
IPR004163	Coenzyme A transferase 1	2	607	0	Inf
IPR004192	Ubiquinol cytochrome reductase transmembrane region	2	608	2	517
IPR004198	C5HC2 zinc finger	2	609	6	308
IPR004328	BRO1-like domain	2	610	1	623
IPR004568	Phosphopantethiene-protein transferase domain	2	611	0	Inf
IPR004606	Molybdenum-pterin binding domain	2	612	0	Inf
IPR004675	Alkylhydroperoxidase AhpD family core domain	2	613	1	626
IPR000055	Restriction modification system, type I	1	614	0	Inf
IPR000157	TIR domain	1	615	116	16
IPR000177	Apple domain	1	616	0	Inf
IPR000219	Dbl domain (dbl/cdc24 rhoGEF family)	1	617	2	448
IPR000237	GRIP domain	1	618	0	Inf
IPR000293	Channel forming colicins	1	619	0	Inf
IPR000320	Hedgehog amino-terminal signaling domain	1	620	0	Inf
IPR000334	Glycoside hydrolase family 45	1	621	0	Inf
IPR000342	Regulator of G Protein Signaling (RGS) domain	1	622	1	529
IPR000359	Cystine-knot domain	1	623	0	Inf
IPR000445	Helix-hairpin-helix motif	1	624	1	532
IPR000532	Glucagon / GIP / secretin / VIP family	1	625	2	455
IPR000601	PKD domain	1	626	0	Inf
IPR000773	Granulocyte-macrophage colony-stimulating factor	1	627	1	538
IPR000800	Notch (DSL) domain	1	628	0	Inf
IPR000857	Core domain in kinesin and myosin motors	1	629	1	542
IPR000867	Insulin-like growth factor-binding protein	1	630	0	Inf
IPR000949	ELM2 domain	1	631	6	295
IPR000962	Prokaryotic dksA/traR C4-type zinc finger	1	632	0	Inf
IPR001054	Guanylate cyclase	1	633	0	Inf
IPR001162	Excinuclease ABC subunit C domain 2	1	634	1	546
IPR001240	N-(5'phosphoribosyl)anthranilate isomerase (PRAI)	1	635	3	408
IPR001346	Interferon regulatory factor family	1	636	0	Inf
IPR001505	Cu(A) centre of cytochrome c oxidase, subunit II and nitrous oxide reductase	1	637	1	553
IPR001699	T-box domain	1	638	1	558
IPR001705	Ribosomal protein L33	1	639	1	559
IPR001761	Periplasmic binding proteins and sugar binding domain, LacI family	1	640	0	Inf
IPR001875	Death effector domain	1	641	0	Inf
IPR002172	Low density lipoprotein (LDL)-receptor class A (LDLRA) domain	1	642	0	Inf
IPR002178	phosphoenolpyruvate-dependent sugar phosphotransferase system, EIIA 2	1	643	0	Inf
IPR002474	Carbamoyl-phosphate synthase small chain	1	644	1	575
IPR002545	CheW-like domain	1	645	0	Inf
IPR002558	I/LWEQ domain	1	646	2	488
IPR002563	Flavin reductase-like domain	1	647	0	Inf
IPR002620	Alphavirus nonstructural protein nsP1	1	648	0	Inf
IPR002819	HD domain	1	649	0	Inf
IPR002865	LexA DNA binding domain	1	650	0	Inf
IPR002883	Cellulose-binding domain	1	651	0	Inf
IPR003114	Domain associated with PX domains	1	652	0	Inf
IPR003115	ParB-like nuclease domain	1	653	1	584
IPR003122	Tar ligand binding domain	1	654	0	Inf
IPR003166	TFIIE beta subunit core domain	1	655	2	499
IPR003219	Cytochrome c, alcohol dehydrogenase-like subunit	1	656	0	Inf
IPR003257	Bacterial NUSG	1	657	0	Inf
IPR003327	Myc leucine zipper	1	658	1	593
IPR003343	Bacterial Ig-like domain (group 2)	1	659	1	594
IPR003456	Domain of unknown function DUF143	1	660	2	503
IPR003599	Immunoglobulin subtype	1	661	1	596
IPR003605	GS motif preceding kinase domain in TGF beta receptor	1	662	0	Inf
IPR003622	Potential DAG-kinase catalytic domain	1	663	1	597
IPR003665	Type I restriction-modification system, M subunit	1	664	0	Inf
IPR003712	Cyanate lyase, C-terminal	1	665	1	599
IPR003727	DUF149	1	666	2	506
IPR003729	DUF151	1	667	0	Inf
IPR003742	DUF163	1	668	1	602
IPR003749	DUF170	1	669	1	604
IPR003750	DUF171	1	670	1	605
IPR003776	DUF181	1	671	0	Inf
IPR003790	DUF187	1	672	0	Inf
IPR003796	DUF193	1	673	0	Inf
IPR003808	UPF0050_DUF	1	674	2	508
IPR003810	DUF204	1	675	0	Inf
IPR003827	DUF207	1	676	1	610
IPR003828	DUF208	1	677	0	Inf
IPR003834	Cytochrome c biogenesis protein transmembrane region	1	678	0	Inf
IPR003863	Domain of unknown function DUF220	1	679	15	158
IPR003879	Butyrophylin C-terminal DUF	1	680	0	Inf
IPR004007	Dak phosphatase domain	1	681	2	512
IPR004013	PHP domain C-terminal region	1	682	1	613
IPR004027	SEC-C motif	1	683	1	615
IPR004108	Hydrogenase large subunit, C-terminal	1	684	1	619
IPR004114	THUMP domain	1	685	0	Inf
IPR004115	GAD domain	1	686	1	620
IPR004164	Coenzyme A transferase 2	1	687	0	Inf
IPR004170	WWE domain	1	688	2	515
IPR004177	DDHD domain	1	689	1	622
IPR004184	Pyruvate formate-lyase	1	690	0	Inf
IPR004199	Beta galactosidase small chain N terminus	1	691	0	Inf
IPR004200	Beta galactosidase small chain C terminus	1	692	0	Inf
IPR004302	Spheroidin/spindolin	1	693	0	Inf
IPR004305	TENA/THI-4 protein	1	694	2	518
IPR004457	ZPR1 zinc finger domain	1	695	2	520
IPR004495	Methionyl-tRNA synthetase C-terminal region beta subunit	1	696	0	Inf
IPR004521	Uncharacterized domain 2	1	697	1	624
IPR004646	Fe-S type hydro-lyases tartrate/fumarate alpha region	1	698	0	Inf
IPR004647	Fe-S type hydro-lyases tartrate/fumarate beta region	1	699	0	Inf
IPR003871	Domain of unknown function DUF223	0	Inf	56	55
IPR002049	Laminin-type EGF-like (LE) domain	0	Inf	7	275
IPR003164	Alpha adaptin carboxyl-terminal domain	0	Inf	2	498
IPR004036	Endonuclease III, HhH	0	Inf	2	513
IPR000050	Phosphotyrosine interaction (PID or PI)	0	Inf	1	523
IPR000418	Ets-domain	0	Inf	1	531
IPR000538	Link domain	0	Inf	1	534
IPR000712	Apoptosis regulator protein, Bcl-2 family BH domain	0	Inf	1	536
IPR001138	Fungal transcriptional regulatory protein, N-terminus	0	Inf	1	545
IPR001319	Nuclear transition protein 1	0	Inf	1	549
IPR001639	Bacterial type II secretion system protein C	0	Inf	1	554
IPR001751	S-100/ICaBP type calcium binding protein	0	Inf	1	563
IPR001762	Disintegrin	0	Inf	1	565
IPR002466	Adenosine-deaminase (editase) domain	0	Inf	1	574
IPR003142	Biotin protein ligase C terminal domain	0	Inf	1	588
IPR003312	B12 binding domain	0	Inf	1	592
IPR003738	DUF159	0	Inf	1	601
IPR003772	DUF177	0	Inf	1	606
IPR004008	Ku domain	0	Inf	1	612
IPR004119	Domain of unknown function DUF227	0	Inf	1	621
IPR004635	Signal peptide peptidase SppA 36K type	0	Inf	1	625

## Sheet: Beijing_FgeneSH_VS_nr-KOME_190
	Ab initio vs cDNAs	FgeneSH(Beijing)		nr-KOME
	# of Genes in data set	49088		19079
	# with Interpro_ID	14407		5919
Interpro_ID	Domain_Name	Genes	Rank	Genes	Rank
IPR002219	Phorbol esters/diacylglycerol binding domain	836	1	333	1
IPR001810	F-box domain	809	2	269	2
IPR001170	Natriuretic peptides receptor, N-terminus	641	3	194	5
IPR002182	NB-ARC domain	453	4	86	13
IPR001841	RING finger	435	5	233	3
IPR001899	Gram-positive cocci surface protein 'anchoring' hexapeptide	424	6	151	6
IPR000477	RNA-directed DNA polymerase (Reverse transcriptase)	384	7	7	191
IPR001005	Myb DNA binding domain	373	8	118	9
IPR000345	Cytochrome c family heme-binding site	372	9	144	7
IPR000504	RNA-binding region RNP-1 (RNA recognition motif)	341	10	203	4
IPR003885	Leucine-rich repeat cysteine-containing subfamily	307	11	62	20
IPR001084	Microtubule associated Tau protein	278	12	101	12
IPR002048	EF-hand	255	13	115	11
IPR000822	Zinc finger, C2H2 type	253	14	115	10
IPR001230	Prenyl group binding site (CAAX box)	251	15	130	8
IPR003439	ABC transporter	241	16	59	21
IPR003163	Yeast DNA-binding domain	192	17	68	17
IPR003015	Myc-type, helix-loop-helix dimerization domain	185	18	66	18
IPR000210	BTB/POZ domain	178	19	49	28
IPR001471	AP2 domain/ethylene responsive element binding protein	170	20	52	24
IPR000561	EGF-like domain	163	21	47	31
IPR000169	Eukaryotic thiol (cysteine) proteases active site	155	22	49	27
IPR003612	Plant lipid transfer/seed storage/trypsin-alpha amylase inhibitor domain	138	23	70	15
IPR001623	DnaJ N-terminal domain	126	24	69	16
IPR000637	HMG-I and HMG-Y DNA-binding domain (A+T-hook)	125	25	52	23
IPR001589	Actinin-type actin-binding domain	124	26	41	36
IPR001092	Basic helix-loop-helix dimerization domain (bHLH)	118	27	50	25
IPR001934	Heavy-metal-associated domain	116	28	44	33
IPR003006	Immunoglobulin and major histocompatibility complex domain	112	29	36	41
IPR000424	Single-strand binding protein family	110	30	62	19
IPR001007	von Willebrand factor, type C repeat	108	31	37	40
IPR003657	WRKY DNA binding domain	106	32	36	42
IPR003609	Divergent subfamily of APPLE domain	105	33	25	63
IPR002078	Sigma-54 factor interaction domain	104	34	70	14
IPR001064	Crystallin	100	35	38	37
IPR001650	Helicase C-terminal domain	97	36	50	26
IPR000008	C2 domain	95	37	56	22
IPR000626	Ubiquitin domain	95	38	48	29
IPR001356	Homeobox domain	94	39	38	38
IPR004330	FAR1 protein	94	40	18	88
IPR000097	AP endonucleases family 1	92	41	10	137
IPR000953	Chromo domain	92	42	9	158
IPR001932	Protein phosphatase 2C domain	91	43	47	32
IPR004045	Glutathione S-transferase N terminus	89	44	48	30
IPR000130	Neutral zinc metallopeptidases, zinc-binding region	88	45	29	51
IPR000531	TonB-dependent receptor protein	83	46	30	49
IPR002083	Meprin and TRAF Homology domain (MATH)	81	47	14	105
IPR004332	Plant MuDR transposase	81	48	7	204
IPR002100	MADS-box domain	79	49	22	66
IPR004046	Glutathione S-transferase C terminus	79	50	43	35
IPR002168	Lipolytic enzymes	78	51	43	34
IPR001881	Calcium-binding EGF-like domain	73	52	18	87
IPR000571	Zinc finger C-x8-C-x5-C-x3-H type	69	53	33	45
IPR001789	Response regulator receiver domain	69	54	16	96
IPR002528	Uncharacterized domain UPF0013	69	55	31	48
IPR001965	PHD-finger	68	56	31	47
IPR003594	Histidine kinase-, DNA gyrase B-, phytochrome-like ATPase	68	57	22	68
IPR003613	Modified RING finger domain	68	58	38	39
IPR001220	Legume lectin beta domain	66	59	28	53
IPR000063	Thioredoxin	63	60	33	44
IPR003245	Plant cyanin copper (blue) type domain	61	61	26	61
IPR001752	Kinesin motor domain	60	62	27	58
IPR001929	Germin	60	63	25	62
IPR003137	Protease associated (PA) domain	60	64	26	60
IPR001917	Aminotransferases class-II	58	65	20	76
IPR004253	DUF231 domain	58	66	34	43
IPR000070	Pectinesterase	53	67	29	50
IPR000689	UbiH/COQ6 monooxygenase family	53	68	27	57
IPR000629	ATP-dependent helicase, DEAD-box	51	69	27	56
IPR000644	CBS domain	51	70	24	65
IPR000743	Glycoside hydrolase family 28	51	71	28	52
IPR000623	Shikimate kinase	50	72	21	70
IPR001343	Hemolysin-type calcium-binding region	50	73	8	176
IPR001575	FAD linked oxidase, N-terminal	50	74	14	104
IPR000608	Ubiquitin-conjugating enzymes	47	75	31	46
IPR000194	ATP synthase alpha and beta subunit, central region	46	76	24	64
IPR000595	Cyclic nucleotide-binding domain	44	77	17	89
IPR003656	BED finger	43	78	9	166
IPR004087	KH domain	41	79	22	69
IPR000449	Ubiquitin-associated domain	40	80	27	55
IPR000985	Legume lectin alpha domain	37	81	13	109
IPR001895	Guanine-nucleotide dissociation stimulators CDC25 family	37	82	27	59
IPR000005	AraC type helix-turn-helix	36	83	8	169
IPR001214	SET-domain of transcriptional regulators (TRX, EZ, ASH1 etc)	36	84	21	71
IPR001825	ADP-glucose pyrophosphorylase	36	85	19	83
IPR002162	D-isomer specific 2-hydroxyacid dehydrogenase	36	86	20	77
IPR003660	HAMP domain	36	87	2	432
IPR000849	GlpT family of transporters	35	88	13	108
IPR001849	Pleckstrin homology (PH) domain	35	89	19	84
IPR000432	DNA mismatch repair protein MutS family, C-terminal domain	34	90	12	118
IPR001229	Jacalin-related lectin domain	34	91	6	213
IPR002035	von Willebrand factor type A domain	34	92	12	121
IPR000727	Target SNARE coiled-coil domain	33	93	19	80
IPR000897	GTP-binding signal recognition particle (SRP54) G-domain	33	94	16	93
IPR001753	Enoyl-CoA hydratase/isomerase	33	95	15	99
IPR000086	NUDIX hydrolase	32	96	18	85
IPR001251	Cellular retinaldehyde-binding protein (CRAL)/Triple function domain (TRIO)	32	97	20	73
IPR000774	Domain amino terminal to FKBP-type peptidyl-prolyl isomerase	31	98	20	72
IPR001320	Ionotropic glutamate receptor	31	99	7	193
IPR001737	Ribosomal RNA adenine dimethylase	31	100	19	82
IPR002912	ACT domain	31	101	20	78
IPR004314	Arabidopsis DUF239 protein	31	102	6	226
IPR000330	SNF2 related domain	30	103	16	92
IPR001487	Bromodomain	30	104	16	95
IPR001763	Rhodanese/cdc25 fold	30	105	11	130
IPR000315	B-box zinc finger domain	29	106	16	91
IPR000679	GATA-type zinc finger domain	29	107	11	127
IPR001073	Complement C1q protein	29	108	18	86
IPR001510	Poly(ADP-ribose) polymerase zinc finger domain	29	109	9	159
IPR002130	Cyclophilin-type peptidyl-prolyl cis-trans isomerase	29	110	22	67
IPR000232	Heat shock factor (HSF)-type DNA-binding domain	28	111	19	79
IPR000583	Glutamine amidotransferase class-II	28	112	10	139
IPR000886	Endoplasmic reticulum targeting sequence	28	113	19	81
IPR002464	ATP-dependent helicase, DEAH-box	28	114	12	122
IPR002482	LysM motif	28	115	8	179
IPR004161	Elongation factor Tu domain 2	28	116	28	54
IPR001678	NOL1/NOP2/sun family	27	117	13	113
IPR004359	Histidine kinase C-terminal	27	118	4	299
IPR001357	BRCT domain	26	119	16	94
IPR003029	S1 RNA binding domain	26	120	12	123
IPR003851	Dof zinc finger	26	121	13	114
IPR000014	PAS domain	25	122	5	227
IPR000672	Tetrahydrofolate dehydrogenase/cyclohydrolase	25	123	9	156
IPR000965	Gamma-glutamyl phosphate reductase	24	124	17	90
IPR001159	Double-stranded RNA binding (DsRBD) domain	24	125	13	111
IPR001594	DHHC-type Zn-finger	24	126	20	74
IPR000292	Formate and nitrite transporters	23	127	9	154
IPR001002	Chitin-binding domain	23	128	14	103
IPR001313	Pumilio-family RNA binding domains (aka PUM-HD, Pumilio homology domain)	23	129	11	129
IPR001876	Zn-finger in ranbp and others	23	130	20	75
IPR002939	DnaJ C terminal domain	23	131	14	106
IPR003104	Formin Homology 2 Domain	23	132	10	149
IPR001433	Oxidoreductase FAD and NAD(P)-binding domain	22	133	13	112
IPR001478	PDZ domain (also known as DHR or GLGF)	22	134	12	120
IPR002913	START domain	22	135	9	163
IPR000160	Domain of unknown function, DUF9	21	136	0	Inf
IPR001858	Phosphatidylethanolamine-binding protein family	21	137	4	276
IPR002135	3-hydroxyacyl-CoA dehydrogenase	21	138	9	162
IPR003616	Post-SET domain	21	139	12	124
IPR003661	Histidine kinase A, N-terminal	21	140	3	353
IPR004367	Cyclin C-terminus	21	141	13	115
IPR000717	Domain in components of the proteasome, COP9-complex and eIF3 (PCI)	20	142	14	102
IPR001202	WW / rsp5 / WWP domain	20	143	10	142
IPR003016	2-oxo acid dehydrogenases acyltransferase component lipoyl binding site	20	144	15	100
IPR003100	PAZ domain	20	145	8	183
IPR003958	Transcription factor (CBF/NF-Y) and archaeal histone	20	146	8	186
IPR000195	RabGAP/TBC domain	19	147	14	101
IPR000304	Delta 1-pyrroline-5-carboxylate reductase	19	148	13	107
IPR000804	Clathrin adaptor complex, small chain	19	149	11	128
IPR001450	4Fe-4S ferredoxin, iron-sulfur binding domain	19	150	8	177
IPR002942	S4 domain	19	151	9	164
IPR004333	SBP plant protein domain	19	152	11	134
IPR000306	FYVE Zn-finger, rabphilin/VPS27/FAB1 type	18	153	7	190
IPR000760	Inositol monophosphatase	18	154	8	173
IPR001024	Lipoxygenase, region 2	18	155	10	141
IPR001609	Myosin head (motor domain)	18	156	4	271
IPR003165	Piwi domain	18	157	7	200
IPR003617	Domain in N-terminus of transcription elongation factor S-II (and elsewhere)	18	158	4	291
IPR003961	Fibronectin type III domain	18	159	10	151
IPR004014	Cation transporter ATPase	18	160	7	203
IPR004182	GRAM domain	18	161	12	125
IPR000058	AN1-like Zinc finger	17	162	10	136
IPR000062	Thymidylate kinase	17	163	5	228
IPR000302	Ribosomal protein L24/bacterial NUSG	17	164	12	117
IPR000524	Bacterial regulatory proteins, GntR family	17	165	6	208
IPR001045	Spermidine synthase	17	166	12	119
IPR001199	Cytochrome b5	17	167	15	98
IPR001764	Glycoside hydrolase family 3, N terminal	17	168	8	178
IPR002199	Uncharacterized protein family UPF0005	17	169	10	146
IPR000253	Forkhead-associated (FHA) domain	16	170	12	116
IPR000283	Respiratory-chain NADH dehydrogenase 75 Kd subunit	16	171	7	189
IPR000385	MoaA / nifB / pqqE family	16	172	4	261
IPR000594	UBA/THIF-type NAD/FAD binding fold	16	173	3	309
IPR001025	BAH (bromo-adjacent homology) domain	16	174	8	174
IPR001026	Epsin N-terminal homology (ENTH) domain	16	175	13	110
IPR001587	Uncharacterized protein UPF0036	16	176	6	215
IPR001633	Domain of unknown function 2	16	177	2	398
IPR001652	NAD-dependent glycerol-3-phosphate dehydrogenase	16	178	9	160
IPR001882	Biotin-requiring enzymes attachment site.	16	179	10	144
IPR003753	Exonuclease VII, large subunit	16	180	11	133
IPR000092	Polyprenyl synthetase	15	181	9	152
IPR000166	Histone-fold/TFIID-TAF/NF-Y domain	15	182	5	230
IPR000558	Histone H2B	15	183	0	Inf
IPR001012	UBX domain	15	184	6	211
IPR001541	SUR2-type hydroxylase/desaturase catalytic domain	15	185	10	143
IPR001663	Bacterial ring hydroxylating dioxygenases alpha-subunit	15	186	6	217
IPR002645	STAS domain	15	187	8	180
IPR002934	DNA polymerase beta-like domain	15	188	4	282
IPR003034	SAP domain	15	189	10	148
IPR003280	Two pore domain of K+ channel	15	190	4	286
IPR003347	jmjC domain	15	191	9	165
IPR003606	N-terminal to some SET domains	15	192	11	132
IPR004331	SPX, N-terminal	15	193	9	168
IPR004365	OB-fold nucleic acid binding domain	15	194	11	135
IPR000095	PAK-box /P21-Rho-binding	14	195	6	205
IPR000173	Glyceraldehyde 3-phosphate dehydrogenase	14	196	10	138
IPR000467	D111/G-patch domain	14	197	6	207
IPR000782	Beta-Ig-H3/Fasciclin domain	14	198	10	140
IPR000792	Bacterial regulatory protein, LuxR family	14	199	1	479
IPR000838	Sigma factor, ECF subfamily	14	200	4	264
IPR000842	Phosphoribosyl pyrophosphate synthetase	14	201	9	157
IPR001206	DAG-kinase catalytic domain (presumed)	14	202	8	175
IPR001739	Methyl-CpG binding domain	14	203	5	239
IPR002028	Tryptophan synthase alpha chain	14	204	3	334
IPR004156	Organic Anion Transporter Polypeptide (OATP) N-terminus	14	205	3	359
IPR000262	FMN-dependent alpha-hydroxy acid dehydrogenases	13	206	8	170
IPR000352	Class I peptide chain release factor	13	207	5	232
IPR000403	Phosphatidylinositol 3- and 4-kinase	13	208	2	381
IPR000843	Bacterial regulatory protein, LacI family	13	209	0	Inf
IPR001745	GHMP kinases putative ATP-binding domain	13	210	6	219
IPR001951	Histone H4	13	211	16	97
IPR002625	Smr domain	13	212	10	147
IPR002710	Dilute (DIL) domain	13	213	3	338
IPR002925	Dienelactone hydrolase	13	214	7	199
IPR002999	Tudor domain	13	215	8	182
IPR003105	G9a domain	13	216	10	150
IPR004099	Pyridine nucleotide-disulphide oxidoreductase dimerisation domain	13	217	4	294
IPR000164	Histone H3	12	218	4	257
IPR000287	Arginase family	12	219	3	304
IPR000313	PWWP domain	12	220	4	260
IPR000922	D-galactoside/L-rhamnose binding SUEL lectin domain	12	221	6	210
IPR001093	IMP dehydrogenase / GMP reductase	12	222	3	319
IPR001305	DnaJ central domain (CXXCXGXG)	12	223	6	214
IPR001977	Uncharacterized protein family UPF0038	12	224	11	131
IPR002014	VHS domain	12	225	10	145
IPR003035	RWP-RK domain	12	226	5	249
IPR003583	Helix-hairpin-helix DNA-binding motif class 1	12	227	4	289
IPR004009	Myosin N-terminal SH3-like domain	12	228	2	439
IPR000198	RhoGAP domain	11	229	9	153
IPR000326	PA-phosphatase related phosphoesterase	11	230	9	155
IPR000433	ZZ Zinc finger	11	231	6	206
IPR000535	Major sperm protein (MSP) domain	11	232	11	126
IPR001715	Calponin homology (CH) domain	11	233	4	274
IPR001727	Uncharacterized protein family UPF0016	11	234	7	196
IPR001781	LIM domain	11	235	9	161
IPR002108	Cofilin/tropomyosin-type actin-binding protein	11	236	7	198
IPR002867	Cysteine-rich domain (C6HC)	11	237	8	181
IPR003018	GAF domain	11	238	4	283
IPR000551	Bacterial regulatory proteins, MerR family	10	239	0	Inf
IPR001920	Aspartate and glutamate racemases	10	240	7	197
IPR001943	UvrB/uvrC motif	10	241	6	220
IPR002125	Cytidine and deoxycytidylate deaminase zinc-binding region	10	242	6	221
IPR003121	BAF60b domain of the SWIB complex	10	243	6	223
IPR003349	jmjN domain	10	244	4	287
IPR003607	Metal dependent phosphohydrolase HD domain	10	245	2	427
IPR003864	Domain of unknown function DUF221	10	246	9	167
IPR003890	Middle domain of eIF4G	10	247	5	253
IPR004152	GAT domain	10	248	8	187
IPR000244	Ribosomal protein L9	9	249	3	303
IPR000612	Uncharacterized protein family UPF0057	9	250	4	263
IPR000741	Fructose-bisphosphate aldolase, class-I	9	251	8	172
IPR001030	Aconitate hydratase, N-terminal	9	252	2	395
IPR001078	2-Oxo acid dehydrogenase acyltransferase catalytic domain	9	253	6	212
IPR001828	Receptor family ligand binding region	9	254	4	275
IPR001880	Uncharacterized protein family UPF0003	9	255	3	330
IPR002202	Hydroxymethylglutaryl-coenzyme A reductase	9	256	4	279
IPR002346	FAD binding domain in molybdopterin dehydrogenase	9	257	2	407
IPR003103	Domain present in Hsp70 regulator	9	258	4	284
IPR003106	Homeobox associated leucine zipper	9	259	2	415
IPR003111	ATP-dependent protease La (LON) domain	9	260	3	345
IPR003130	Dynamin GTPase effector domain	9	261	8	184
IPR003216	Linker histone, N-terminus	9	262	7	201
IPR003231	Acyl carrier protein (ACP)	9	263	4	285
IPR003305	Cellulose binding domain	9	264	3	347
IPR003892	CUE domain	9	265	8	185
IPR004146	DC1 domain	9	266	4	295
IPR004154	Anticodon binding domain	9	267	8	188
IPR004157	Organic Anion Transporter Polypeptide (OATP) C-terminus	9	268	2	444
IPR004274	NLI interacting factor	9	269	4	298
IPR000266	Ribosomal protein S17	8	270	2	372
IPR000291	D-alanine--D-alanine ligase	8	271	1	461
IPR000308	14-3-3 proteins	8	272	8	171
IPR000485	Bacterial regulatory proteins, AsnC family	8	273	1	468
IPR000569	HECT domain (Ubiquitin-protein ligase)	8	274	6	209
IPR000756	Diacylglycerol kinase accessory domain (presumed)	8	275	7	192
IPR000808	Mrp family	8	276	2	391
IPR000904	SEC7-like domain	8	277	0	Inf
IPR001145	Bacterial outer membrane protein	8	278	0	Inf
IPR001304	C-type lectin domain	8	279	4	268
IPR001331	Guanine-nucleotide dissociation stimulators CDC24 family	8	280	7	194
IPR001608	Uncharacterized pyridoxal-5'-phosphate dependent enzyme family UPF0001	8	281	1	496
IPR001660	SAM domain (Sterile alpha motif)	8	282	6	216
IPR001683	PX (Bem1/NCF1/PI3K) domain	8	283	6	218
IPR001823	Aldose 1-epimerase	8	284	5	241
IPR001852	Uncharacterized protein family UPF0019	8	285	3	329
IPR001884	Eukaryotic initiation factor 5A hypusine (eIF-5A)	8	286	5	242
IPR001950	Translation initiation factor SUI1	8	287	5	244
IPR002013	Synaptojanin N-terminal domain	8	288	5	246
IPR002075	Nuclear transport factor 2 (NTF2)	8	289	3	335
IPR002197	Helix-turn-helix Fis-type	8	290	0	Inf
IPR002478	PUA domain	8	291	5	248
IPR002888	[2Fe-2S] binding domain	8	292	2	413
IPR003453	Domain of unknown function DUF140	8	293	3	350
IPR003584	Helix-hairpin-helix motif class 2 (Pol1-type)	8	294	5	250
IPR003602	DNA topoisomerase I DNA-binding domain	8	295	2	426
IPR003725	Molybdenum-binding protein, N-terminal	8	296	0	Inf
IPR003891	MA3 domain	8	297	7	202
IPR004176	Clp amino terminus	8	298	6	225
IPR004193	Isoamylase N-terminus	8	299	3	361
IPR000061	SWAP / SURP	7	300	3	300
IPR000189	SLT domain	7	301	0	Inf
IPR000285	Bacterial regulatory proteins, IclR family	7	302	0	Inf
IPR000297	PpiC-type peptidyl-prolyl cis-trans isomerase	7	303	2	374
IPR000529	Ribosomal protein S6	7	304	4	262
IPR000543	YER057c/YjgF/UK114 family	7	305	2	383
IPR000772	Ricin B lectin domain	7	306	3	312
IPR001691	Glutamine synthetase	7	307	3	324
IPR001731	Delta-aminolevulinic acid dehydratase	7	308	2	402
IPR001822	Site-specific recombinase	7	309	3	328
IPR001900	Ribonuclease II domain	7	310	3	332
IPR002020	Citrate synthase	7	311	3	333
IPR002121	HRDC domain	7	312	2	406
IPR002205	DNA gyrase/topoisomerase IV, subunit A	7	313	3	336
IPR002376	Formyl transferase N-terminus	7	314	2	408
IPR002687	Putative snoRNA binding domain	7	315	6	222
IPR003169	GYF domain	7	316	1	535
IPR003843	UPF0010_DUF	7	317	3	356
IPR004217	Tim10/DDP zinc finger	7	318	4	297
IPR000114	Ribosomal protein L16	6	319	3	301
IPR000127	Ubiquitin-activating enzyme repeat domain	6	320	3	302
IPR000206	Ribosomal protein L7/L12 C-terminal domain	6	321	5	231
IPR000218	Ribosomal protein L14b/L23e family	6	322	2	370
IPR000294	Vitamin K-dependent carboxylation/gamma-carboxyglutamic (GLA) domain	6	323	4	259
IPR000365	4-hydroxybenzoyl-CoA thioesterase family active site	6	324	0	Inf
IPR000409	Beige/BEACH domain	6	325	1	466
IPR000517	Ribosomal protein L30	6	326	5	233
IPR000692	Fibrillarin	6	327	2	386
IPR000716	Thyroglobulin type-1 repeat	6	328	1	476
IPR000793	ATP synthase alpha and beta subunit, C-terminal	6	329	5	236
IPR000961	Protein kinase C-terminal domain	6	330	3	316
IPR001075	Nitrogen-fixing protein NifU	6	331	5	237
IPR001094	Flavodoxin-like domain	6	332	4	265
IPR001104	Steroid 5-alpha reductase, C-terminal domain	6	333	3	320
IPR001212	Somatomedin B domain	6	334	4	266
IPR001293	TRAF-type zinc finger	6	335	2	397
IPR001452	Src homology 3 (SH3) domain	6	336	4	270
IPR001468	Indole-3-glycerol phosphate synthase	6	337	3	321
IPR001606	AT-rich interaction domain (ARID)	6	338	5	238
IPR001772	Kinase associated domain 1	6	339	5	240
IPR001910	Inosine-uridine preferring nucleoside hydrolase	6	340	5	243
IPR002004	Poly-adenylate binding protein, unique domain	6	341	5	245
IPR002715	Nascent polypeptide Associated Complex (NAC) domain	6	342	4	280
IPR002893	MYND zinc finger (ZnF) domain	6	343	3	340
IPR003131	K+ channel tetramerisation domain	6	344	1	532
IPR003582	ShK toxin domain	6	345	3	351
IPR003604	U1-like zinc finger	6	346	5	251
IPR003611	Intron-encoded nuclease repeat 2	6	347	2	429
IPR003736	DUF157	6	348	3	354
IPR003811	DUF205	6	349	1	551
IPR003832	DUF212	6	350	3	355
IPR004022	DDT domain	6	351	1	555
IPR004095	TGS domain	6	352	4	293
IPR004160	Elongation factor Tu C-terminal domain	6	353	4	296
IPR004167	E3 binding domain	6	354	6	224
IPR004179	Sec63 domain	6	355	2	445
IPR000002	Cdc20/Fizzy	5	356	4	254
IPR000004	Saposin type B	5	357	4	255
IPR000118	Granulin	5	358	5	229
IPR000181	Formylmethionine deformylase	5	359	1	456
IPR000214	Formamidopyrimidine-DNA glycolase, zinc binding domain	5	360	2	369
IPR000347	Metallothionein (family 15)	5	361	3	306
IPR000358	Ribonucleotide reductase	5	362	2	377
IPR000374	Phosphatidate cytidylyltransferase	5	363	2	378
IPR000544	Lipoate-protein ligase B	5	364	2	384
IPR000568	ATP synthase A subunit	5	365	3	307
IPR000702	Ribosomal protein L6	5	366	5	234
IPR000704	Casein kinase II, regulatory subunit	5	367	0	Inf
IPR000705	Galactokinase	5	368	2	387
IPR000711	ATP synthase, delta (OSCP) subunit	5	369	1	474
IPR000911	Ribosomal protein L11	5	370	3	315
IPR001222	TFIIS zinc ribbon domain	5	371	4	267
IPR001347	SIS domain	5	372	1	491
IPR001368	TNFR/CD27/30/40/95 cysteine-rich region	5	373	7	195
IPR001381	Dehydroquinase class I active site	5	374	1	494
IPR001645	Folylpolyglutamate synthetase	5	375	3	323
IPR001651	Gastrin/cholecystokinin family	5	376	2	399
IPR001694	Respiratory-chain NADH dehydrogenase subunit 1	5	377	3	325
IPR001748	G10 protein	5	378	3	326
IPR001754	Orotidine 5'-phosphate decarboxylase	5	379	2	403
IPR001765	Prokaryotic-type carbonic anhydrase	5	380	3	327
IPR001783	Riboflavin synthase alpha chain family lumazine binding domain	5	381	0	Inf
IPR001890	Uncharacterized protein family UPF0044	5	382	3	331
IPR001983	Translationally controlled tumor protein	5	383	1	507
IPR001999	Osteonectin domain	5	384	4	277
IPR002044	Glycosyl hydrolase, starch-binding domain	5	385	5	247
IPR002059	Cold-shock DNA-binding domain	5	386	2	405
IPR002369	Integrins, beta chain	5	387	1	516
IPR002547	Putative tRNA binding domain	5	388	2	409
IPR002735	Domain found in IF2B/IF5	5	389	3	339
IPR002781	Domain of unknown function DUF81	5	390	4	281
IPR002936	Toprim domain	5	391	1	528
IPR002994	SURF1 family	5	392	3	343
IPR003348	Anion-transporting ATPase	5	393	2	422
IPR003395	SMC domain N terminal domain	5	394	0	Inf
IPR003405	SMC family, C-terminal domain	5	395	2	423
IPR003603	Motif occurring C-terminal to leucine-rich repeats	5	396	4	290
IPR003618	Domain in central region of transcription elongation factor S-II (and elsewhere)	5	397	4	292
IPR003651	Iron-sulfur cluster loop (FCL)	5	398	2	431
IPR003781	DUF184	5	399	1	548
IPR003877	SPla and the RYanodine Receptor (SPRY)	5	400	5	252
IPR003953	Fumarate reductase/succinate dehydrogenase flavoprotein, N-terminal	5	401	2	438
IPR004343	Plus-3	5	402	2	450
IPR004361	Glyoxalase I	5	403	3	363
IPR000020	Anaphylatoxin/Fibulin	4	404	1	453
IPR000049	Electron transfer flavoprotein beta-subunit	4	405	1	454
IPR000131	ATP synthase gamma subunit	4	406	4	256
IPR000139	Antitermination protein NusB	4	407	2	365
IPR000170	High potential iron-sulfur protein	4	408	0	Inf
IPR000196	Ribosomal protein L19e	4	409	1	457
IPR000197	TAZ finger	4	410	2	368
IPR000235	Ribosomal protein S7	4	411	4	258
IPR000257	Uroporphyrinogen decarboxylase (URO-D)	4	412	2	371
IPR000267	Asparaginase/glutaminase family	4	413	0	Inf
IPR000398	Thymidylate synthase	4	414	1	465
IPR000573	Aconitate hydratase, C-terminal	4	415	1	472
IPR000592	Ribosomal protein S27E	4	416	3	308
IPR000652	Triosephosphate isomerase	4	417	3	310
IPR000683	Oxidoreductase, N-terminal	4	418	1	473
IPR000730	Proliferating cell nuclear antigen	4	419	2	388
IPR000738	WHEP-TRS domain	4	420	2	389
IPR000740	GrpE protein	4	421	5	235
IPR000783	RNA polymerase H/23 kD subunit	4	422	3	313
IPR000923	Type-1 copper (blue) domain	4	423	1	481
IPR001052	Rubredoxin	4	424	3	318
IPR001374	R3H domain	4	425	1	492
IPR001460	Penicillin binding protein transpeptidase domain	4	426	0	Inf
IPR001640	Prolipoprotein diacylglyceryl transferase	4	427	1	497
IPR001655	Neutrophil cytosol factor 1	4	428	4	272
IPR001684	Ribosomal protein L27	4	429	2	400
IPR001725	RNA polymerases K/14 to 18 Kd subunits	4	430	2	401
IPR001741	Glucokinase regulatory protein	4	431	0	Inf
IPR001829	Gram-negative pili assembly chaperone	4	432	0	Inf
IPR001886	Laminin N-terminal (Domain VI)	4	433	1	504
IPR001949	Respiratory-chain NADH dehydrogenase 51 Kd subunit	4	434	2	404
IPR002192	Pyruvate phosphate dikinase, PEP/pyruvate binding domain	4	435	4	278
IPR002350	Kazal-type serine protease inhibitor domain	4	436	1	515
IPR002500	Phosphoadenosine phosphosulfate reductase	4	437	0	Inf
IPR002501	Pseudouridylate synthase, TruB family, N-terminus	4	438	3	337
IPR002909	IPT/TIG domain	4	439	3	341
IPR002932	Ferredoxin-dependent glutamate synthase	4	440	1	527
IPR003097	FAD-binding domain	4	441	3	344
IPR003135	ATP-grasp domain	4	442	2	418
IPR003141	PHP domain N-terminal region	4	443	1	533
IPR003148	KTN NAD-binding domain	4	444	2	419
IPR003152	FATC domain	4	445	2	420
IPR003156	DHHA1 domain	4	446	3	346
IPR003307	eIF4-gamma/eIF5/eIF2-epsilon	4	447	3	348
IPR003364	Seryl-tRNA synthetase N-terminal domain	4	448	4	288
IPR003511	HORMA domain	4	449	1	537
IPR003648	Splicing factor motif	4	450	2	430
IPR004010	Cache domain	4	451	0	Inf
IPR004104	Oxidoreductase, C-terminal	4	452	1	559
IPR004342	EXS C-terminus	4	453	3	362
IPR004462	Desulfoferrodoxin FeS4 iron-binding domain	4	454	2	452
IPR000001	Kringle	3	455	0	Inf
IPR000054	Ribosomal protein L31e	3	456	0	Inf
IPR000089	Biotin / Lipoyl attachment	3	457	0	Inf
IPR000119	Bacterial histone-like DNA-binding protein	3	458	0	Inf
IPR000156	RanBP1 domain	3	459	2	366
IPR000268	RNA polymerases N/8 Kd subunits	3	460	2	373
IPR000281	Helix-turn-helix domain, RpiR family	3	461	0	Inf
IPR000305	UvrC homology region 1	3	462	2	375
IPR000307	Ribosomal protein S16	3	463	2	376
IPR000396	cAMP phosphodiesterases class-II	3	464	1	464
IPR000421	Coagulation factor 5/8 type C domain (FA58C)	3	465	2	382
IPR000540	Flagellar motor protein MotA	3	466	0	Inf
IPR000758	Virulence-related outer membrane protein	3	467	0	Inf
IPR000781	Enhancer of rudimentary	3	468	1	478
IPR000814	Transcription factor TFIID	3	469	3	314
IPR000830	Peripherin/rom-1 family	3	470	2	392
IPR000909	Phosphatidylinositol-specific phospholipase C, X domain	3	471	1	480
IPR001040	Eukaryotic translation initiation factor 4E (eIF-4E)	3	472	3	317
IPR001119	S-layer protein (SLH domain)	3	473	1	485
IPR001120	Prokaryotic N-terminal methylation site	3	474	0	Inf
IPR001194	DENN (AEX-3) domain	3	475	2	396
IPR001290	Poly(ADP-ribose) polymerase, catalytic region	3	476	0	Inf
IPR001309	ICE-like protease (caspase) p20 domain	3	477	4	269
IPR001607	Zn-finger in ubiquitin-hydrolases and other proteins	3	478	3	322
IPR001648	Ribosomal protein S18	3	479	0	Inf
IPR001653	Diaminopimelate epimerase	3	480	0	Inf
IPR001796	Dihydrofolate reductase	3	481	0	Inf
IPR001919	Cellulose-binding domain, bacterial type	3	482	1	505
IPR001989	Radical activating enzymes	3	483	1	508
IPR002073	3'5'-cyclic nucleotide phosphodiesterase	3	484	1	510
IPR002126	Cadherin domain	3	485	0	Inf
IPR002288	DNA gyrase, subunit B C-terminus	3	486	1	514
IPR002477	Putative peptidoglycan binding domain 1	3	487	1	518
IPR002539	MaoC-like dehydratase domain	3	488	1	520
IPR002652	Importin beta binding domain	3	489	2	410
IPR002863	DNA mismatch repair protein MutS family, N-terminal domain	3	490	1	525
IPR003014	PAN domain	3	491	2	414
IPR003033	SCP-2 sterol transfer domain	3	492	0	Inf
IPR003093	Apoptosis regulator protein, Bcl-2 family BH4 domain	3	493	0	Inf
IPR003126	Putative zinc finger in N-recognin	3	494	1	531
IPR003128	Villin headpiece domain	3	495	2	417
IPR003308	Integrase zinc-binding domain	3	496	0	Inf
IPR003338	Amino-terminal subdomain, VAT-Nn	3	497	3	349
IPR003352	Phosphotransferase system, EIIC	3	498	1	536
IPR003581	Tail specific protease	3	499	1	538
IPR003595	Protein tyrosine phosphatase, catalytic domain	3	500	2	425
IPR003601	DNA topoisomerase I ATP-binding domain	3	501	1	540
IPR003645	Follistatin-like N-terminal domain	3	502	3	352
IPR003769	DUF174	3	503	1	546
IPR003774	DUF179	3	504	1	547
IPR003823	CP12	3	505	2	435
IPR003829	DUF209	3	506	0	Inf
IPR003888	FY-rich domain N-terminus	3	507	2	436
IPR003893	Iroquois-class homeodomain protein motif	3	508	3	357
IPR003954	RNA recognition_1	3	509	1	552
IPR004003	NAD(P) transhydrogenase beta subunit	3	510	0	Inf
IPR004017	Domain of unknown function DUF224	3	511	0	Inf
IPR004035	Endonuclease III, FCL	3	512	0	Inf
IPR004100	ATP synthase alpha and beta subunit, N-terminal	3	513	2	441
IPR004101	Cytoplasmic peptidoglycan synthetases, C-terminal	3	514	1	558
IPR004106	Prolyl oligopeptidase, N-terminal beta-propeller domain	3	515	3	358
IPR004107	Phage integrase N-terminal SAM-like domain	3	516	0	Inf
IPR004112	Fumarate reductase/succinate dehydrogenase flavoprotein, C-terminal	3	517	2	442
IPR004149	NAD-dependent DNA ligase C4 zinc finger domain	3	518	0	Inf
IPR004181	MIZ zinc finger	3	519	3	360
IPR004362	Methylglyoxal synthase-like domain	3	520	2	451
IPR000077	Ribosomal protein L39e	2	521	0	Inf
IPR000098	Interleukin-10 family	2	522	0	Inf
IPR000100	Bacterial ribonuclease P protein	2	523	2	364
IPR000191	Formamidopyrimidine-DNA glycolase	2	524	2	367
IPR000271	Ribosomal protein L34	2	525	0	Inf
IPR000289	Ribosomal protein S28e	2	526	1	460
IPR000299	Band 4.1 family	2	527	3	305
IPR000327	'POU' domain	2	528	1	463
IPR000389	Small hydrophilic plant seed protein	2	529	2	379
IPR000392	NifH/frxC family	2	530	2	380
IPR000489	Dihydropteroate synthase	2	531	1	469
IPR000550	7,8-Dihydro-6-hydroxymethylpterin-pyrophosphokinase	2	532	1	471
IPR000591	Pleckstrin putative G-protein interacting domain	2	533	2	385
IPR000627	Intradiol ring-cleavage dioxygenase	2	534	0	Inf
IPR000675	Cutinase	2	535	0	Inf
IPR000691	Streptomyces subtilisin-type inhibitor	2	536	0	Inf
IPR000713	Cytoplasmic peptidoglycan synthetases, N-terminal	2	537	1	475
IPR000737	Serine protease inhibitor, squash family	2	538	1	477
IPR000754	Ribosomal protein S9	2	539	3	311
IPR000779	Interleukin-2	2	540	2	390
IPR000791	GPR1/FUN34/yaaH family	2	541	0	Inf
IPR000938	CAP-Gly domain	2	542	2	393
IPR000967	Zinc finger NF-X1 type	2	543	2	394
IPR000980	Src homology 2 (SH2) domain	2	544	1	483
IPR000998	MAM domain	2	545	1	484
IPR001031	Thioesterase	2	546	0	Inf
IPR001121	Gamma-adaptin, C-terminus	2	547	1	486
IPR001127	Sugar-specific permease, EIIA 1 domain	2	548	0	Inf
IPR001227	Acyl transferase domain	2	549	1	488
IPR001303	Class II Aldolase and Adducin N-terminal domain	2	550	1	489
IPR001378	Uncharacterized protein family UPF0066 (VIRR)	2	551	1	493
IPR001462	Hepadnaviral P protein C-terminal domain	2	552	0	Inf
IPR001523	'Paired box' domain	2	553	1	495
IPR001637	Glutamine synthetase class-I adenylation site	2	554	0	Inf
IPR001662	Elongation factor 1 gamma chain	2	555	4	273
IPR001674	GMP synthase C terminal domain	2	556	1	498
IPR001698	F-actin capping protein beta subunit	2	557	1	499
IPR001706	Ribosomal protein L35	2	558	1	500
IPR001707	Chloramphenicol acetyltransferase	2	559	0	Inf
IPR001721	C-terminal domain of threonine dehydratase	2	560	0	Inf
IPR001792	Acylphosphatase	2	561	0	Inf
IPR001827	'Homeobox' antennapedia-type protein	2	562	1	502
IPR001928	Endothelin and related toxins	2	563	0	Inf
IPR001942	Neuromedin U	2	564	0	Inf
IPR001960	WH1 domain	2	565	1	506
IPR001996	PTS (phosphotransferase system) EIIB domain	2	566	0	Inf
IPR002026	Urease gamma subunit	2	567	1	509
IPR002221	WAP-type (Whey Acidic Protein) four-disulfide core domain	2	568	1	513
IPR002223	Pancreatic trypsin inhibitor (Kunitz)	2	569	0	Inf
IPR002420	Phosphoinositide 3-kinase C2 domain	2	570	0	Inf
IPR002483	PWI domain	2	571	1	519
IPR002570	Hpt domain	2	572	0	Inf
IPR002713	FF domain	2	573	2	411
IPR002719	Retinoblastoma-associated protein B domain	2	574	1	521
IPR002720	Retinoblastoma-associated protein A domain	2	575	1	522
IPR002734	RibD/ribG C-terminal domain	2	576	1	523
IPR002772	Glycoside hydrolase family 3, C terminal	2	577	1	524
IPR002871	NifU-like N terminal domain	2	578	2	412
IPR002894	HypB/UreG nucleotide-binding domain	2	579	1	526
IPR002908	Frataxin-like domain	2	580	0	Inf
IPR002938	Monooxygenases FAD binding domain	2	581	1	529
IPR002993	Ornithine decarboxylase antizyme	2	582	3	342
IPR003123	Vacuolar sorting protein 9 (VPS9) domain	2	583	0	Inf
IPR003124	WH2 domain	2	584	2	416
IPR003151	FAT domain	2	585	0	Inf
IPR003162	Transcription factor TAFII-31	2	586	0	Inf
IPR003221	DNA directed RNA polymerase, 7 kDa subunit	2	587	0	Inf
IPR003228	Transcription initiation factor TFIID subunit	2	588	2	421
IPR003585	Putative band 4.1 homologue	2	589	1	539
IPR003608	MIR domain	2	590	2	428
IPR003610	Chitin-binding domain type 3	2	591	0	Inf
IPR003732	DUF154	2	592	1	543
IPR003746	DUF167	2	593	2	433
IPR003788	DUF185	2	594	1	549
IPR003789	DUF186	2	595	1	550
IPR003798	DUF195	2	596	0	Inf
IPR003838	DUF214	2	597	0	Inf
IPR003858	Surface exposed protein, C-terminus	2	598	0	Inf
IPR003889	FY-rich domain C-terminus	2	599	2	437
IPR004006	Dak kinase domain	2	600	0	Inf
IPR004011	GYR motif	2	601	0	Inf
IPR004015	SKIP/SNW domain	2	602	1	554
IPR004016	ERCC4 domain	2	603	2	440
IPR004098	Prp18 domain	2	604	1	557
IPR004111	Tetracyclin repressor, C-terminal	2	605	0	Inf
IPR004125	Signal peptide binding (SRP54) M-domain	2	606	2	443
IPR004163	Coenzyme A transferase 1	2	607	0	Inf
IPR004192	Ubiquinol cytochrome reductase transmembrane region	2	608	2	446
IPR004198	C5HC2 zinc finger	2	609	2	447
IPR004328	BRO1-like domain	2	610	2	449
IPR004568	Phosphopantethiene-protein transferase domain	2	611	1	567
IPR004606	Molybdenum-pterin binding domain	2	612	0	Inf
IPR004675	Alkylhydroperoxidase AhpD family core domain	2	613	0	Inf
IPR000055	Restriction modification system, type I	1	614	0	Inf
IPR000157	TIR domain	1	615	1	455
IPR000177	Apple domain	1	616	0	Inf
IPR000219	Dbl domain (dbl/cdc24 rhoGEF family)	1	617	1	458
IPR000237	GRIP domain	1	618	1	459
IPR000293	Channel forming colicins	1	619	0	Inf
IPR000320	Hedgehog amino-terminal signaling domain	1	620	1	462
IPR000334	Glycoside hydrolase family 45	1	621	0	Inf
IPR000342	Regulator of G Protein Signaling (RGS) domain	1	622	0	Inf
IPR000359	Cystine-knot domain	1	623	0	Inf
IPR000445	Helix-hairpin-helix motif	1	624	1	467
IPR000532	Glucagon / GIP / secretin / VIP family	1	625	1	470
IPR000601	PKD domain	1	626	0	Inf
IPR000773	Granulocyte-macrophage colony-stimulating factor	1	627	0	Inf
IPR000800	Notch (DSL) domain	1	628	0	Inf
IPR000857	Core domain in kinesin and myosin motors	1	629	0	Inf
IPR000867	Insulin-like growth factor-binding protein	1	630	0	Inf
IPR000949	ELM2 domain	1	631	1	482
IPR000962	Prokaryotic dksA/traR C4-type zinc finger	1	632	0	Inf
IPR001054	Guanylate cyclase	1	633	0	Inf
IPR001162	Excinuclease ABC subunit C domain 2	1	634	0	Inf
IPR001240	N-(5'phosphoribosyl)anthranilate isomerase (PRAI)	1	635	0	Inf
IPR001346	Interferon regulatory factor family	1	636	1	490
IPR001505	Cu(A) centre of cytochrome c oxidase, subunit II and nitrous oxide reductase	1	637	0	Inf
IPR001699	T-box domain	1	638	0	Inf
IPR001705	Ribosomal protein L33	1	639	0	Inf
IPR001761	Periplasmic binding proteins and sugar binding domain, LacI family	1	640	0	Inf
IPR001875	Death effector domain	1	641	0	Inf
IPR002172	Low density lipoprotein (LDL)-receptor class A (LDLRA) domain	1	642	1	511
IPR002178	phosphoenolpyruvate-dependent sugar phosphotransferase system, EIIA 2	1	643	0	Inf
IPR002474	Carbamoyl-phosphate synthase small chain	1	644	1	517
IPR002545	CheW-like domain	1	645	0	Inf
IPR002558	I/LWEQ domain	1	646	0	Inf
IPR002563	Flavin reductase-like domain	1	647	0	Inf
IPR002620	Alphavirus nonstructural protein nsP1	1	648	0	Inf
IPR002819	HD domain	1	649	0	Inf
IPR002865	LexA DNA binding domain	1	650	0	Inf
IPR002883	Cellulose-binding domain	1	651	0	Inf
IPR003114	Domain associated with PX domains	1	652	0	Inf
IPR003115	ParB-like nuclease domain	1	653	0	Inf
IPR003122	Tar ligand binding domain	1	654	0	Inf
IPR003166	TFIIE beta subunit core domain	1	655	1	534
IPR003219	Cytochrome c, alcohol dehydrogenase-like subunit	1	656	0	Inf
IPR003257	Bacterial NUSG	1	657	0	Inf
IPR003327	Myc leucine zipper	1	658	0	Inf
IPR003343	Bacterial Ig-like domain (group 2)	1	659	0	Inf
IPR003456	Domain of unknown function DUF143	1	660	2	424
IPR003599	Immunoglobulin subtype	1	661	0	Inf
IPR003605	GS motif preceding kinase domain in TGF beta receptor	1	662	0	Inf
IPR003622	Potential DAG-kinase catalytic domain	1	663	0	Inf
IPR003665	Type I restriction-modification system, M subunit	1	664	0	Inf
IPR003712	Cyanate lyase, C-terminal	1	665	1	541
IPR003727	DUF149	1	666	0	Inf
IPR003729	DUF151	1	667	1	542
IPR003742	DUF163	1	668	1	544
IPR003749	DUF170	1	669	0	Inf
IPR003750	DUF171	1	670	1	545
IPR003776	DUF181	1	671	0	Inf
IPR003790	DUF187	1	672	0	Inf
IPR003796	DUF193	1	673	0	Inf
IPR003808	UPF0050_DUF	1	674	2	434
IPR003810	DUF204	1	675	0	Inf
IPR003827	DUF207	1	676	0	Inf
IPR003828	DUF208	1	677	0	Inf
IPR003834	Cytochrome c biogenesis protein transmembrane region	1	678	0	Inf
IPR003863	Domain of unknown function DUF220	1	679	0	Inf
IPR003879	Butyrophylin C-terminal DUF	1	680	0	Inf
IPR004007	Dak phosphatase domain	1	681	1	553
IPR004013	PHP domain C-terminal region	1	682	0	Inf
IPR004027	SEC-C motif	1	683	1	556
IPR004108	Hydrogenase large subunit, C-terminal	1	684	1	560
IPR004114	THUMP domain	1	685	1	561
IPR004115	GAD domain	1	686	1	562
IPR004164	Coenzyme A transferase 2	1	687	0	Inf
IPR004170	WWE domain	1	688	1	563
IPR004177	DDHD domain	1	689	1	564
IPR004184	Pyruvate formate-lyase	1	690	0	Inf
IPR004199	Beta galactosidase small chain N terminus	1	691	0	Inf
IPR004200	Beta galactosidase small chain C terminus	1	692	0	Inf
IPR004302	Spheroidin/spindolin	1	693	0	Inf
IPR004305	TENA/THI-4 protein	1	694	2	448
IPR004457	ZPR1 zinc finger domain	1	695	1	565
IPR004495	Methionyl-tRNA synthetase C-terminal region beta subunit	1	696	0	Inf
IPR004521	Uncharacterized domain 2	1	697	1	566
IPR004646	Fe-S type hydro-lyases tartrate/fumarate alpha region	1	698	0	Inf
IPR004647	Fe-S type hydro-lyases tartrate/fumarate beta region	1	699	0	Inf
IPR001138	Fungal transcriptional regulatory protein, N-terminus	0	Inf	1	487
IPR001766	Fork head domain	0	Inf	1	501
IPR001831	HIV transactivating regulatory protein (Tat)	0	Inf	1	503
IPR002181	Fibrinogen beta and gamma chains C-terminal globular domain	0	Inf	1	512
IPR003101	KIX domain	0	Inf	1	530
IPR004635	Signal peptide peptidase SppA 36K type	0	Inf	1	568
