# Supplementary figures and images for: The Genomes of Oryza sativa: A History of Duplications
Source: PLOS journal article supplement (doi:10.1371/journal.pbio.0030038), 2005-01-21

Chr09

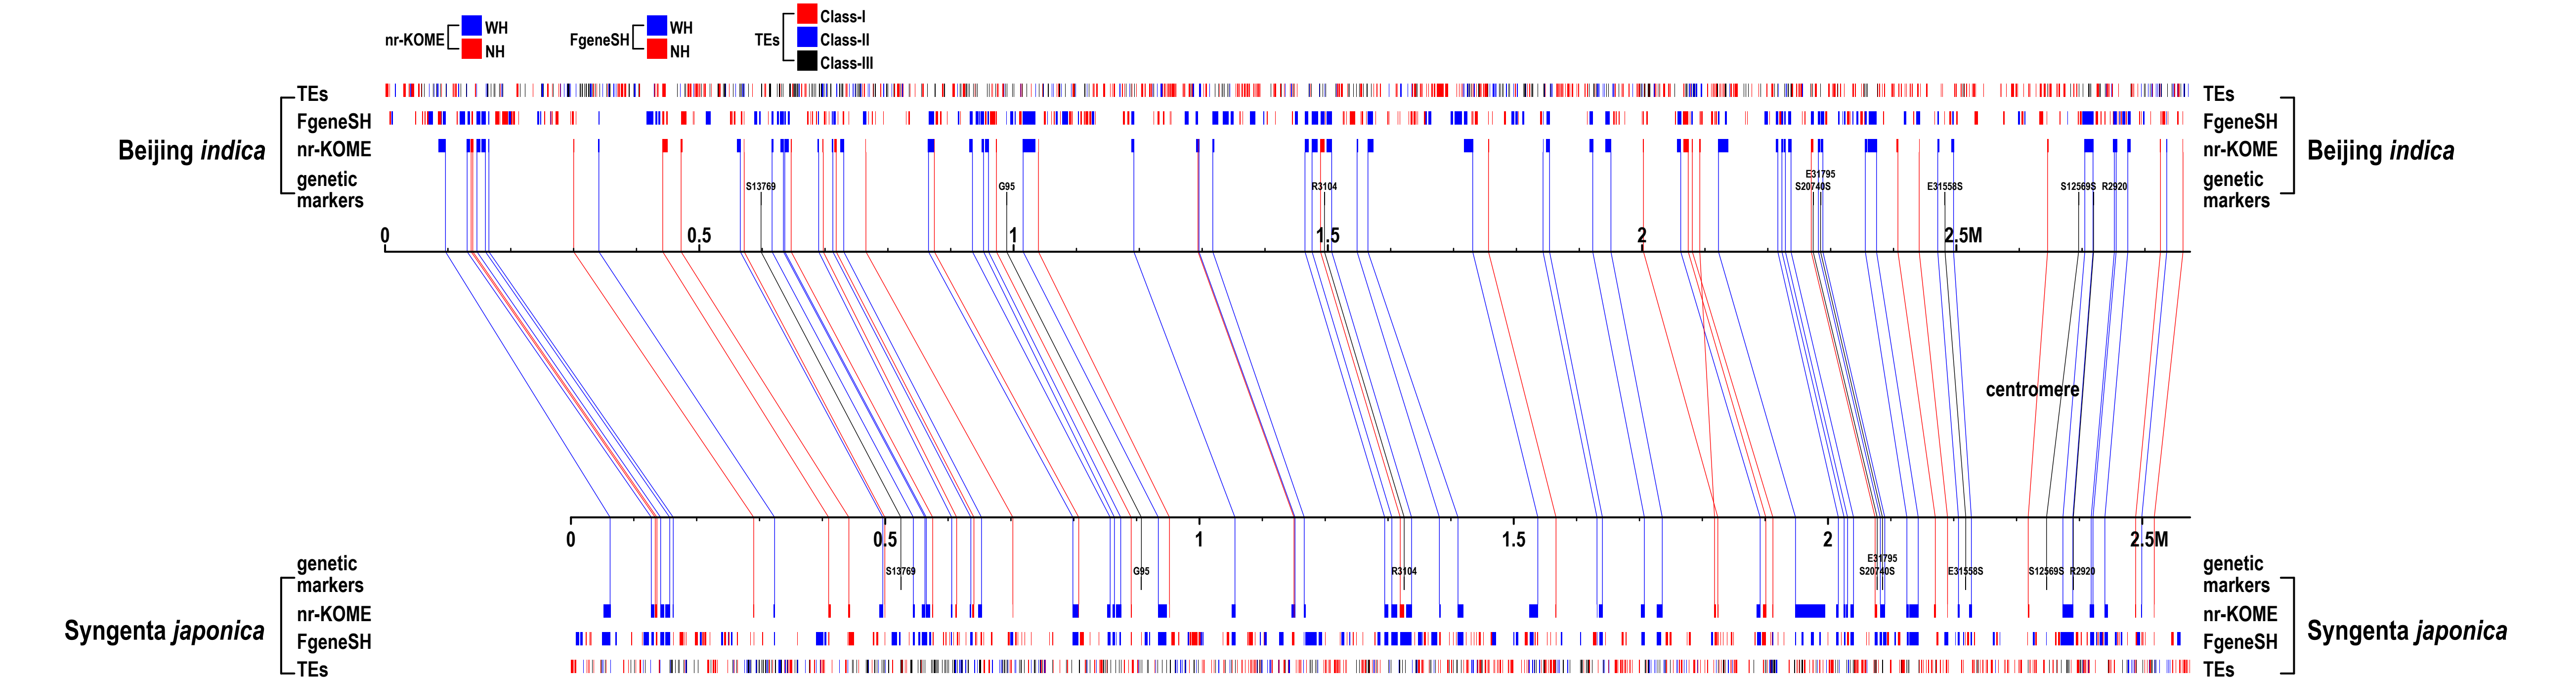

Supplement: S6 (10.1371/journal.pbio.0030038.s006) [file redirect.do]

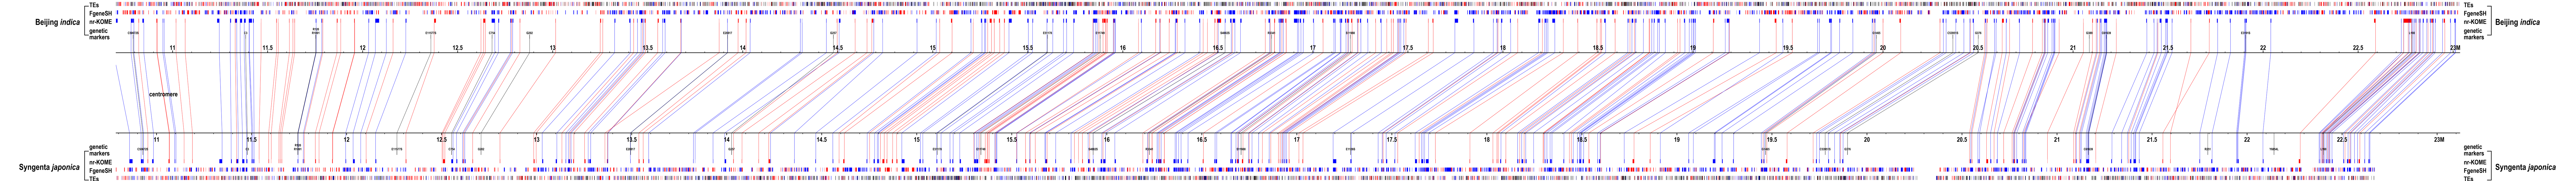

Supplement: S6 (10.1371/journal.pbio.0030038.s006) [file redirect.do]

Chr04

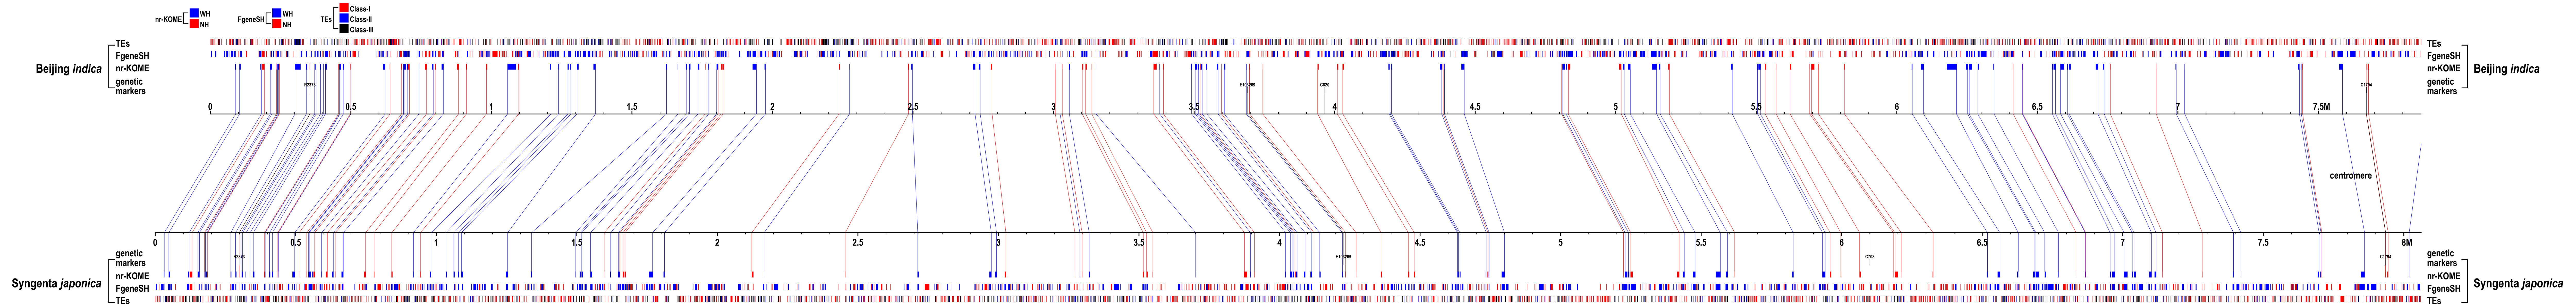

Supplement: S6 (10.1371/journal.pbio.0030038.s006) [file redirect.do]

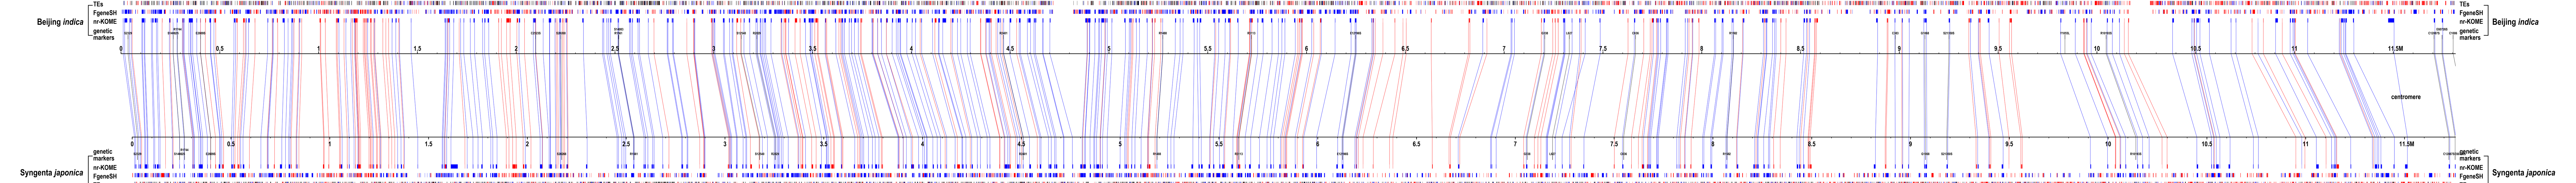

Supplement: S6 (10.1371/journal.pbio.0030038.s006) [file redirect.do]

Chr10

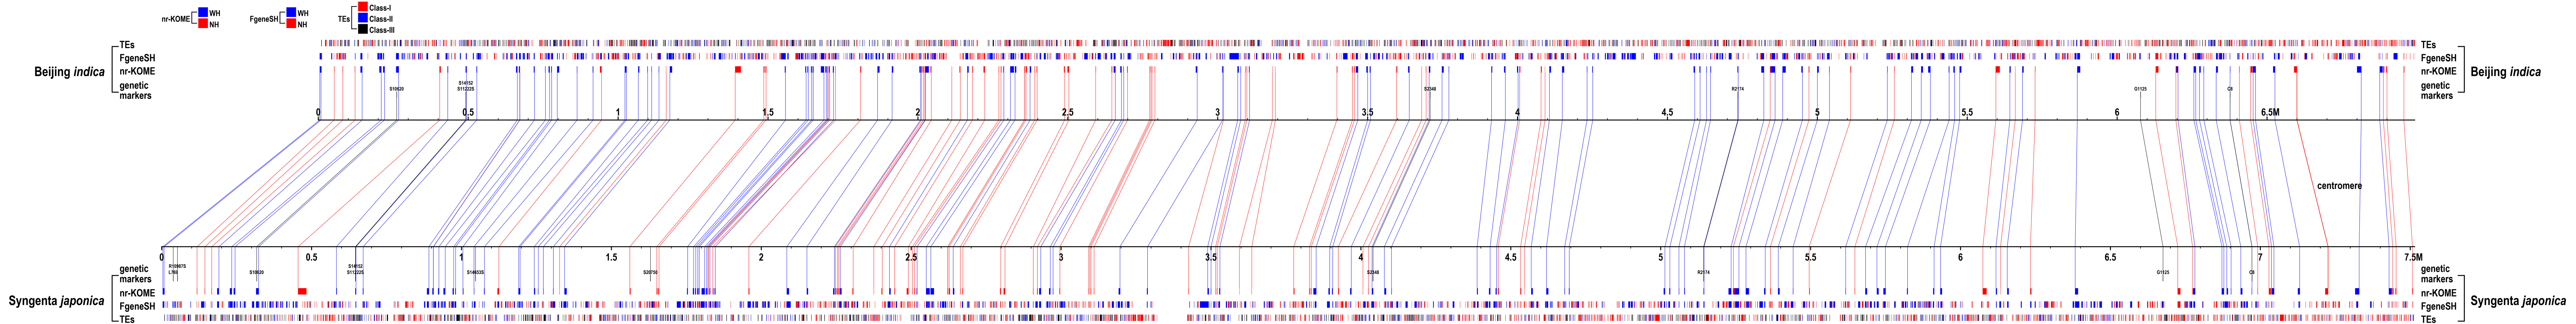

Supplement: S6 (10.1371/journal.pbio.0030038.s006) [file redirect.do]

## Chr11

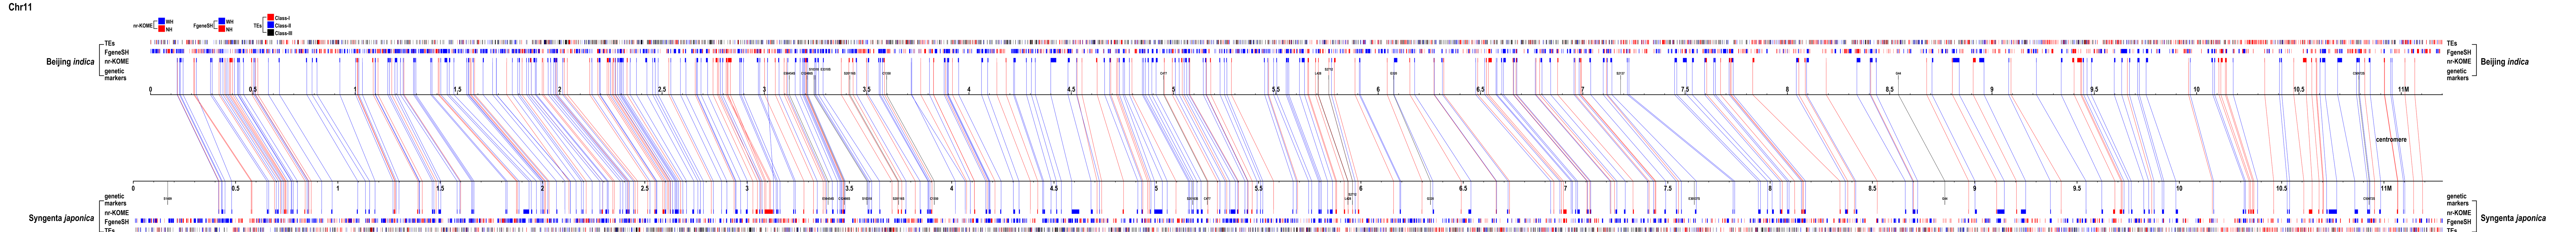

Supplement: S6 (10.1371/journal.pbio.0030038.s006) [file redirect.do]

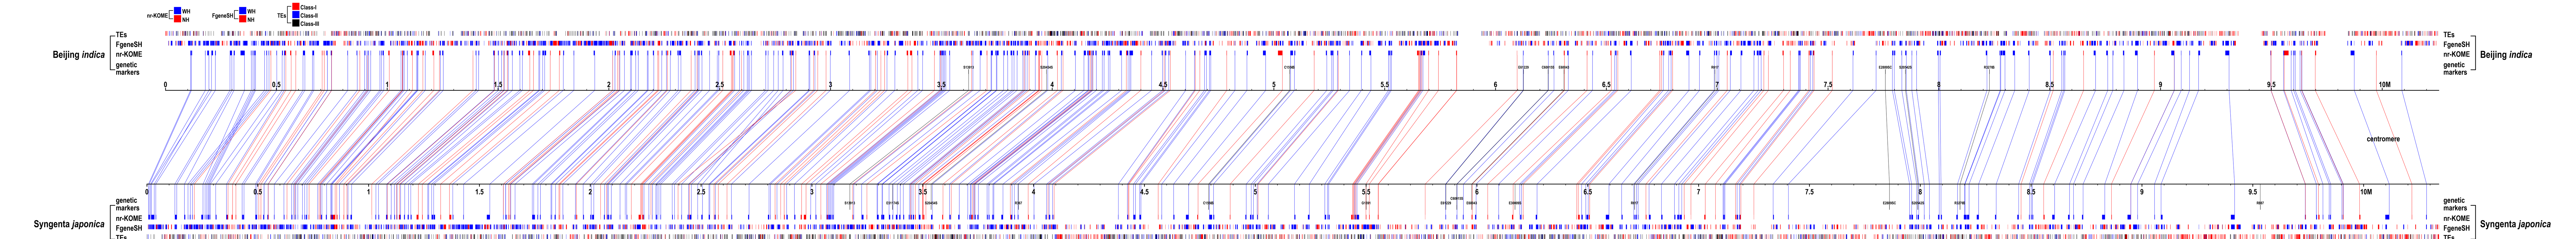

Supplement: S6 (10.1371/journal.pbio.0030038.s006) [file redirect.do]

# Maize-Rice Comparison

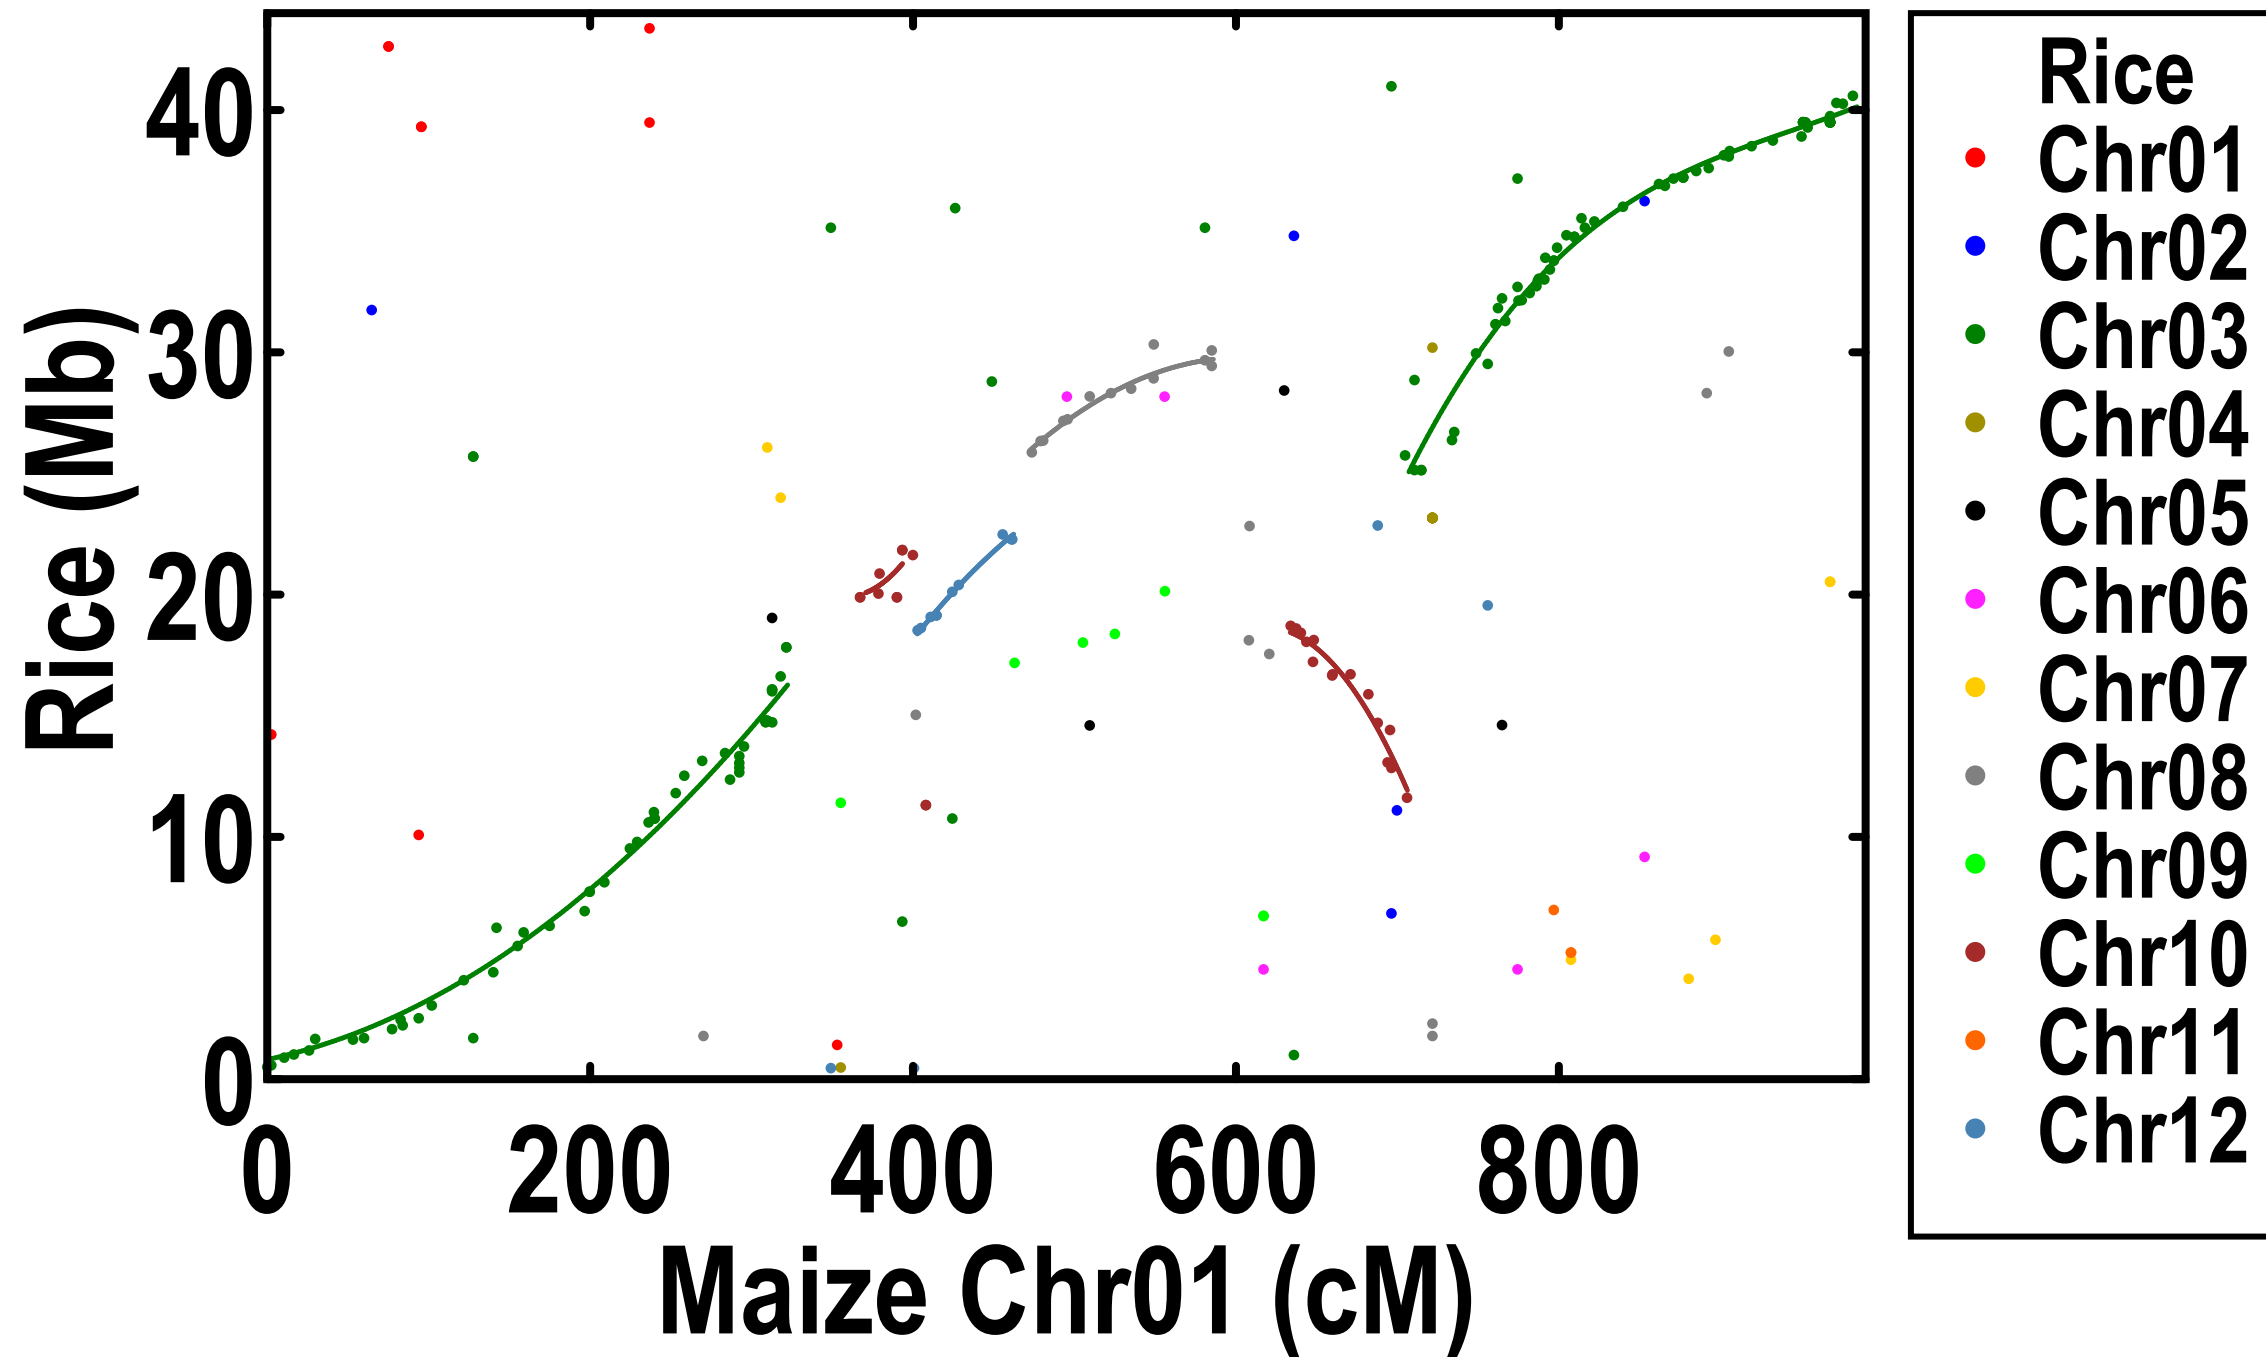

Supplement: S9 (10.1371/journal.pbio.0030038.s009) [file redirect.do]

# Maize-Rice Comparison

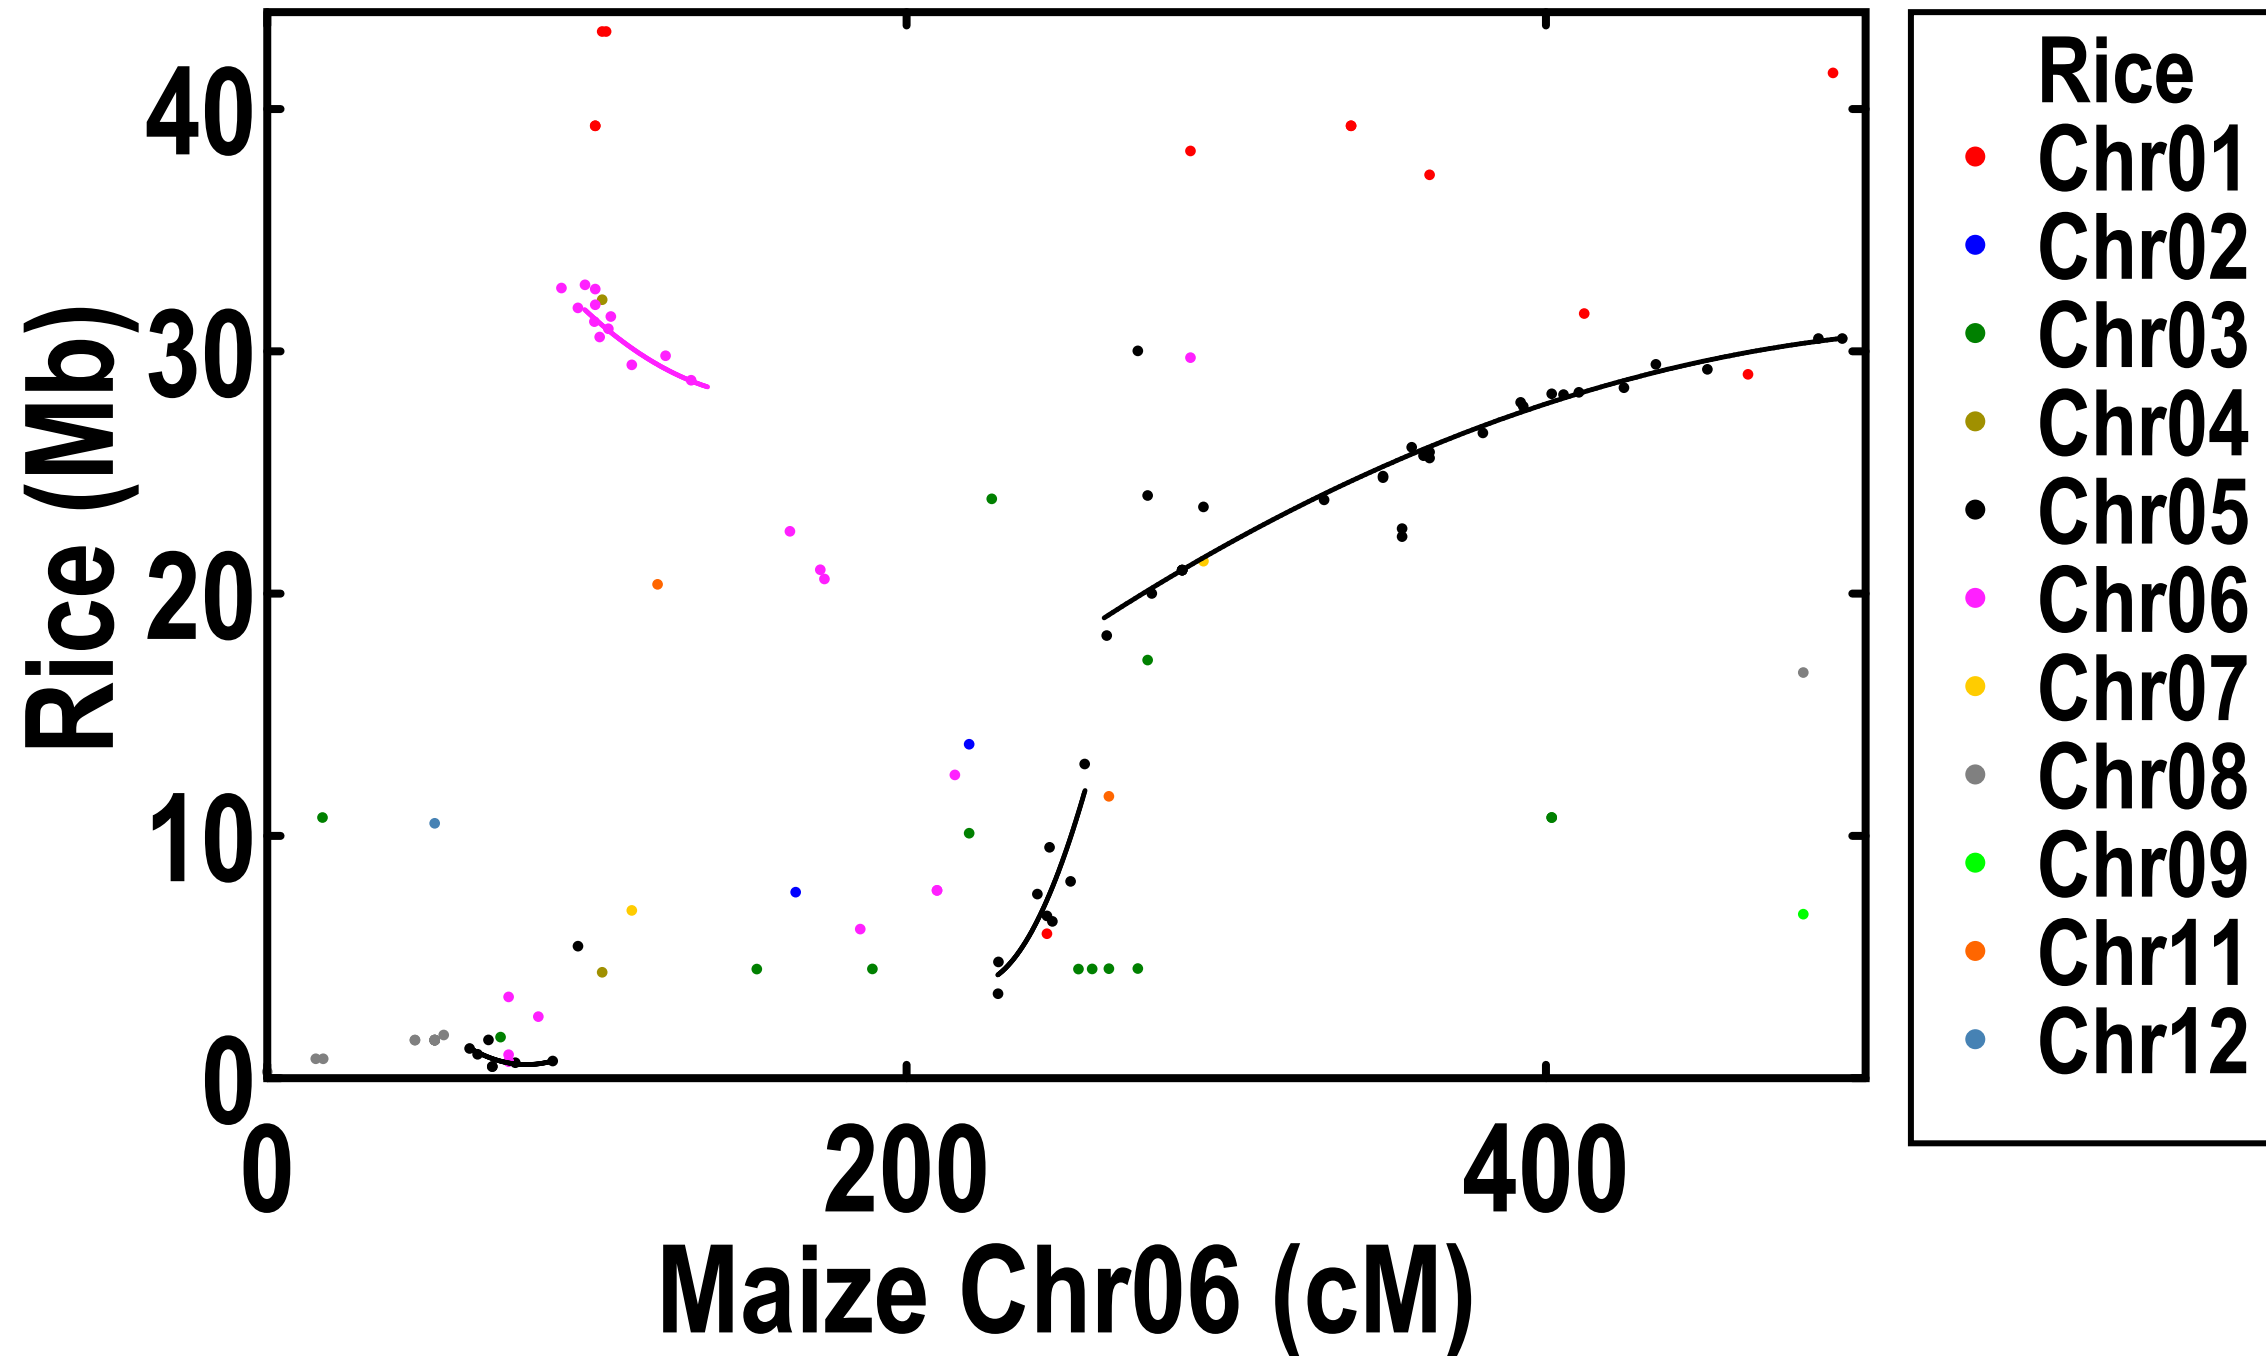

Supplement: S9 (10.1371/journal.pbio.0030038.s009) [file redirect.do]

# Maize-Rice Comparison

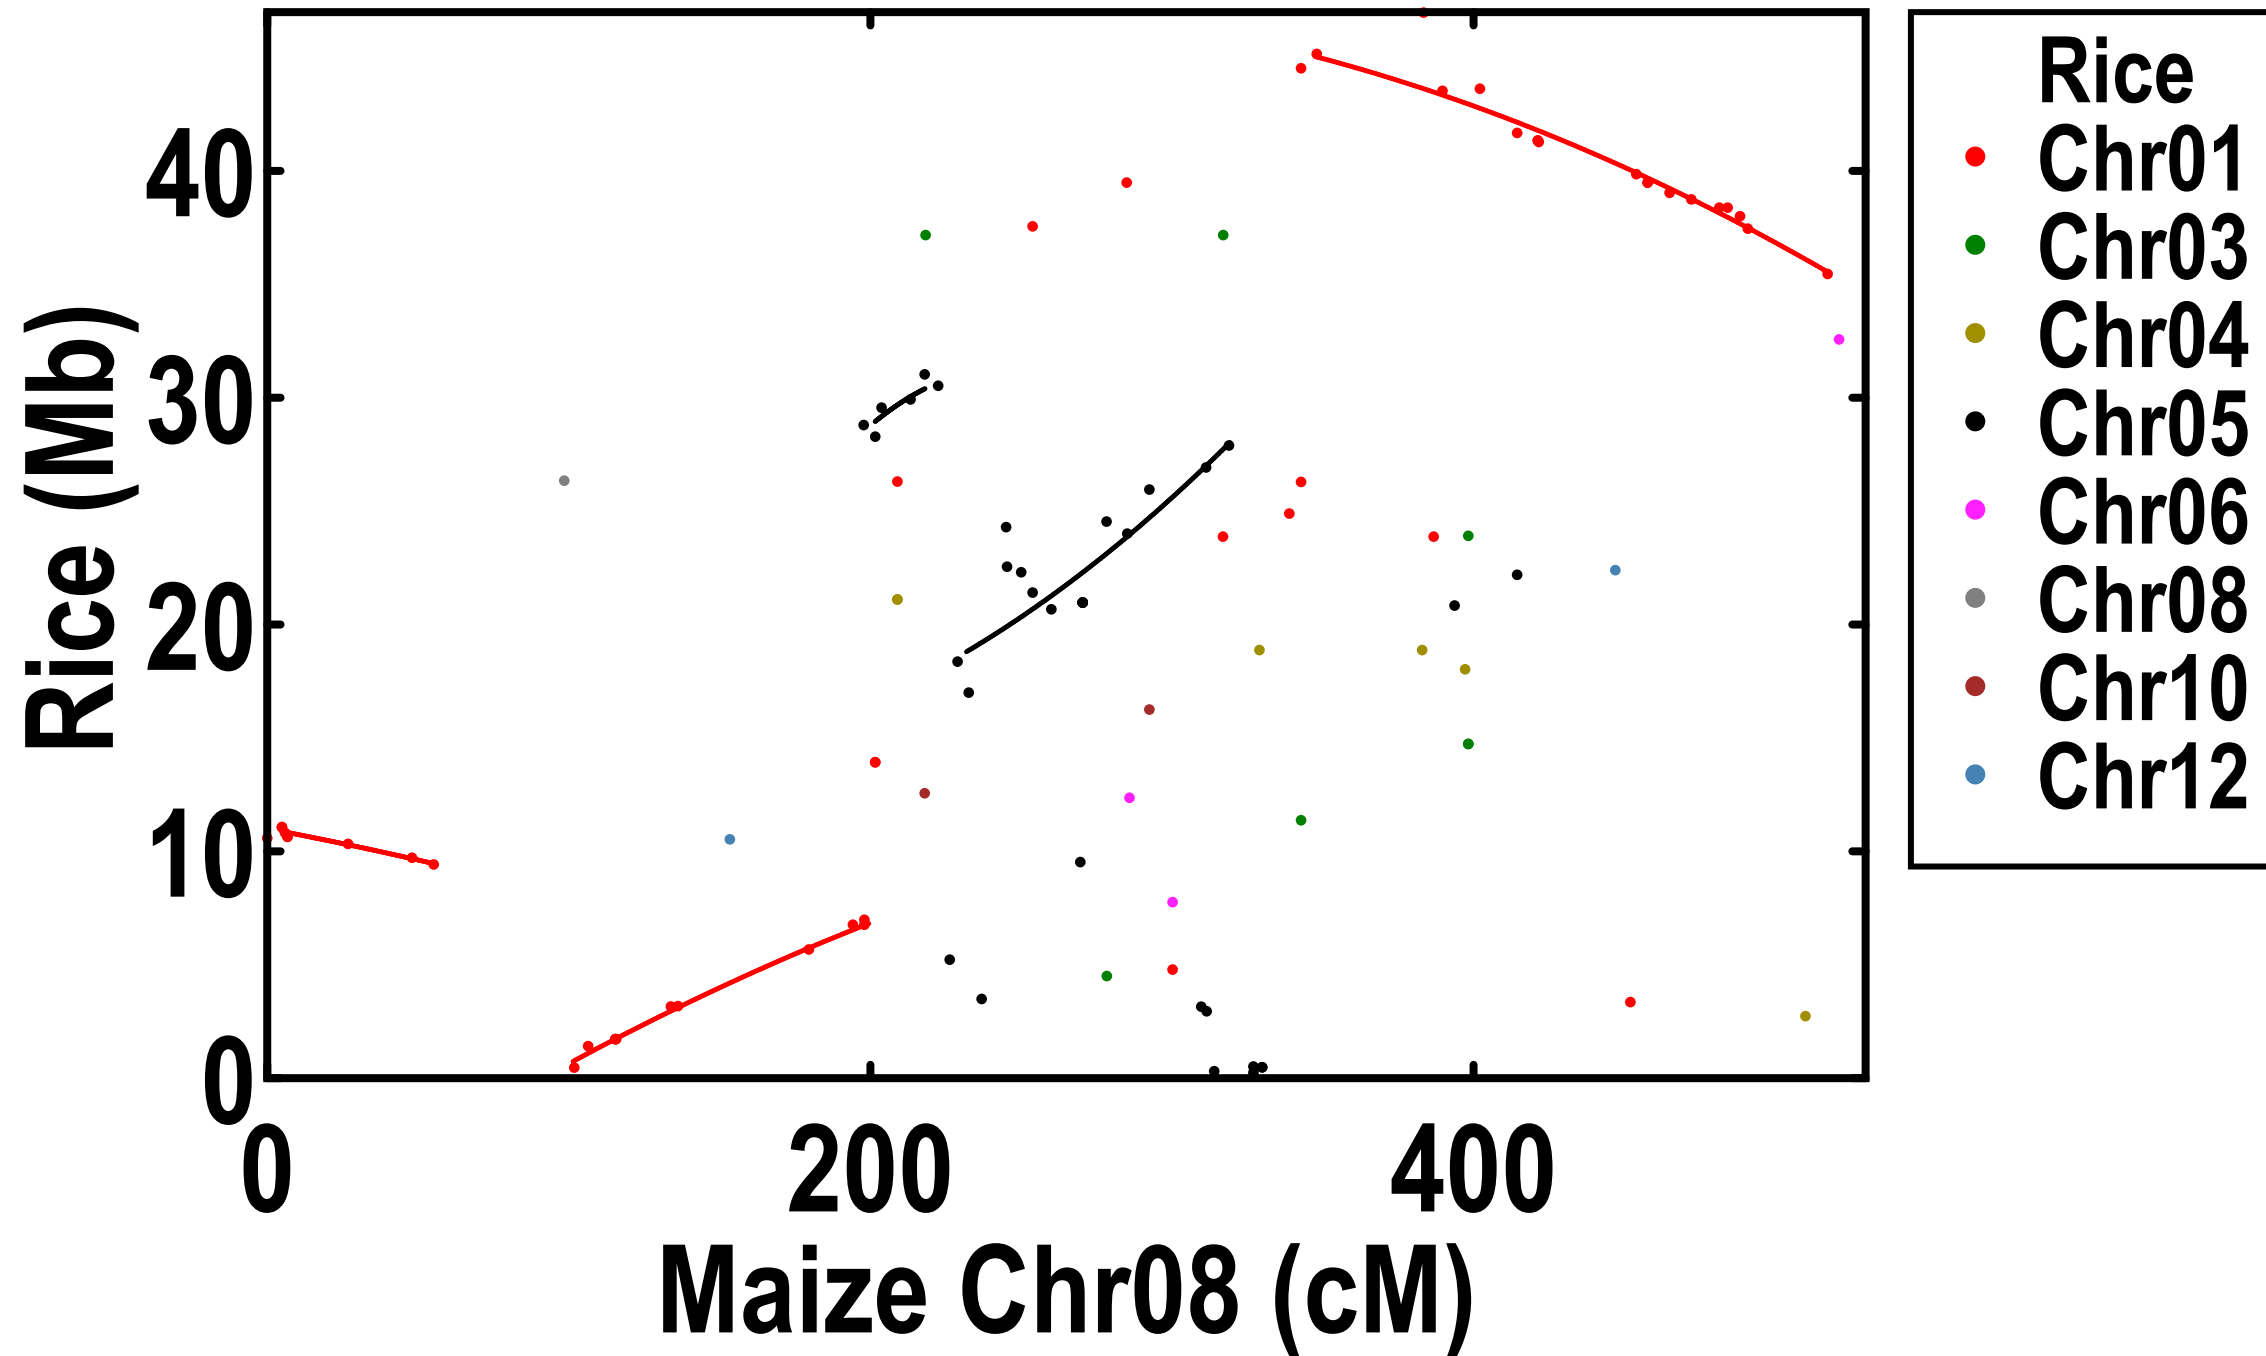

Supplement: S9 (10.1371/journal.pbio.0030038.s009) [file redirect.do]

# Maize-Rice Comparison

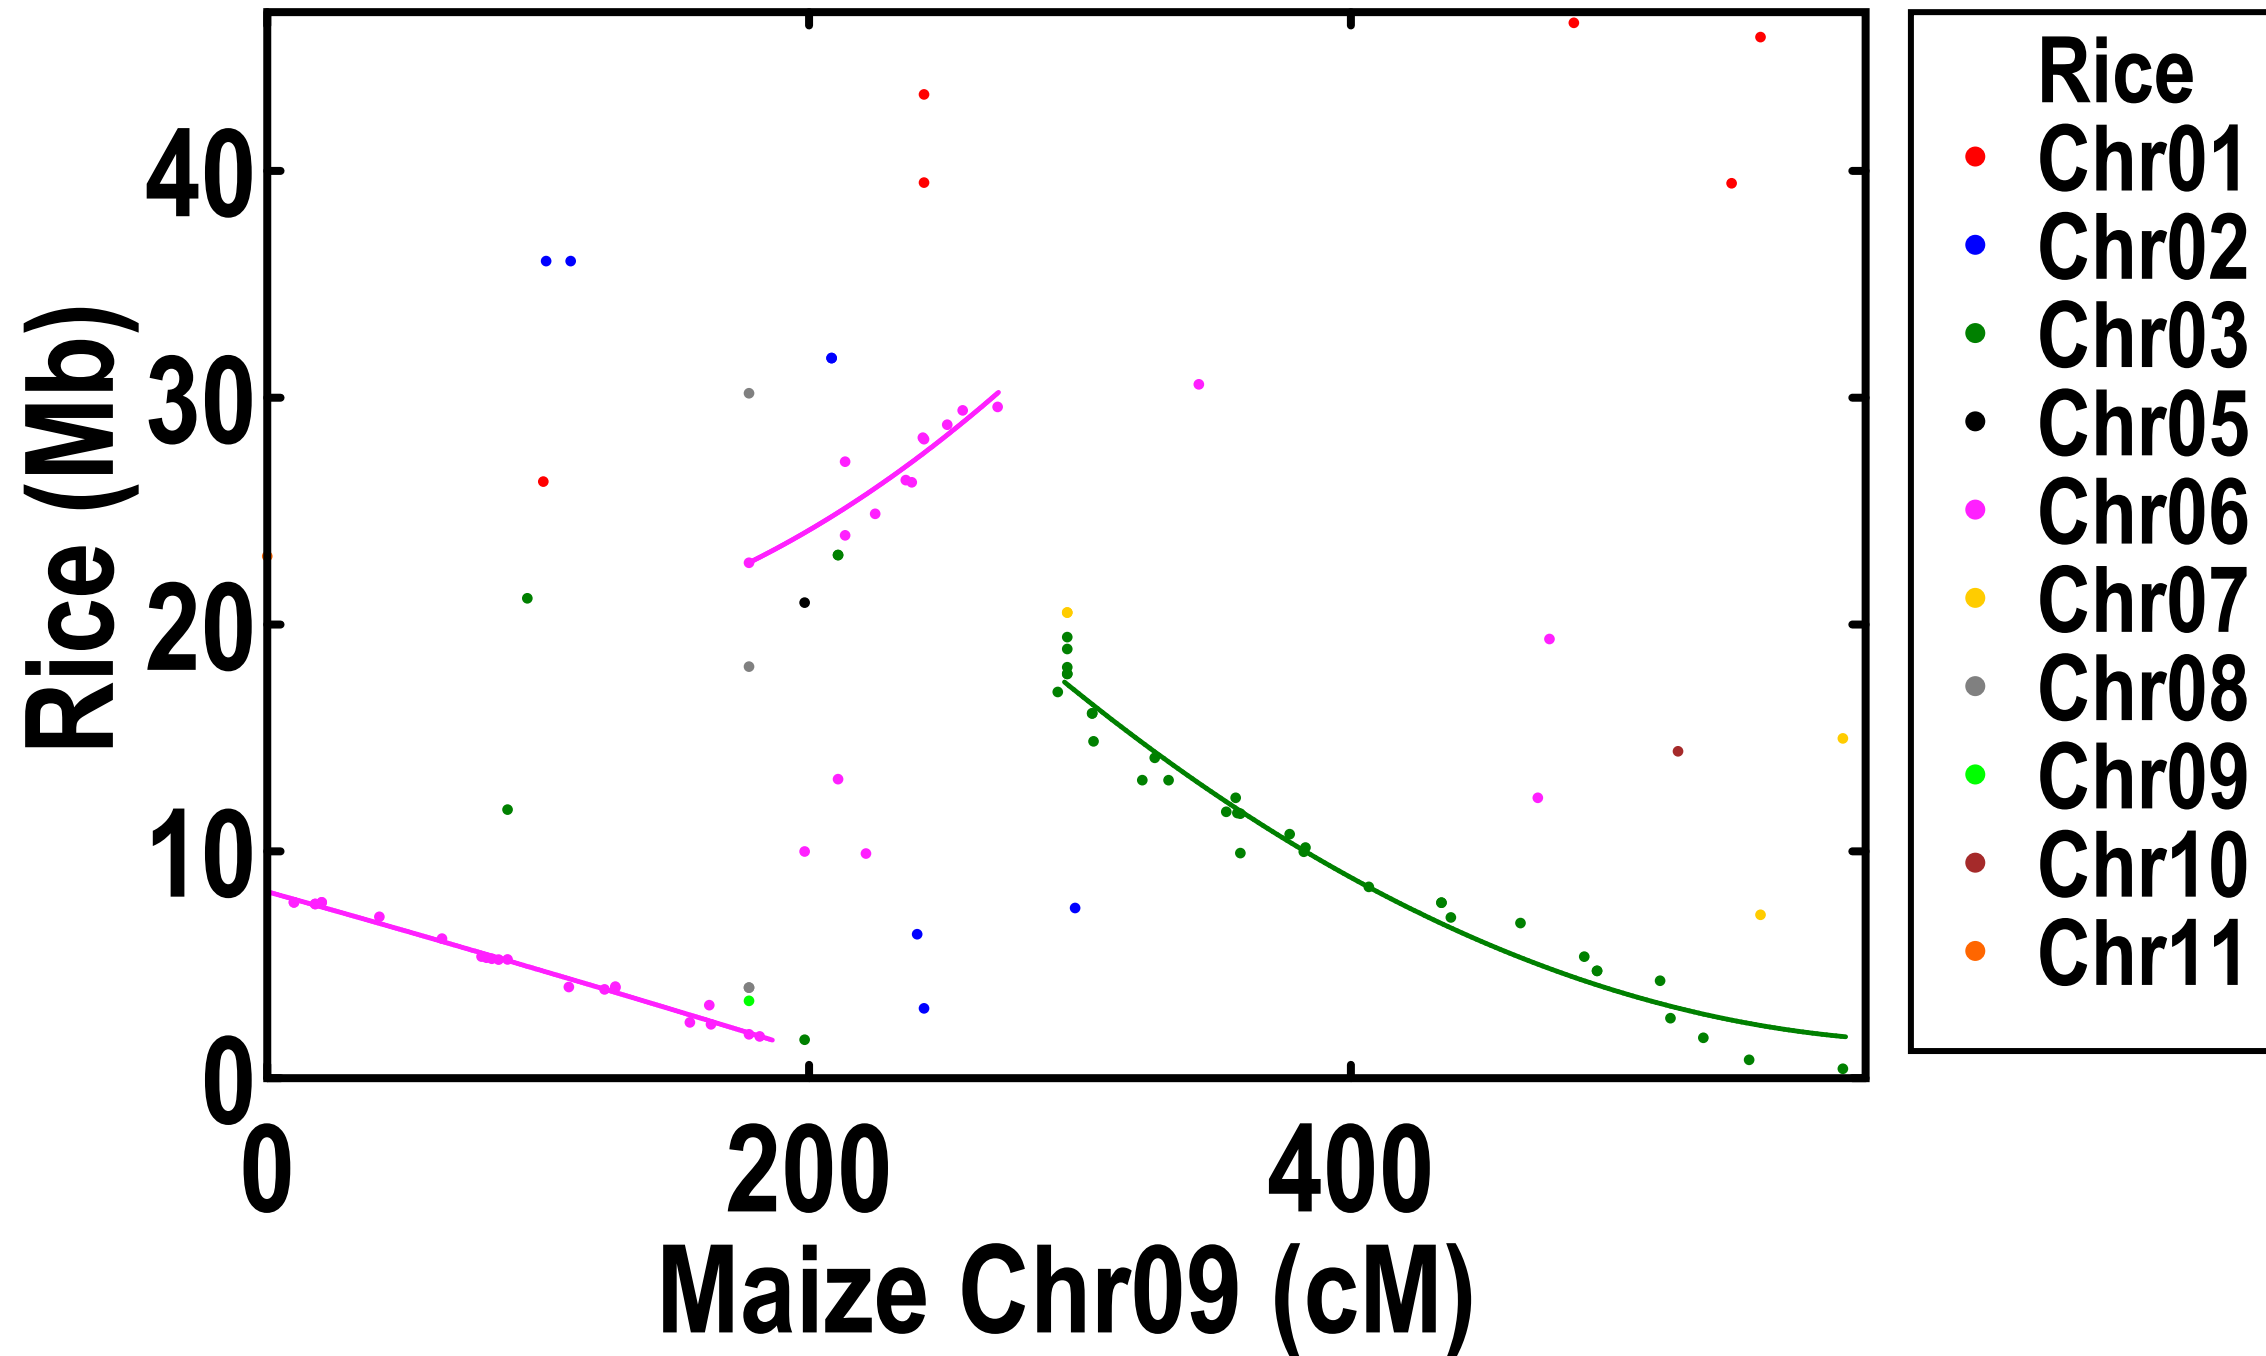

Supplement: S9 (10.1371/journal.pbio.0030038.s009) [file redirect.do]

# Maize-Rice Comparison

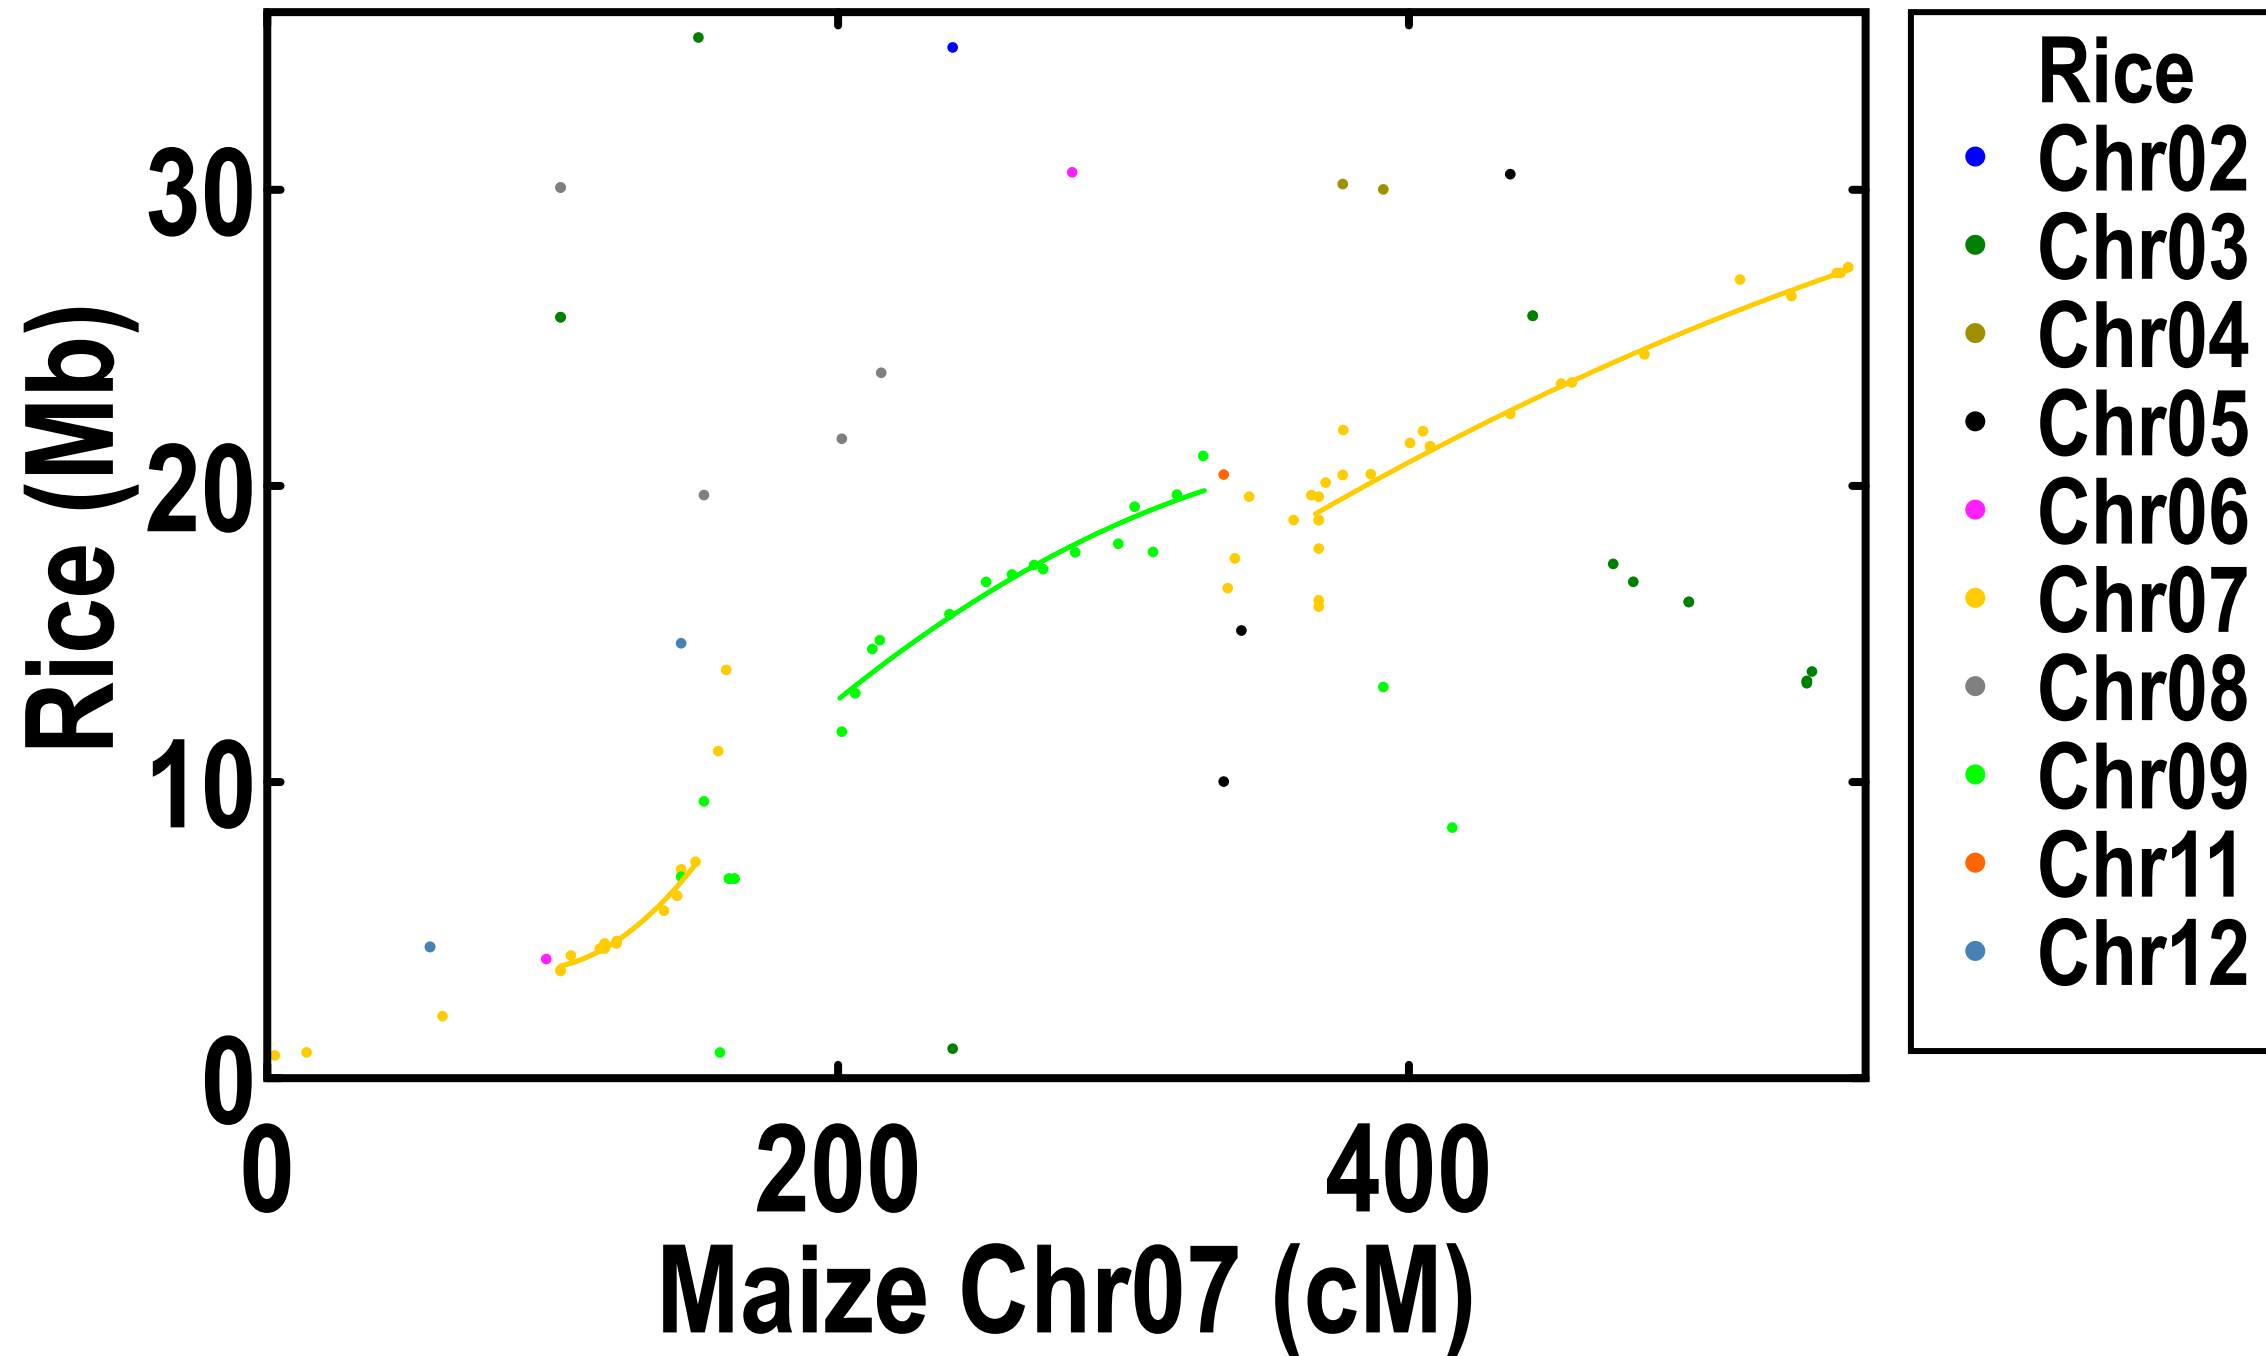

Supplement: S9 (10.1371/journal.pbio.0030038.s009) [file redirect.do]

# Maize-Rice Comparison

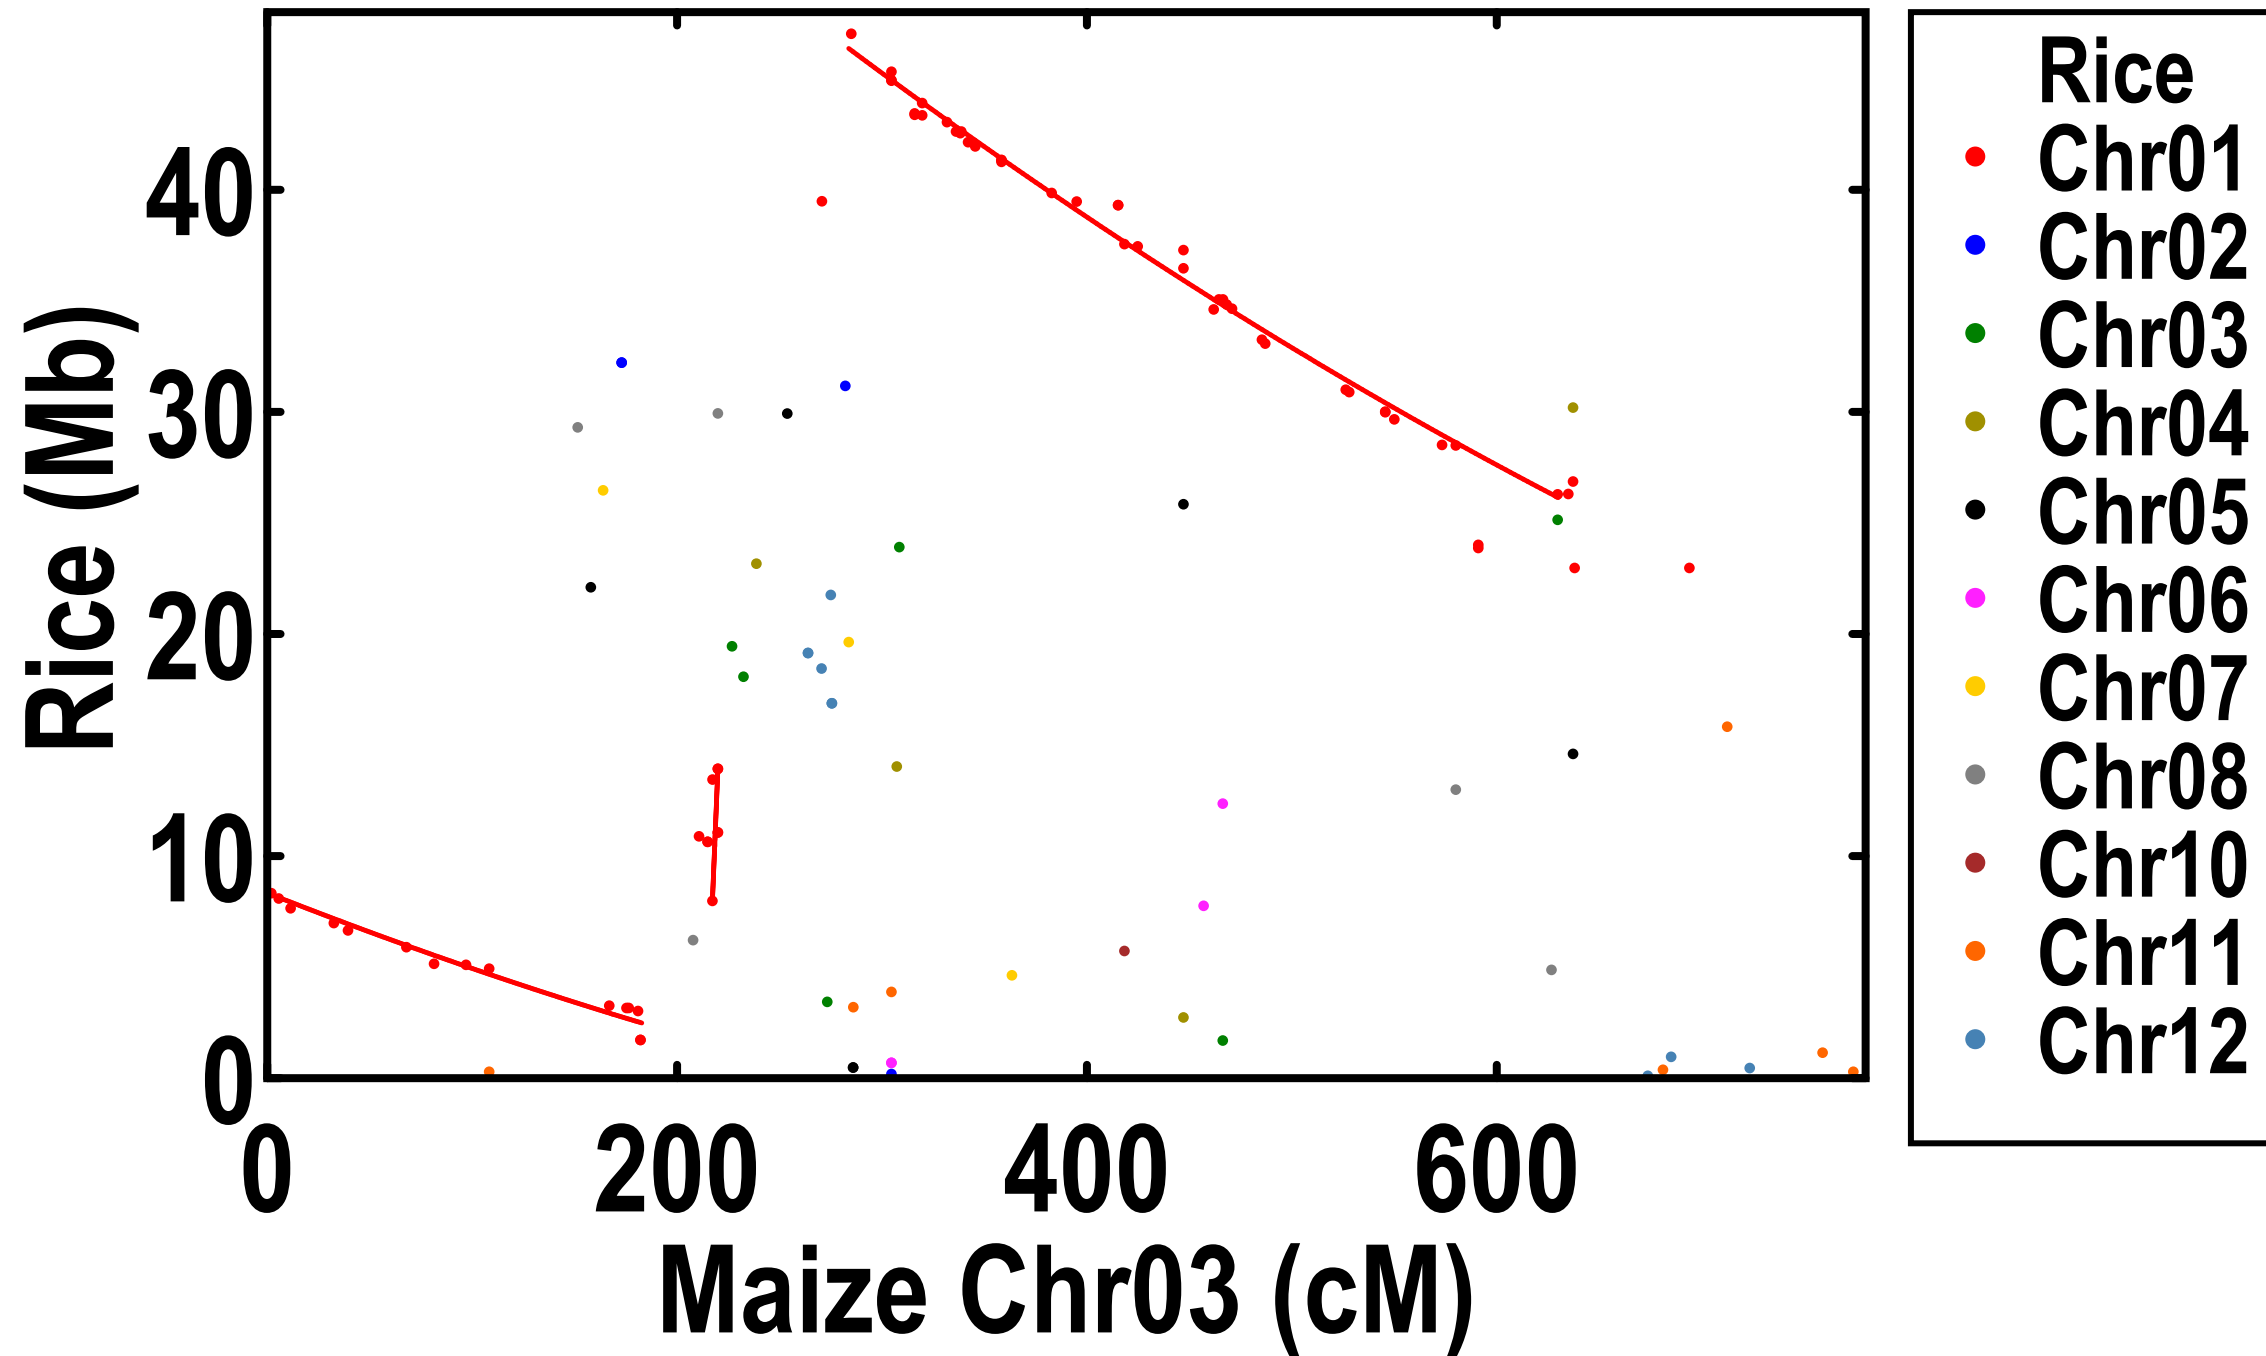

Supplement: S9 (10.1371/journal.pbio.0030038.s009) [file redirect.do]

# Maize-Rice Comparison

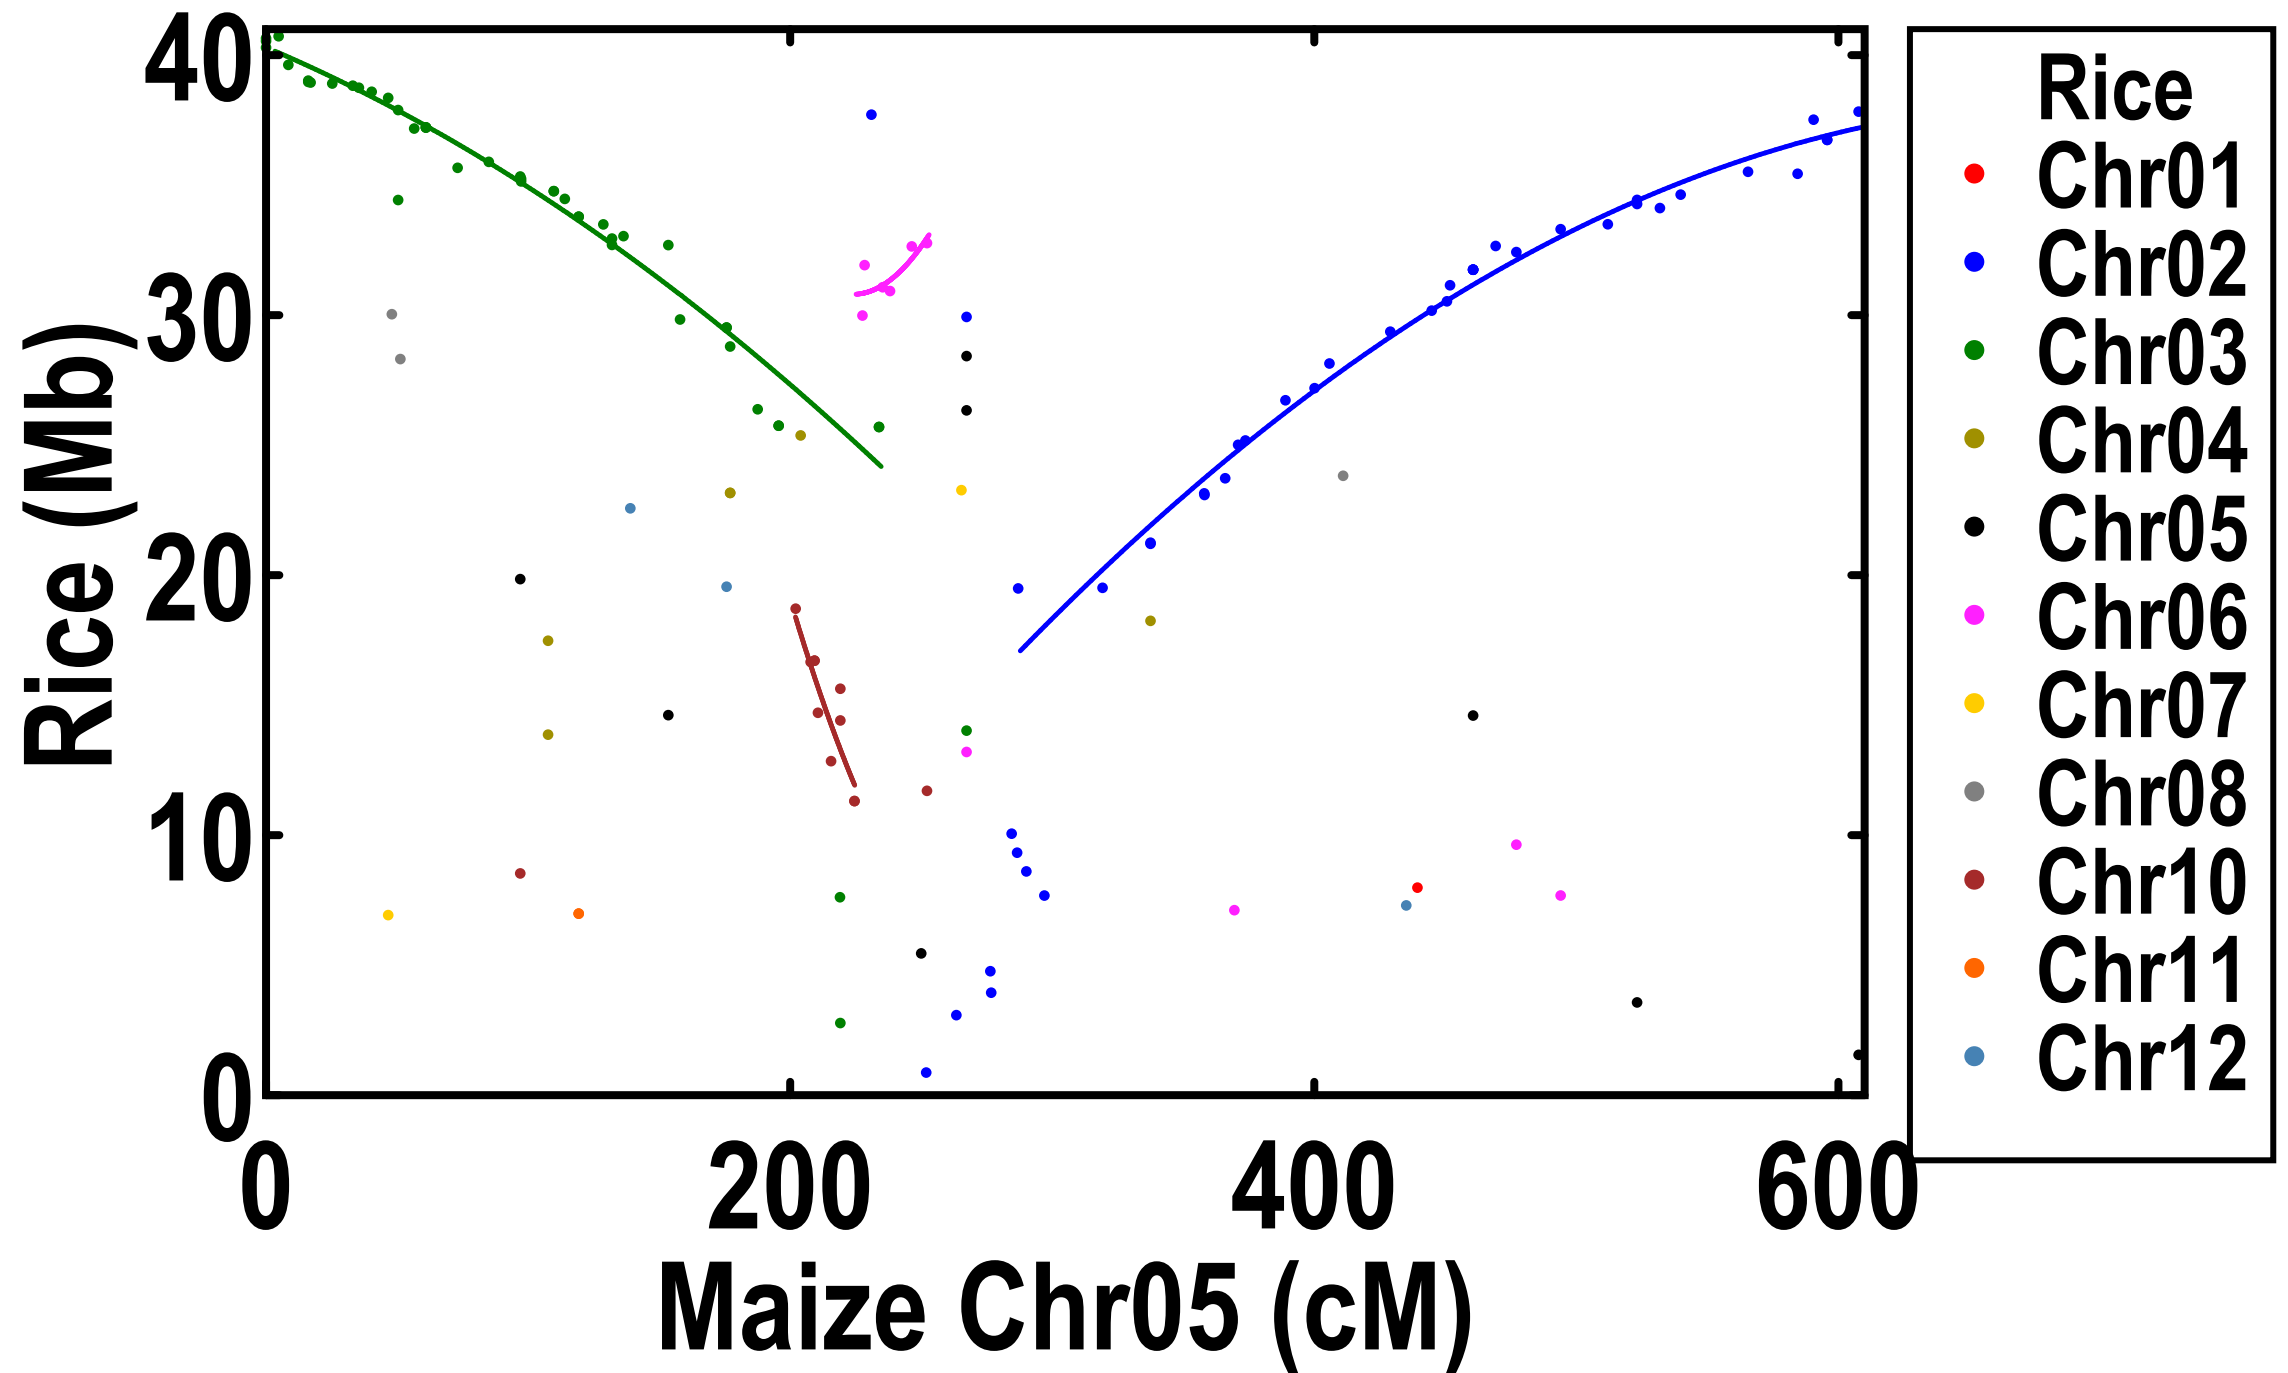

Supplement: S9 (10.1371/journal.pbio.0030038.s009) [file redirect.do]

# Maize-Rice Comparison

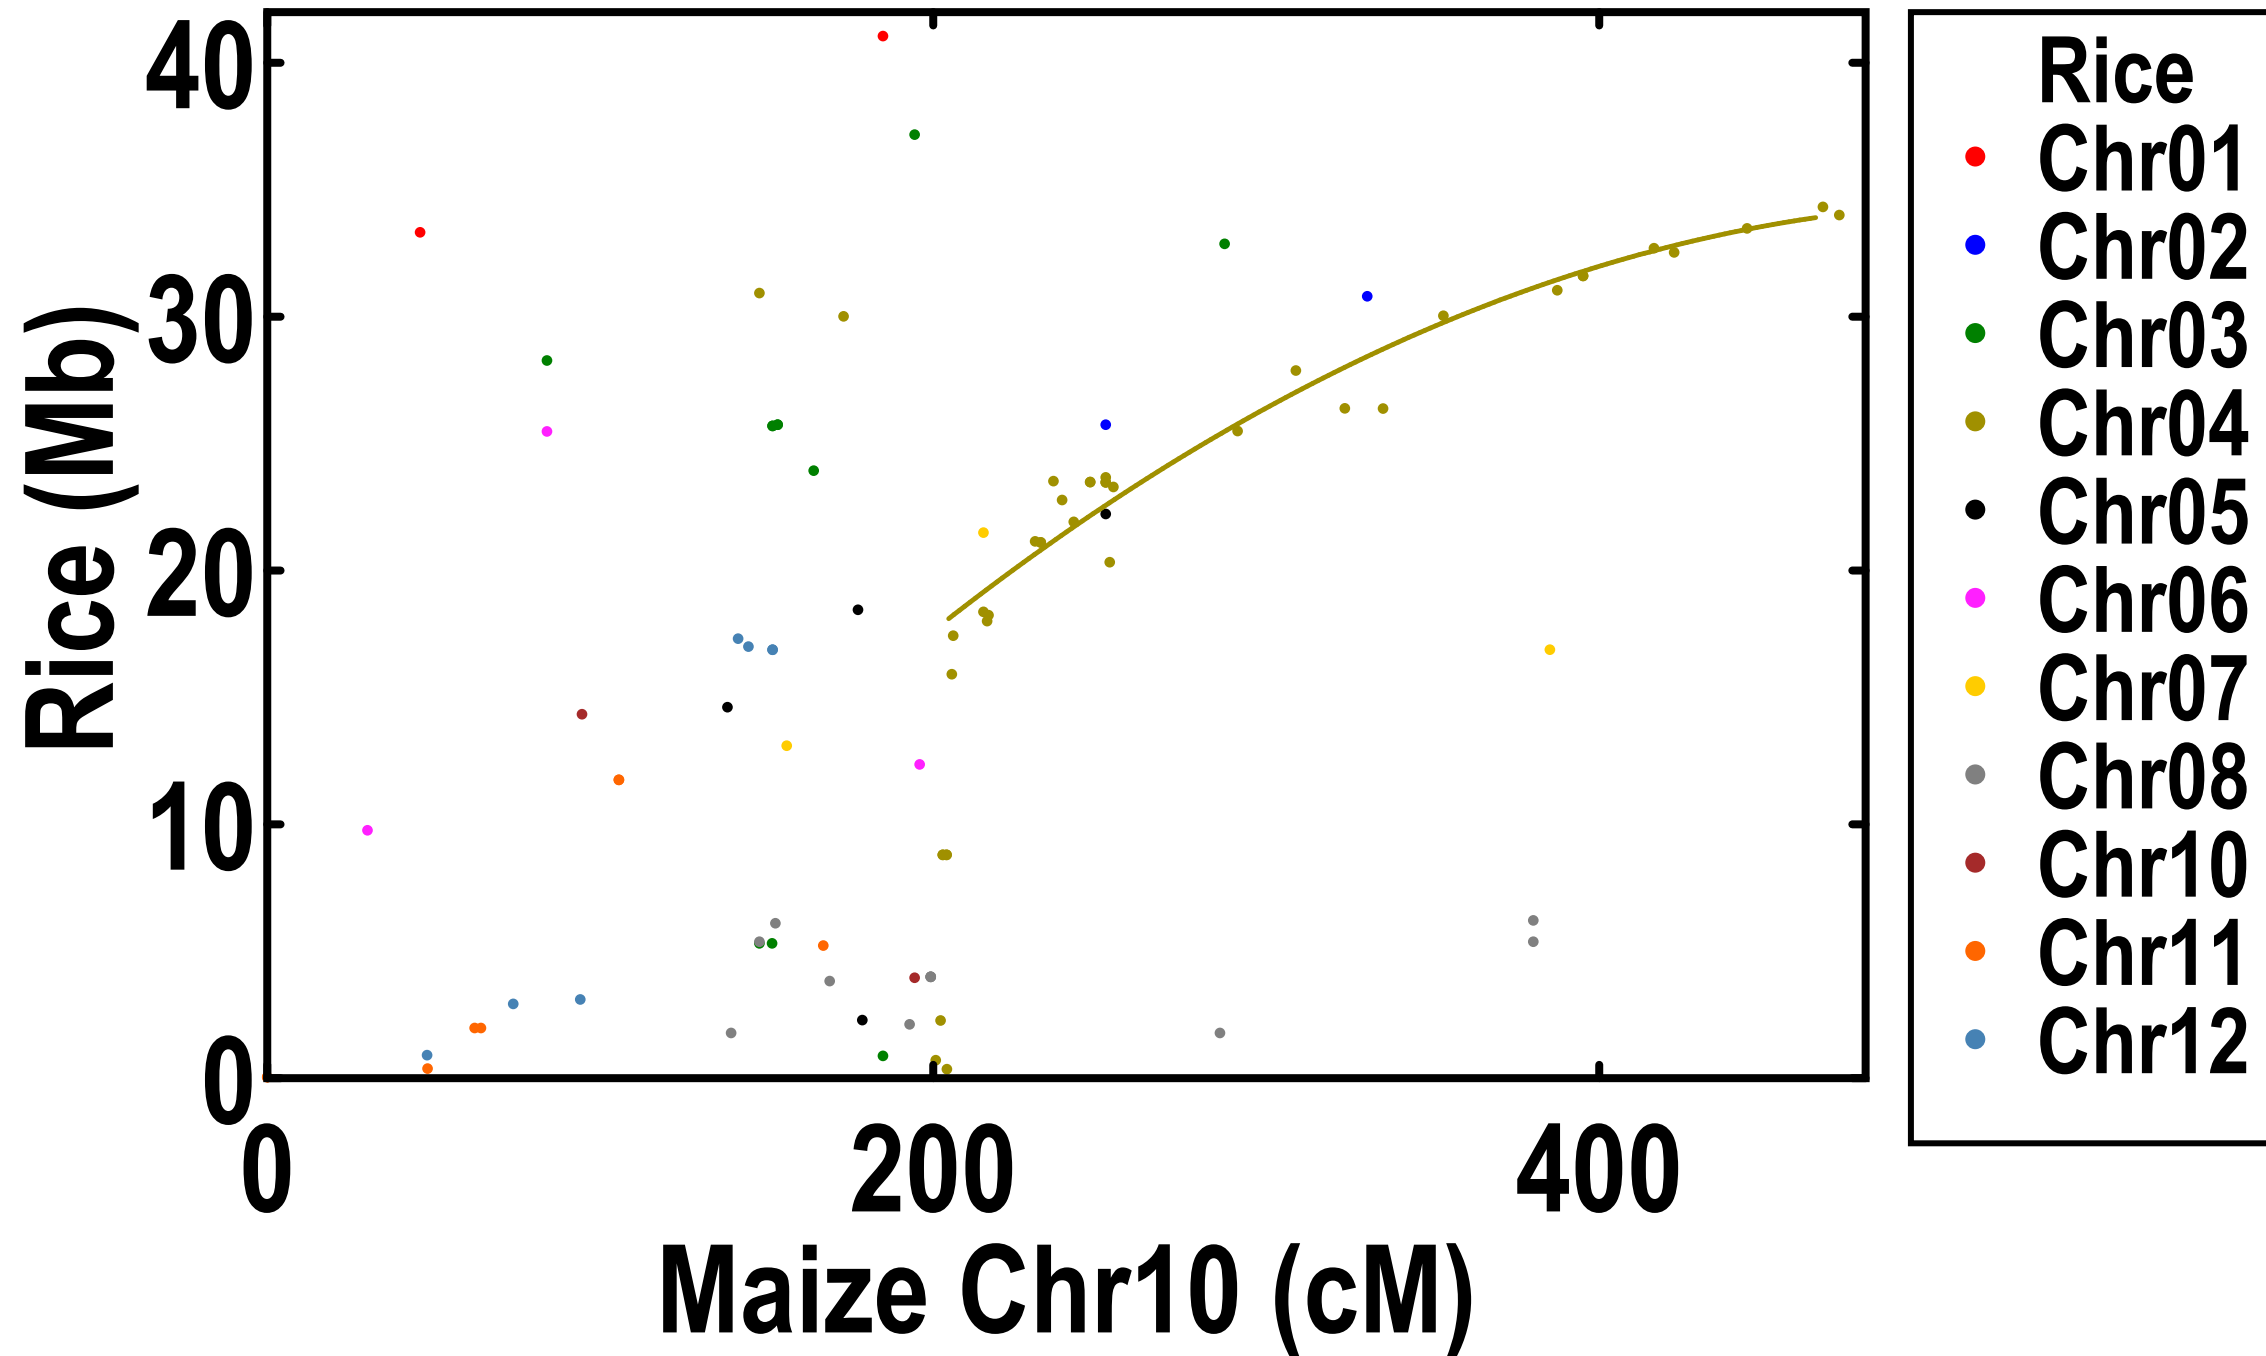

Supplement: S9 (10.1371/journal.pbio.0030038.s009) [file redirect.do]

# Maize-Rice Comparison

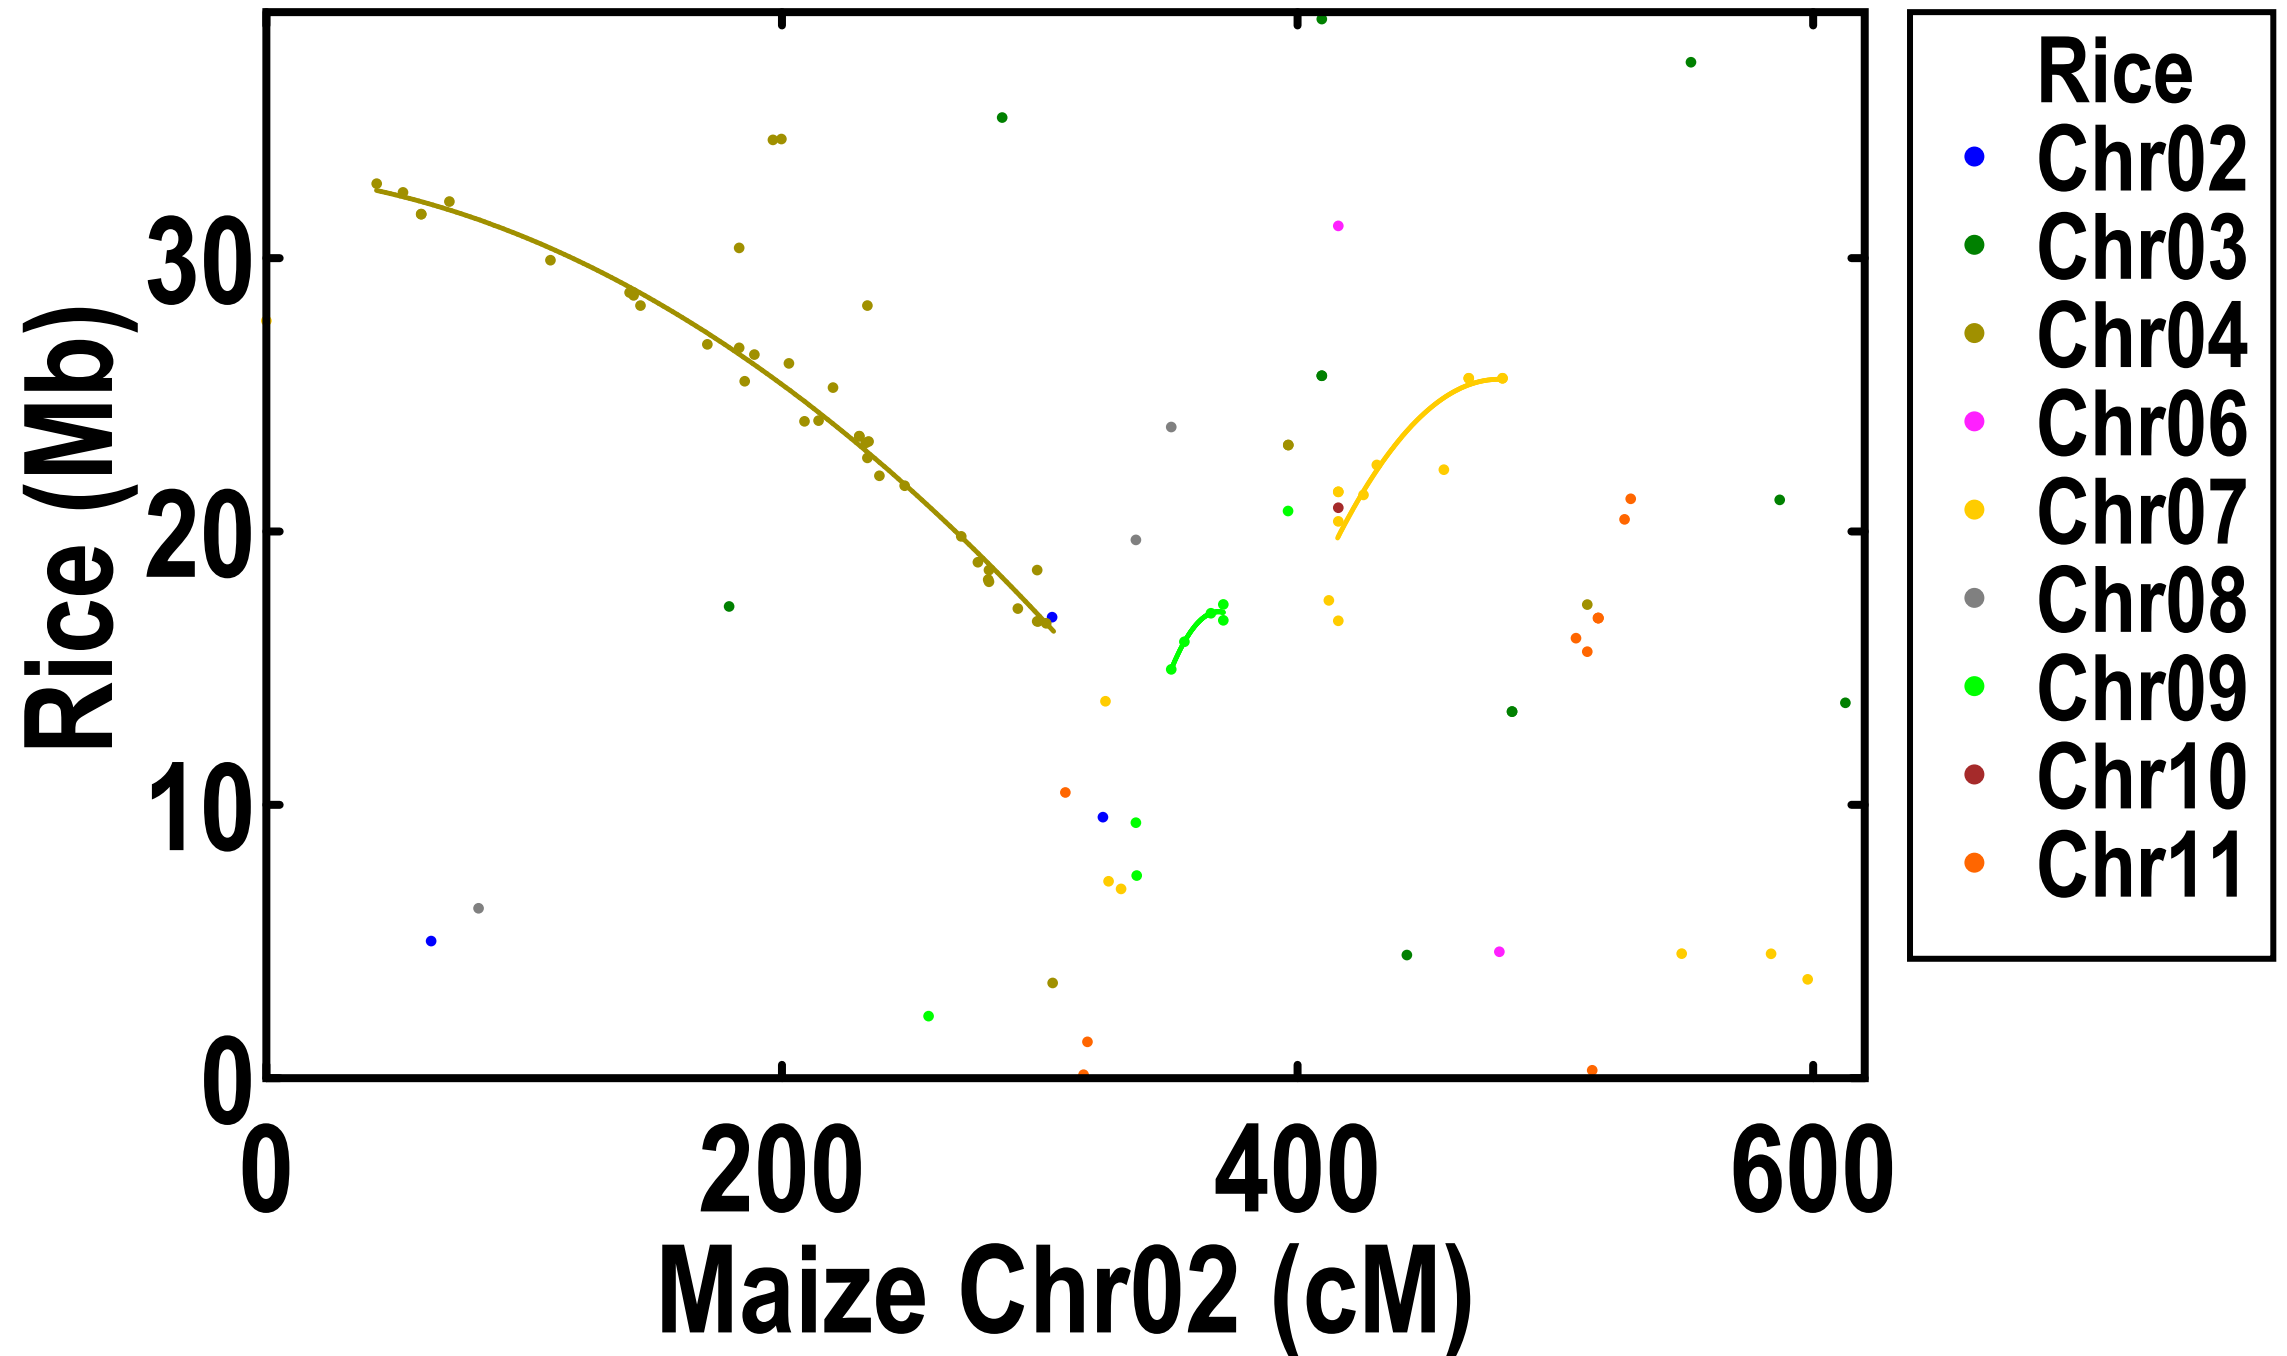

Supplement: S9 (10.1371/journal.pbio.0030038.s009) [file redirect.do]

# Maize-Rice Comparison

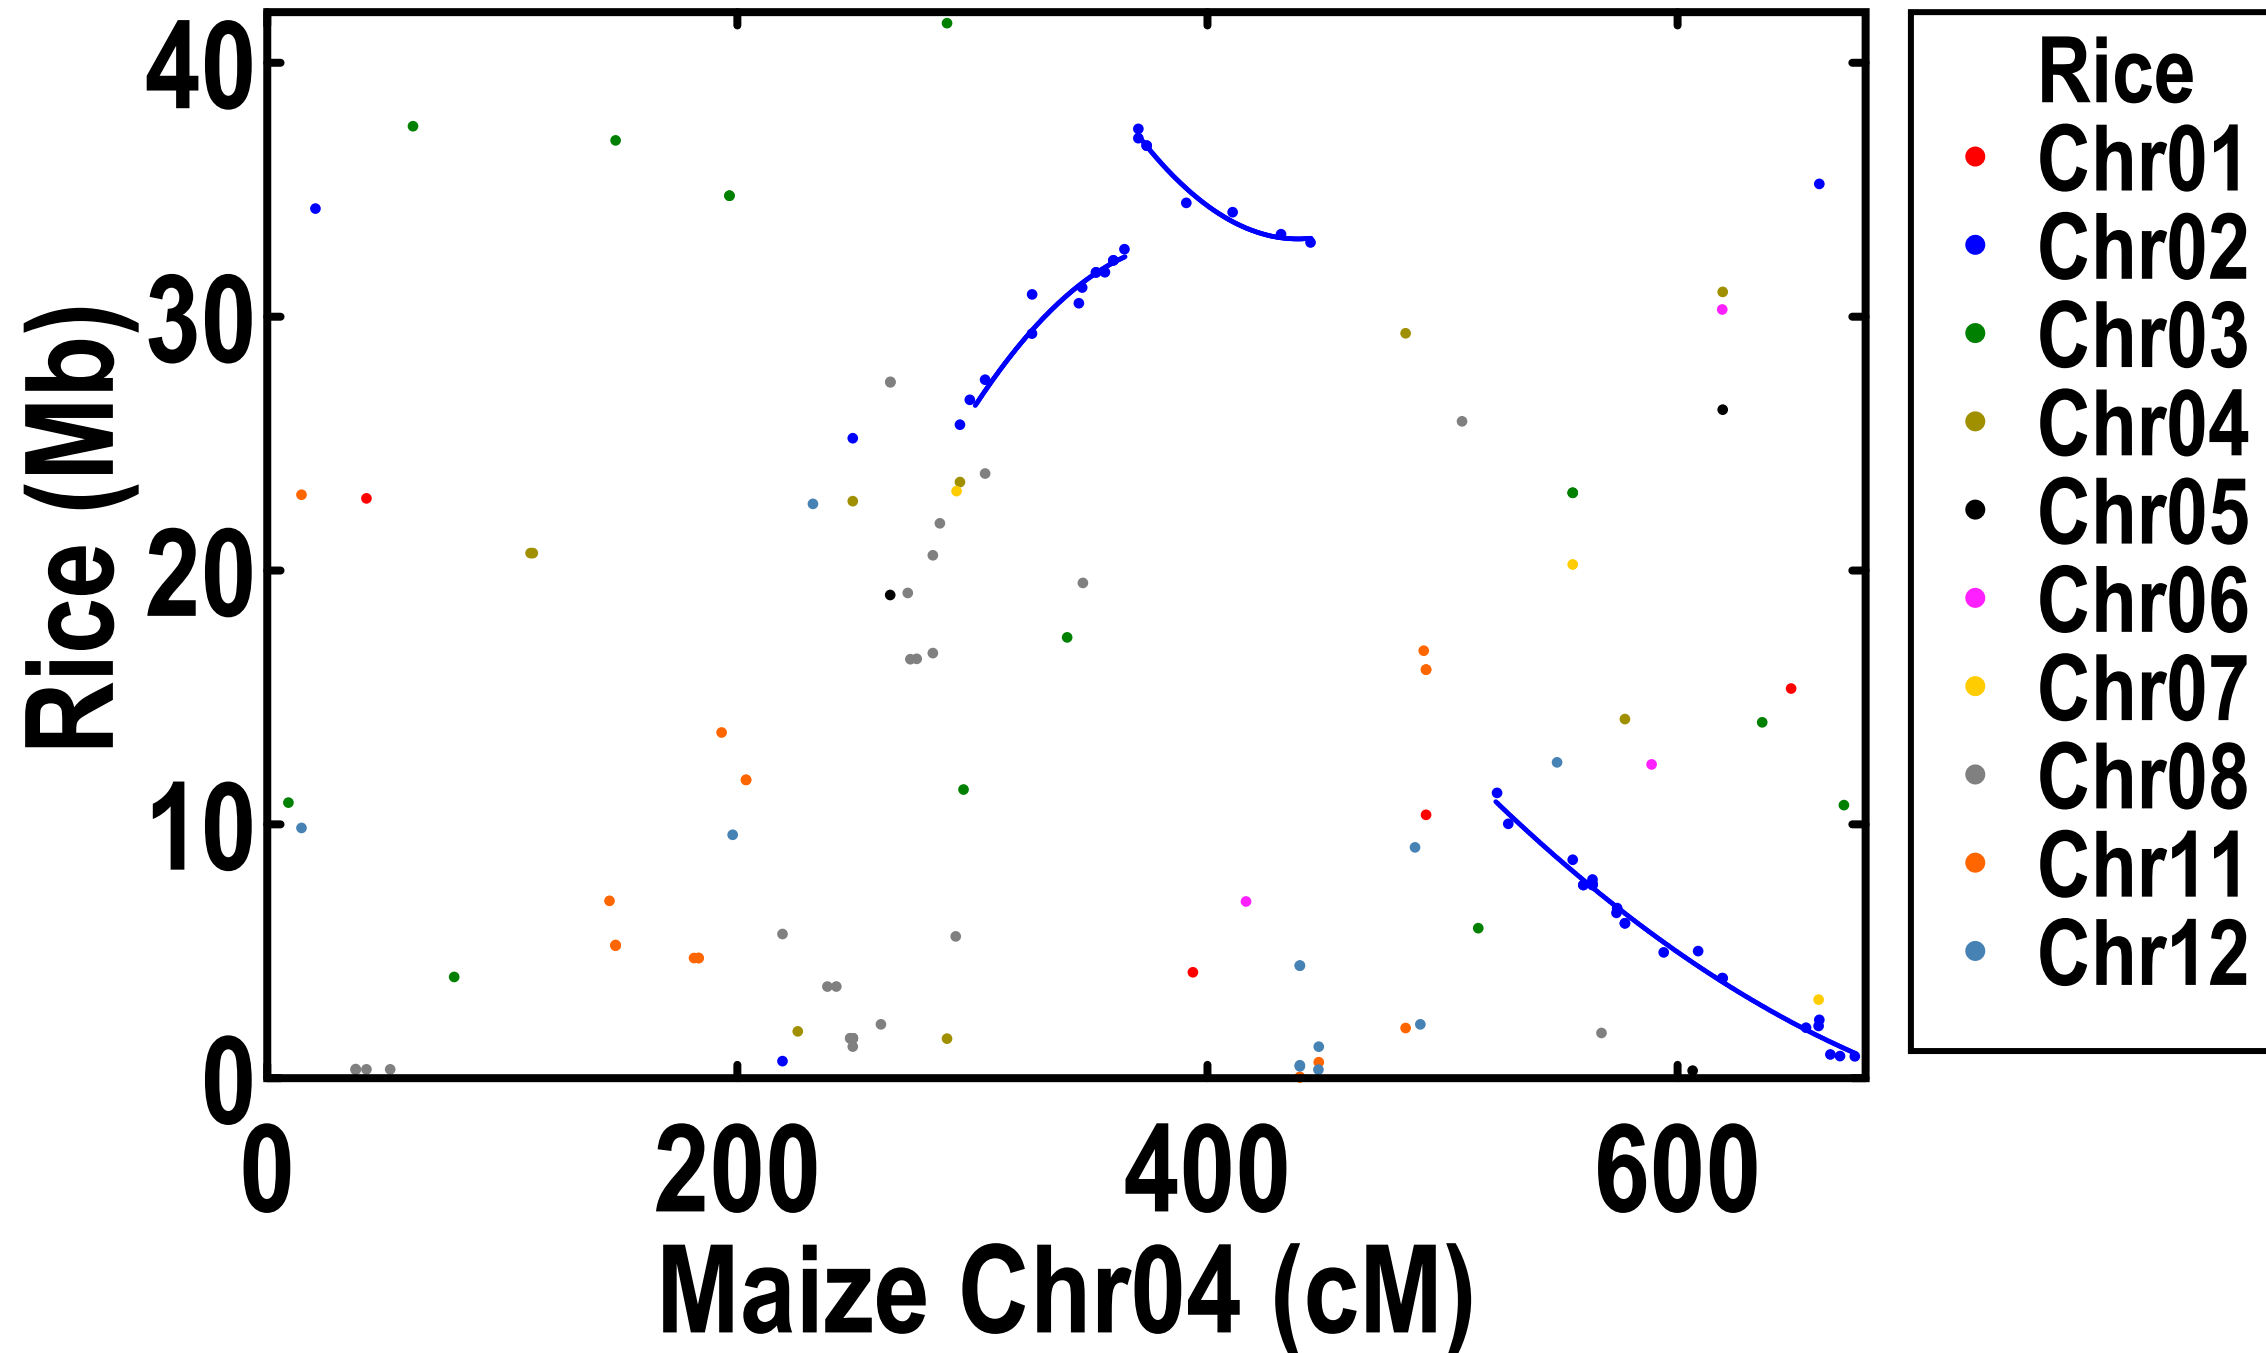

Supplement: S9 (10.1371/journal.pbio.0030038.s009) [file redirect.do]
